# Supplementary material for: Phosphine-catalyzed hydroboration of propiolonitriles: access to (E)-1,2-vinylcyanotrifluoroborate derivatives
Source: Royal Society of Chemistry journal article supplement (doi:10.1039/d2cc00603k), 2022-01-01
Supplement: d2cc00603k1.pdf [file d2cc00603k1.pdf]

## Supplemental Information

### Phosphine-catalyzed Hydroboration of Propiolonitriles: Access to (E)-1,2-vinylcyanotrifluoroborate derivatives

Johnathan Bowen, Carla Slebodnick, and Webster L. Santos\*

Department of Chemistry, Virginia Tech, Blacksburg, VA 24061 (USA)

\*E-mail: [santosw@vt.edu](mailto:santosw@vt.edu)

#### Table of Contents

|                                                                              |     |
|------------------------------------------------------------------------------|-----|
| 1. Materials and Methods.....                                                | S2  |
| 2. Instrumentation .....                                                     | S2  |
| 3. General Procedures for Preparing Propiolonitriles .....                   | S2  |
| 4. Characterization of Propiolonitriles: .....                               | S3  |
| 5. General Procedures for Hydroboration of Propiolonitriles:.....            | S4  |
| 6. Characterization of (E)-1,2-vinylcyanoborane (2a): .....                  | S5  |
| 7. General Procedure for Preparing Potassium Trifluoroborate Salts.....      | S5  |
| 8. Characterization of Potassium Trifluoroborate Salts .....                 | S6  |
| 9. Procedure for Suzuki-Miyaura Cross-Coupling.....                          | S10 |
| 10. Characterization for 3,3-diphenylacrylonitrile (4).....                  | S10 |
| 11. Procedure for Oxidation of (E)-1,2-vinylcyanoborane .....                | S10 |
| 12. Characterization for 3-oxo-3-phenylpropanenitrile (5).....               | S11 |
| 13. General Procedure For <sup>31</sup> P NMR Studies.....                   | S11 |
| 14. X-Ray Crystallography Experimental.....                                  | S11 |
| 15. References.....                                                          | S11 |
| 16. NMR Spectra of Propiolonitriles .....                                    | S12 |
| 17. NMR Spectra of Crude 1,2-vinylcyanoboranes .....                         | S15 |
| 18. NMR Spectra of 1,2-vinylcyanoboronate esters .....                       | S24 |
| 19. NMR Spectra of 1,2-vinylcyanoborane Potassium Trifluoroborate Salts..... | S25 |
| 20. NMR Spectra for <sup>31</sup> P NMR studies .....                        | S63 |

## 1. Materials and Methods

Reactions were performed using Schlenk technique under Argon or Nitrogen atmosphere. All glassware used was flame-dried or oven-dried overnight. Chemicals were obtained from commercial sources unless otherwise noted. THF, PhCH<sub>3</sub>, CH<sub>2</sub>Cl<sub>2</sub> and CH<sub>3</sub>CN were dried using the Innovative Technology Pure SolvMD solvent purification system. Column chromatography was performed using SiliaFlash P60 40-63 μm, 60 Å. TLC analyses were performed using Silicycle aluminum backed silica gel F-254 plates.

## 2. Instrumentation

NMR spectroscopic experiments were performed using an Agilent 400-MR 400 MHz, an Agilent U4-DD2 400 Hz, or a Bruker Avance II 500 MHz spectrometer. Chemical shifts are reported in δ ppm and <sup>1</sup>H and <sup>13</sup>C NMR are referenced to an internal standard (CDCl<sub>3</sub>, CD<sub>3</sub>OD, DMSO, TMS, or acetone-*d*<sub>6</sub>). Data are reported as follows: chemical shift, multiplicity (s = singlet, d = doublet, t = triplet, q = quartet, dd = doublet of doublets, dt = doublet of triplets, td = triplet of doublets, tt = triplet of triplets, ddt = doublet of doublet of triplets, m = multiplet), coupling constants (Hz), and integration. When present, the *Z*-isomer of 1,2-vinylcyanoboranes is reported as minor (*Z*/*cis*-isomer). ESI mass spectra were acquired using an Agilent 6220 TOF LC-MS.

## 3. General Procedures for Preparing Propiolonitriles

Propiolonitriles **1a** and **1d-r** were prepared in accordance with **Procedure 3.1** and propiolonitriles **1b-c** were prepared via **Procedure 3.2**. References for the spectra of previously known propiolonitriles are provided in Table S1. Propiolonitriles **1n** and **1p** were prepared according to the following general procedures unless noted otherwise.

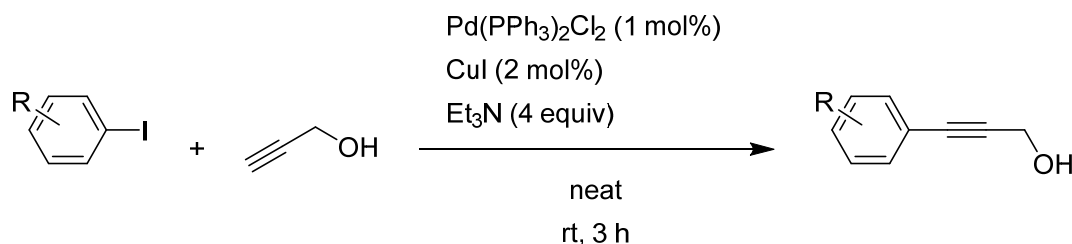

**Procedure 3.1.**<sup>1</sup> To an oven-dried flask equipped with a stir bar was added Pd(PPh<sub>3</sub>)<sub>2</sub>Cl<sub>2</sub> (0.01 equiv, 0.05 mmol) and copper(I) iodide (0.02 equiv, 0.10 mmol). After purging with N<sub>2</sub>, aryl iodide (1 equiv, 5.0 mmol), propargyl alcohol (1.1 equiv, 5.5 mmol), and triethylamine (4 equiv, 20 mmol) were added. The suspension was stirred at room temperature for 4 hours and filtered. Concentration of the filtrate *in vacuo* yielded the crude product which was subjected to silica column chromatography (eluted with 1:4 ethyl acetate:hexanes) to afford the crude propargyl alcohol as a yellow oil, which was concentrated *in vacuo*. The crude alcohol was used without further purification.

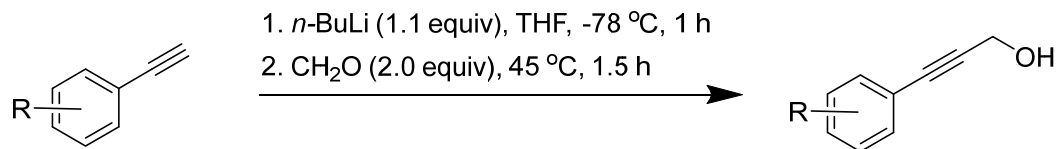

**Procedure 3.2.**<sup>2</sup> An oven-dried round bottom flask was charged with aryl alkyne (1 equiv, 5.0 mmol) and placed under N<sub>2</sub> via Schlenk technique. The reaction was diluted with THF (15 mL) and stirred at -78 °C (dry ice/acetone bath). n-Butyllithium (1.1 equiv, 5.5 mmol) was then added dropwise to the mixture and stirred for 1 hour. Paraformaldehyde (2.0 equiv, 10 mmol) was then added in one portion and the reaction allowed to warm to room temperature before stirring at 45 °C for 1.5 hours. Upon completion, the reaction was quenched with water (15 mL) and diluted with diethyl ether (10 mL). The organic layer was washed with brine (10 mL) and dried over anhydrous sodium sulfate. Concentration *in vacuo* yielded a yellow oil which upon purification by silica gel column chromatography (1:4 ethyl acetate:hexanes) yielded the propargyl alcohol as a yellow oil. The crude alcohol was used without further purification.

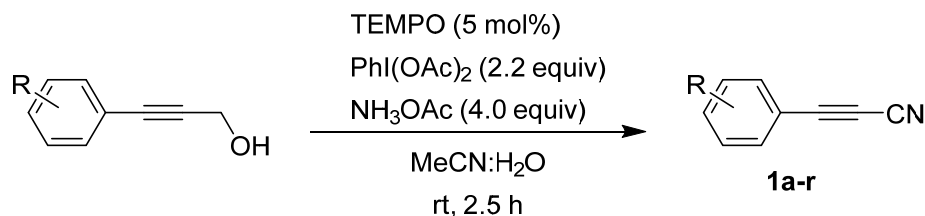

**Procedure 3.3.**<sup>3</sup> To an oven-dried flask equipped with a stir bar was added the crude alcohol, ammonium acetate (4 equiv, 19.2 mmol), TEMPO (0.05 equiv, 241 μmol), and PhI(OAc)<sub>2</sub> (2.2 equiv, 11 mmol). After purging with N<sub>2</sub>, the reaction was diluted with a MeCN (18 mL) and water (2 mL) and stirred at room temperature for 2.5 hours. Upon completion, the reaction was quenched with water (15 mL) and diluted with diethyl ether (10 mL). The organic layer was washed with brine (10 mL) and dried over anhydrous sodium sulfate. Concentration *in vacuo* yielded a yellow oil which upon purification by silica gel column chromatography (0-5% ethyl acetate:hexanes) yielded the propiolonitrile as a yellow solid.

#### 4. Characterization of Propiolonitriles:

**Table S1. References for Propiolonitrile Substrates**

| Substrate | R <sup>1</sup>               | Reference                                               |
|-----------|------------------------------|---------------------------------------------------------|
| <b>1a</b> | H                            | <i>Synlett</i> <b>2014</b> , 25, 1275-1278.             |
| <b>1b</b> | <i>o</i> -Me                 | <i>Can. J. Chem.</i> <b>2017</b> , 95, 144-148.         |
| <b>1c</b> | <i>p</i> -Et                 | <i>Org. Lett.</i> <b>2019</b> , 21, 8308-8311.          |
| <b>1d</b> | <i>p</i> - <i>t</i> Bu       | <i>Tetrahedron Lett.</i> <b>2018</b> , 59, 4622-4625.   |
| <b>1e</b> | <i>o</i> -OMe                | <i>Adv. Synth. Catal.</i> <b>2013</b> , 355, 1207-1210. |
| <b>1f</b> | <i>m</i> -OMe                | <i>Adv. Synth. Catal.</i> <b>2013</b> , 355, 1207-1210. |
| <b>1g</b> | <i>p</i> -OMe                | <i>Tetrahedron Lett.</i> <b>2018</b> , 59, 4622-4625.   |
| <b>1h</b> | <i>o</i> -F                  | <i>Org. Lett.</i> <b>2017</b> , 19, 5613-5616.          |
| <b>1i</b> | <i>p</i> -F                  | <i>Org. Lett.</i> <b>2019</b> , 21, 8308-8311.          |
| <b>1j</b> | <i>o</i> -Cl                 | <i>Can. J. Chem.</i> <b>2017</b> , 95, 144-148.         |
| <b>1k</b> | <i>m</i> -Cl                 | <i>Tetrahedron Lett.</i> <b>2018</b> , 59, 4622-4625.   |
| <b>1l</b> | <i>p</i> -Cl                 | <i>Can. J. Chem.</i> <b>2017</b> , 95, 144-148.         |
| <b>1m</b> | <i>p</i> -CN                 | <i>Org. Lett.</i> <b>2019</b> , 21, 8308-8311.          |
| <b>1o</b> | 3-(naphthalen-2-yl)          | <i>Can. J. Chem.</i> <b>2017</b> , 95, 144-148.         |
| <b>1q</b> | 3-(benzo[d][1,3]dioxol-5-yl) | <i>Chem. Eur. J.</i> <b>2018</b> , 24, 12767-12772.     |
| <b>1r</b> | 3-([1,1'-biphenyl]-4-yl)     | <i>Can. J. Chem.</i> <b>2017</b> , 95, 144-148.         |

### 3-(cyanoethynyl)benzonitrile (1n)

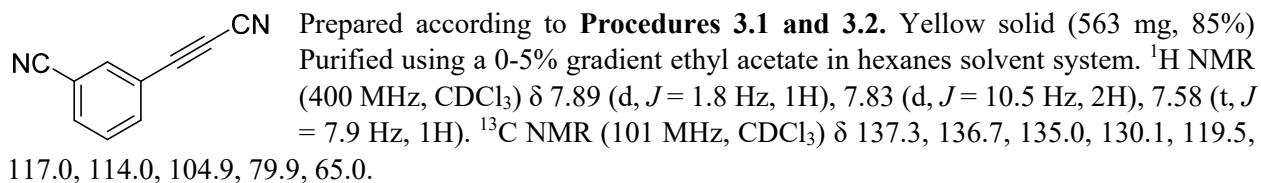

### 3-(benzofuran-6-yl)propiolonitrile (1p)

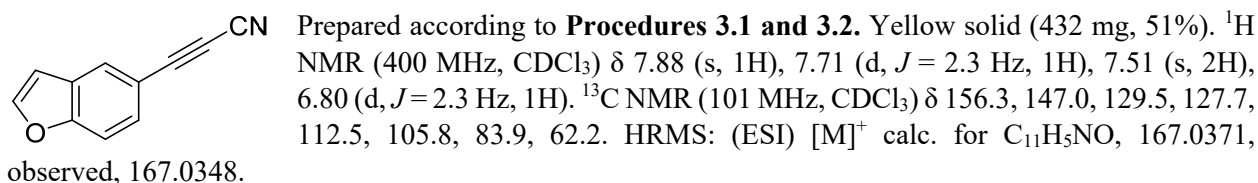

### 7-([1,1'-biphenyl]-4-ylmethoxy)hept-2-ynenitrile (1s)

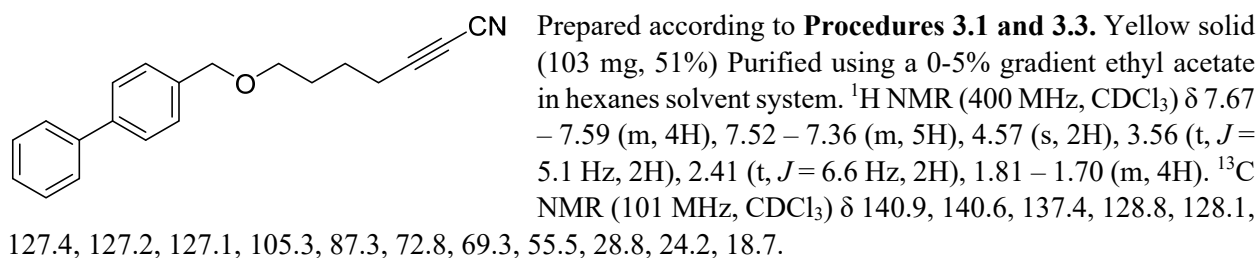

## 5. General Procedures for Hydroboration of Propiolonitriles:

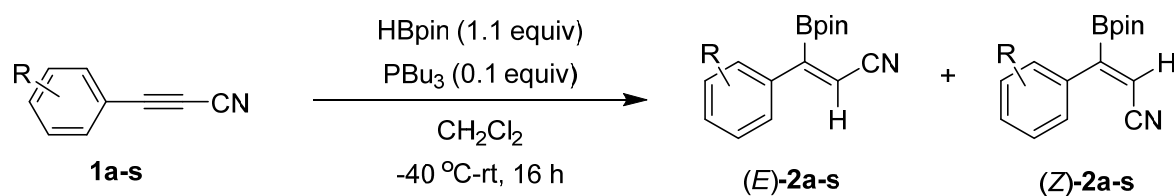

**Procedure 5.1.** An oven-dried round bottom flask was charged with propiolonitrile (1 equiv, 0.30 mmol) and placed under  $\text{N}_2$  via Schlenk technique. The solid was dissolved in dichloromethane (0.40 mL), and pinacolborane (1.1 equiv, 0.33 mmol) was added. The reaction was cooled to  $-40$  °C (dry ice/acetonitrile bath) for 15 minutes. Tributylphosphine (0.1 equiv, 30  $\mu\text{mol}$ ) was added, and the reaction was allowed to slowly warm to room temperature overnight. The crude mixture was concentrated *in vacuo* and filtered through a plug of silica (1:1 ethyl acetate:hexanes). The crude mixture was concentrated *in vacuo*, and dissolved in  $\text{CDCl}_3$  (0.750 mL, 0.05% TMS) for yield determination *via*  $^1\text{H}$  NMR. The sample was concentrated *in vacuo* and the crude 1,2-vinylcyanoborane was used without further purification.

Note 1: When this reaction was performed with 3-(2,6-dimethylphenyl)propiolonitrile using optimized conditions. Surprisingly, the expected vinylcyanopinacolborane was not observed.

Note 2:  $^1\text{H}$  NMR doublets at 6 and 7.4 ppm for the crude mixture of the aforementioned reaction are the result of protodeboronation of the pinacolboronate ester to the cyano alkene. Substrates containing electron withdrawing substituents have increased susceptibility to this type of degradation. The subsequent conversion to the  $\text{BF}_3$  salt removes this impurity.

## 6. General Procedure For $^{31}\text{P}$ NMR Studies

**Procedure 6.1.** An oven-dried 2-dram vial was charged with **1a** (1 equiv, 80  $\mu\text{mol}$ ) and placed under  $\text{N}_2$  via Schlenk technique. The solid was dissolved in  $\text{CDCl}_3$  (0.75 mL), and  $\text{BF}_3\cdot\text{OEt}_2$  (1 equiv, 80  $\mu\text{mol}$ ) was added. Triphenylphosphine (1 equiv, 80  $\mu\text{mol}$ ) was added in one portion and  $^{31}\text{P}$  NMR data was immediately obtained.

### 6. Characterization of (*E*)-1,2-vinylcyanoborane (**2a**):

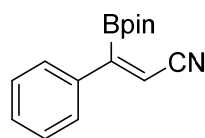

Prepared according to **Procedure 5.1**. Yellow solid (29 mg, 64%).  $^1\text{H}$  NMR (400 MHz,  $\text{CDCl}_3$ )  $\delta$  7.50 – 7.33 (m, 5H), 6.03 (s, 1H), 1.41 (s, 12H).  $^{13}\text{C}$  NMR (101 MHz,  $\text{CDCl}_3$ )  $\delta$  138.0, 129.9, 128.9, 127.0, 117.6, 106.5, 85.4, 24.8. HRMS: (ESI)  $[\text{M}+\text{H}]^+$  calc. for  $\text{C}_{15}\text{H}_{19}\text{BNO}_2$ , 256.1503, observed, 256.1511

### Procedure for 4.6 mmol scale:

An oven-dried round bottom flask was charged with propionitrile (1 equiv, 4.6 mmol) and placed under  $\text{N}_2$  via Schlenk technique. The solid was dissolved in dichloromethane (5.00 mL), and pinacolborane (1.1 equiv, 5.1 mmol) was added. The reaction was cooled to  $-78\text{ }^\circ\text{C}$  (dry ice/acetone bath) for 15 minutes. Tributylphosphine (0.1 equiv, 0.46 mmol) was added, and the reaction was allowed to slowly warm to room temperature overnight. MeI (0.3 equiv, 1.39 mmol) was added and the reaction was stirred at room temperature for one hour. The crude mixture was concentrated *in vacuo* and filtered over a plug of silica (1:1 ethyl acetate:hexanes solvent system). The sample was concentrated *in vacuo* to yield a yellow oil which upon purification by silica gel column chromatography (15% ethyl acetate:hexanes solvent system) yielded the 1,2-vinylcyanoborane as a yellow solid (767 mg, 65%).

## 7. General Procedure for Preparing Potassium Trifluoroborate Salts

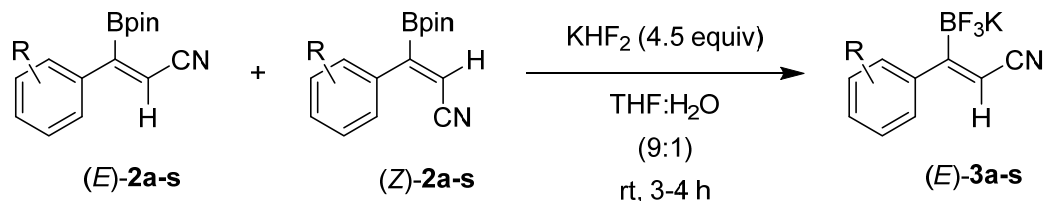

**Procedure 6.1.** The crude 1,2-vinylcyanoborane (1 equiv, 0.2 mmol) was dissolved in THF (2 mL) and  $\text{KHF}_2$  (4.5 equiv, 0.9 mmol) was added. The minimum amount of water necessary to dissolve  $\text{KHF}_2$  was added, and the reaction was stirred for 4 hours at room temperature. Solvent was removed *in vacuo*. Water was removed by addition of toluene (5 mL) and concentration *in vacuo* three times. The resulting solid was dissolved in acetonitrile (5 mL) and filtered. The filtrate was concentrated and the corresponding trifluoroborate salt was precipitated as a single isomer from acetonitrile and diethyl ether.

Note: Compound **3s** was isolated as a 90:10 mixture of *E/Z* isomers.

## 8. Characterization of Potassium Trifluoroborate Salts

### (*E*)-3-phenyl-3-(trifluoro- $\lambda^4$ -boraneyl)acrylonitrile, potassium salt (3a)

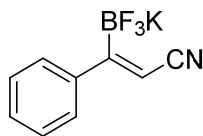

Prepared according to **Procedure 6.1**. White Solid (30 mg, 64%).  $^1\text{H}$  NMR (400 MHz, DMSO- $d_6$ )  $\delta$  7.48 – 7.33 (m, 2H), 7.33 – 7.16 (m, 3H), 5.54 (s, 1H).  $^{13}\text{C}$  NMR (101 MHz, DMSO- $d_6$ )  $\delta$  144.2, 128.1, 127.7, 127.4, 120.4, 99.4.  $^{19}\text{F}$  NMR (376 MHz, DMSO- $d_6$ )  $\delta$  -136.05 – 136.88 (m).  $^{11}\text{B}$  NMR (128 MHz, DMSO- $d_6$ )  $\delta$  1.65 (q,  $J = 50.4$  Hz). HRMS: (ESI)  $[\text{M}]^-$  calc. for  $\text{C}_9\text{H}_6\text{BF}_3\text{N}^-$ , 196.0545, observed, 196.0548.

### (*E*)-3-(*o*-tolyl)-3-(trifluoro- $\lambda^4$ -boraneyl)acrylonitrile, potassium salt (3b)

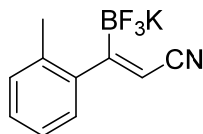

Prepared according to **Procedure 6.1**. White solid (41 mg, 76%).  $^1\text{H}$  NMR (500 MHz,  $\text{CD}_3\text{CN}$ )  $\delta$  7.18 – 7.02 (m, 3H), 6.90 (d,  $J = 5.4$  Hz, 1H), 5.24 (s, 1H), 2.20 (s, 3H).  $^{13}\text{C}$  NMR (126 MHz,  $\text{CD}_3\text{CN}$ )  $\delta$  145.8, 133.9, 129.4, 126.3, 125.9, 124.7, 119.7, 100.4, 19.3.  $^{19}\text{F}$  NMR (376 MHz,  $\text{CD}_3\text{CN}$ )  $\delta$  -140.88 (d,  $J = 47.0$  Hz).  $^{11}\text{B}$  NMR (128 MHz,  $\text{CD}_3\text{CN}$ )  $\delta$  1.34 (q,  $J = 48.9$  Hz). HRMS: (ESI)  $[\text{M}]^-$  calc. for  $\text{C}_{10}\text{H}_8\text{BF}_3\text{N}^-$ , 210.0702, observed, 210.0703.

### (*E*)-3-(4-ethylphenyl)-3-(trifluoro- $\lambda^4$ -boraneyl)acrylonitrile, potassium salt (3c)

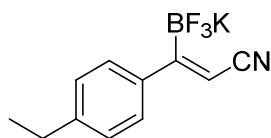

Prepared according to **Procedure 6.1**. White solid (44 mg, 75%).  $^1\text{H}$  NMR (500 MHz,  $\text{CD}_3\text{CN}$ )  $\delta$  7.36 (d,  $J = 8.2$  Hz, 2H), 7.14 (d,  $J = 8.4$  Hz, 2H), 5.54 (s, 1H), 2.62 (q,  $J = 7.6$  Hz, 2H), 1.20 (t,  $J = 7.6$  Hz, 3H).  $^{13}\text{C}$  NMR (126 MHz,  $\text{CD}_3\text{CN}$ )  $\delta$  143.8, 141.5, 127.3, 127.1, 120.4, 98.4, 28.2, 15.1.  $^{19}\text{F}$  NMR (376 MHz,  $\text{CD}_3\text{CN}$ )  $\delta$  -139.00 (q,  $J = 46.7$  Hz).  $^{11}\text{B}$  NMR (128 MHz,  $\text{CD}_3\text{CN}$ )  $\delta$  1.79 (q,  $J = 49.9$  Hz). HRMS: (ESI)  $[\text{M}]^-$  calc. for  $\text{C}_{11}\text{H}_{10}\text{BF}_3\text{N}^-$ , 224.0858, observed, 224.0856.

### (*E*)-3-(4-(*tert*-butyl)phenyl)-3-(trifluoro- $\lambda^4$ -boraneyl)acrylonitrile, potassium salt (3d)

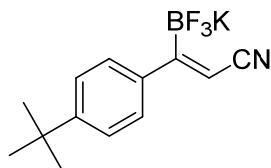

Prepared according to **Procedure 6.1**. White solid (46 mg, 74%).  $^1\text{H}$  NMR (400 MHz, DMSO- $d_6$ )  $\delta$  7.32 (d,  $J = 8.1$  Hz, 2H), 7.24 (d,  $J = 8.2$  Hz, 2H), 5.49 (s, 1H), 1.23 (s, 9H).  $^{13}\text{C}$  NMR (101 MHz, DMSO- $d_6$ )  $\delta$  150.1, 141.2, 127.2, 124.8, 120.6, 98.8 – 98.4 (m), 34.6, 31.5.  $^{19}\text{F}$  NMR (376 MHz, DMSO- $d_6$ )  $\delta$  -136.28.  $^{11}\text{B}$  NMR (128 MHz, DMSO- $d_6$ )  $\delta$  1.36 (t,  $J = 51.2$  Hz). HRMS: (ESI)  $[\text{M}]^-$  calc. for  $\text{C}_{13}\text{H}_{14}\text{BF}_3\text{N}^-$ , 252.1177, observed, 252.1172.

### (*E*)-3-(2-methoxyphenyl)-3-(trifluoro- $\lambda^4$ -boraneyl)acrylonitrile, potassium salt (3e)

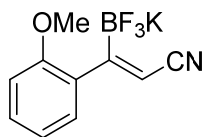

Prepared according to **Procedure 6.1**. White solid (67 mg, 45%).  $^1\text{H}$  NMR (500 MHz,  $\text{CD}_3\text{CN}$ )  $\delta$  7.18 – 7.02 (m, 3H), 6.90 (d,  $J = 5.4$  Hz, 1H), 5.24 (s, 1H), 2.20 (s, 3H).  $^{13}\text{C}$  NMR (126 MHz,  $\text{CD}_3\text{CN}$ )  $\delta$  145.8, 133.9, 129.4, 126.3, 125.9, 124.7, 119.7, 100.4,

19.3.  $^{19}\text{F}$  NMR (376 MHz,  $\text{CD}_3\text{CN}$ )  $\delta$  -140.88 (d,  $J$  = 47.0 Hz).  $^{11}\text{B}$  NMR (128 MHz,  $\text{CD}_3\text{CN}$ )  $\delta$  1.34 (q,  $J$  = 48.9 Hz). HRMS: (ESI)  $[\text{M}]^-$  calc. for  $\text{C}_{13}\text{H}_{14}\text{BF}_3\text{N}^-$ , 226.0657, observed, 226.0653.

**(E)-3-(3-methoxyphenyl)-3-(trifluoro- $\lambda^4$ -boraneyl)acrylonitrile, potassium salt (3f)**

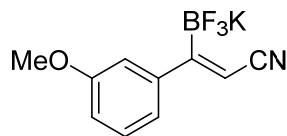

Prepared according to **Procedure 6.1**. White solid (33 mg, 46%).  $^1\text{H}$  NMR (500 MHz,  $\text{CD}_3\text{CN}$ )  $\delta$  7.23 (t,  $J$  = 7.9 Hz, 1H), 7.09 – 6.99 (m, 2H), 6.84 (d,  $J$  = 8.2 Hz, 1H), 5.59 (s, 1H), 3.80 (s, 3H).  $^{13}\text{C}$  NMR (126 MHz,  $\text{CD}_3\text{CN}$ )  $\delta$  159.3, 145.9, 128.7, 120.0, 119.5, 112.7, 112.4, 99.3 (d,  $J$  = 1.7 Hz), 54.7.  $^{19}\text{F}$  NMR (376 MHz,  $\text{CD}_3\text{CN}$ )  $\delta$  -139.17 (d,  $J$  = 46.0 Hz).  $^{11}\text{B}$  NMR (128 MHz,  $\text{CD}_3\text{CN}$ )  $\delta$  1.67 (q,  $J$  = 49.0 Hz). HRMS: (ESI)  $[\text{M}]^-$  calc. for  $\text{C}_{10}\text{H}_8\text{BF}_3\text{NO}^-$ , 226.0657, observed, 226.0651.

**(E)-3-(4-methoxyphenyl)-3-(trifluoro- $\lambda^4$ -boraneyl)acrylonitrile, potassium salt (3g)**

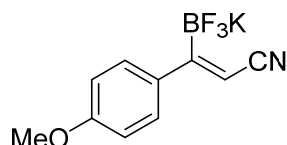

Prepared according to **Procedure 6.1**. White solid (44 mg, 66%).  $^1\text{H}$  NMR (400 MHz,  $\text{CD}_3\text{CN}$ )  $\delta$  7.45 (d,  $J$  = 8.7 Hz, 1H), 6.88 (d,  $J$  = 8.7 Hz, 1H), 3.78 (s, 2H).  $^{13}\text{C}$  NMR (101 MHz,  $\text{CD}_3\text{CN}$ )  $\delta$  159.6, 136.1, 128.5, 120.7, 113.2, 97.3, 54.8.  $^{19}\text{F}$  NMR (376 MHz,  $\text{CD}_3\text{CN}$ )  $\delta$  -138.71 (d,  $J$  = 44.4 Hz).  $^{11}\text{B}$  NMR (128 MHz,  $\text{CD}_3\text{CN}$ )  $\delta$  1.86 (q,  $J$  = 50.8 Hz). HRMS: (ESI)  $[\text{M}]^-$  calc. for  $\text{C}_{10}\text{H}_8\text{BF}_3\text{NO}^-$ , 226.0657, observed, 226.0646.

**(E)-3-(2-fluorophenyl)-3-(trifluoro- $\lambda^4$ -boraneyl)acrylonitrile, potassium salt (3h)**

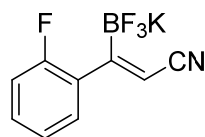

Prepared according to **Procedure 6.1**. White solid (42 mg, 63%).  $^1\text{H}$  NMR (600 MHz,  $\text{CD}_3\text{CN}$ )  $\delta$  7.34 – 7.23 (m, 2H), 7.16 – 7.04 (m, 2H), 5.59 (s, 1H).  $^{13}\text{C}$  NMR (151 MHz,  $\text{CD}_3\text{CN}$ )  $\delta$  158.8 (d,  $J$  = 244.7 Hz), 132.1 (d,  $J$  = 15.1 Hz), 129.9 (d,  $J$  = 4.0 Hz), 128.5 (d,  $J$  = 8.2 Hz), 123.6 (d,  $J$  = 3.6 Hz), 119.6, 115.2 (d,  $J$  = 23.0 Hz), 102.4 (d,  $J$  = 4.0 Hz).  $^{19}\text{F}$  NMR (376 MHz,  $\text{CD}_3\text{CN}$ )  $\delta$  -117.30, -140.94 (d,  $J$  = 45.5 Hz).  $^{11}\text{B}$  NMR (128 MHz,  $\text{CD}_3\text{CN}$ )  $\delta$  1.37 (q,  $J$  = 48.1 Hz). HRMS: (ESI)  $[\text{M}]^-$  calc. for  $\text{C}_9\text{H}_5\text{BF}_4\text{N}^-$ , 214.0457, observed, 214.0452.

**(E)-3-(4-fluorophenyl)-3-(trifluoro- $\lambda^4$ -boraneyl)acrylonitrile, potassium salt (3i)**

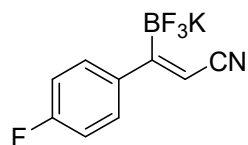

Prepared according to **Procedure 6.1**. White solid (62 mg, 66%).  $^1\text{H}$  NMR (500 MHz,  $\text{CD}_3\text{CN}$ )  $\delta$  7.50 (t,  $J$  = 8.5 Hz, 2H), 7.06 (t,  $J$  = 8.8 Hz, 2H), 5.58 (s, 1H).  $^{13}\text{C}$  NMR (126 MHz,  $\text{CD}_3\text{CN}$ )  $\delta$  162.4 (d,  $J$  = 243.9 Hz), 140.2 (d,  $J$  = 3.1 Hz), 129.0 (d,  $J$  = 8.2 Hz), 120.2, 114.5 (d,  $J$  = 21.3 Hz), 99.2.  $^{19}\text{F}$  NMR (376 MHz,  $\text{CD}_3\text{CN}$ )  $\delta$  -117.08 – -117.22 (m), -139.26 (q,  $J$  = 47.5 Hz).  $^{11}\text{B}$  NMR (128 MHz,  $\text{CD}_3\text{CN}$ )  $\delta$  1.74 (q,  $J$  = 49.6 Hz). HRMS: (ESI)  $[\text{M}]^-$  calc. for  $\text{C}_9\text{H}_5\text{BF}_4\text{N}^-$ , 214.0457, observed, 214.0453.

**(E)-3-(2-chlorophenyl)-3-(trifluoro- $\lambda^4$ -boraneyl)acrylonitrile, potassium salt (3j)**

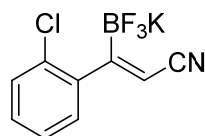

Prepared according to **Procedure 6.1**. White solid (57 mg, 64%).  $^1\text{H}$  NMR (600 MHz,  $\text{CD}_3\text{CN}$ )  $\delta$  7.35 (d,  $J$  = 7.9 Hz, 1H), 7.22 (d,  $J$  = 7.5 Hz, 1H), 7.17 (d,  $J$  = 7.6 Hz, 1H), 7.13 (d,  $J$  = 7.5 Hz, 1H), 5.39 (d,  $J$  = 8.1 Hz, 1H).  $^{13}\text{C}$  NMR (126 MHz,  $\text{CD}_3\text{CN}$ )  $\delta$

146.3, 132.7, 131.8, 131.5, 129.9, 120.5, 119.9, 112.6, 102.1 (d,  $J = 1.7$  Hz).  $^{19}\text{F}$  NMR (376 MHz,  $\text{CD}_3\text{CN}$ )  $\delta$  -141.16 (q,  $J = 45.6$  Hz).  $^{11}\text{B}$  NMR (128 MHz,  $\text{CD}_3\text{CN}$ )  $\delta$  1.21 (q,  $J = 47.8$  Hz). HRMS: (ESI)  $[\text{M}]^-$  calc. for  $\text{C}_9\text{H}_5\text{BClF}_3\text{N}^-$ , 230.0161, observed, 230.0154.

**(E)-3-(3-chlorophenyl)-3-(trifluoro- $\lambda^4$ -boraneyl)acrylonitrile, potassium salt (3k)**

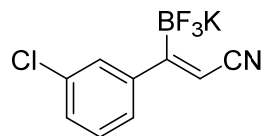

Prepared according to **Procedure 6.1**. White solid (46 mg, 72%).  $^1\text{H}$  NMR (600 MHz,  $\text{CD}_3\text{CN}$ )  $\delta$  7.48 (s, 1H), 7.38 (d,  $J = 7.3$  Hz, 1H), 7.34 – 7.25 (m, 2H), 5.61 (s, 1H).  $^{13}\text{C}$  NMR (151 MHz,  $\text{CD}_3\text{CN}$ )  $\delta$  146.3, 133.2, 129.5, 127.1, 126.9, 125.4, 119.8, 100.4.  $^{19}\text{F}$  NMR (376 MHz,  $\text{CD}_3\text{CN}$ )  $\delta$  -139.45 (q,  $J = 46.3$  Hz).  $^{11}\text{B}$  NMR (128 MHz,  $\text{CD}_3\text{CN}$ )  $\delta$  1.61 (q,  $J = 49.3$  Hz). HRMS: (ESI)  $[\text{M}]^-$  calc. for  $\text{C}_9\text{H}_5\text{BClF}_3\text{N}^-$ , 230.0161, observed, 230.0156.

**(E)-3-(4-chlorophenyl)-3-(trifluoro- $\lambda^4$ -boraneyl)acrylonitrile, potassium salt (3l)**

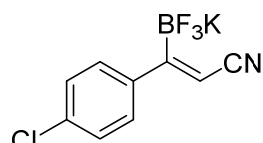

Prepared according to **Procedure 6.1**. White solid (40 mg, 61%).  $^1\text{H}$  NMR (600 MHz,  $\text{CD}_3\text{CN}$ )  $\delta$  7.45 (d,  $J = 8.5$  Hz, 2H), 7.32 (d,  $J = 8.5$  Hz, 2H), 5.61 – 5.57 (m, 1H).  $^{13}\text{C}$  NMR (151 MHz,  $\text{CD}_3\text{CN}$ )  $\delta$  142.8, 132.8, 128.7, 127.8, 120.0, 99.7.  $^{19}\text{F}$  NMR (376 MHz,  $\text{CD}_3\text{CN}$ )  $\delta$  -139.33 (q,  $J = 46.5$  Hz).  $^{11}\text{B}$  NMR (128 MHz,  $\text{CD}_3\text{CN}$ )  $\delta$  1.66 (q,  $J = 49.4$  Hz). HRMS: (ESI)  $[\text{M}]^-$  calc. for  $\text{C}_9\text{H}_5\text{BClF}_3\text{N}^-$ , 230.0161, observed, 230.0152.

**(E)-4-(2-cyano-1-(trifluoro- $\lambda^4$ -boraneyl)vinyl)benzonitrile, potassium salt (3m)**

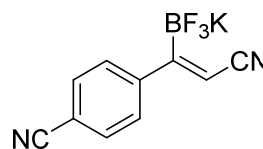

Prepared according to **Procedure 6.1**. White solid (43 mg, 85%).  $^1\text{H}$  NMR (500 MHz,  $\text{CD}_3\text{CN}$ )  $\delta$  7.70 – 7.64 (m, 2H), 7.61 – 7.55 (m, 2H), 5.65 – 5.62 (m, 1H).  $^{13}\text{C}$  NMR (126 MHz,  $\text{CD}_3\text{CN}$ )  $\delta$  149.2, 131.7, 127.7, 119.5, 119.0, 110.4, 101.5 (d,  $J = 1.7$  Hz), 29.9.  $^{19}\text{F}$  NMR (376 MHz,  $\text{CD}_3\text{CN}$ )  $\delta$  -139.58 (q,  $J = 46.5$  Hz).  $^{11}\text{B}$  NMR (128 MHz,  $\text{CD}_3\text{CN}$ )  $\delta$  1.55 (q,  $J = 48.8$  Hz). HRMS: (ESI)  $[\text{M}]^-$  calc. for  $\text{C}_{10}\text{H}_5\text{BF}_3\text{N}_2^-$ , 221.0498, observed, 221.0496.

**(E)-3-(2-cyano-1-(trifluoro- $\lambda^4$ -boraneyl)vinyl)benzonitrile, potassium salt (3n)**

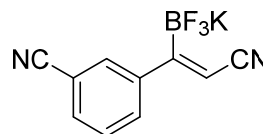

Prepared according to **Procedure 6.1**. White solid (67 mg, 73%).  $^1\text{H}$  NMR (500 MHz,  $\text{CD}_3\text{CN}$ )  $\delta$  7.75 (s, 1H), 7.72 (d,  $J = 7.8$  Hz, 1H), 7.60 (d,  $J = 7.7$  Hz, 1H), 7.45 (d,  $J = 7.8$  Hz, 1H), 5.61 (s, 1H).  $^{13}\text{C}$  NMR (126 MHz,  $\text{CD}_3\text{CN}$ )  $\delta$  145.3, 131.7, 130.8, 130.5, 128.9, 119.5, 118.9, 111.7, 101.1 (d,  $J = 1.8$  Hz).  $^{19}\text{F}$  NMR (376 MHz,  $\text{CD}_3\text{CN}$ )  $\delta$  -139.76 (q,  $J = 47.5$  Hz).  $^{11}\text{B}$  NMR (128 MHz,  $\text{CD}_3\text{CN}$ )  $\delta$  1.58 (q,  $J = 48.6$  Hz). HRMS: (ESI)  $[\text{M}]^-$  calc. for  $\text{C}_{10}\text{H}_5\text{BF}_3\text{N}_2^-$ , 221.0498, observed, 221.0496.

**(E)-3-(naphthalen-2-yl)-3-(trifluoro- $\lambda^4$ -boraneyl)acrylonitrile, potassium salt (3o)**

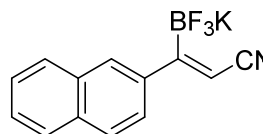

Prepared according to **Procedure 6.1**. White solid (63 mg, 89%).  $^1\text{H}$  NMR (400 MHz,  $\text{DMSO}-d_6$ )  $\delta$  8.13 – 7.71 (m, 4H), 7.71 – 7.33 (m, 3H), 5.72 (s, 1H).  $^{13}\text{C}$  NMR (101 MHz,  $\text{DMSO}-d_6$ )  $\delta$  141.7, 133.2, 132.8, 128.6, 127.7, 127.3, 126.3,



126.2, 126.1, 120.4, 99.9.  $^{19}\text{F}$  NMR (376 MHz,  $\text{DMSO-}d_6$ )  $\delta$  -136.05.  $^{11}\text{B}$  NMR (128 MHz,  $\text{DMSO-}d_6$ )  $\delta$  1.72 (q,  $J = 51.0$  Hz). HRMS: (ESI)  $[\text{M}]^-$  calc. for  $\text{C}_{13}\text{H}_8\text{BF}_3\text{N}^-$ , 246.0707, observed, 246.0703.

**(E)-3-(benzofuran-6-yl)-3-(trifluoro- $\lambda^4$ -boranyl)acrylonitrile, potassium salt (3p)**

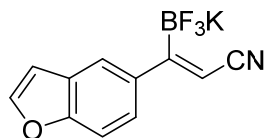

Prepared according to **Procedure 6.1**. White solid (90 mg, 46%).  $^1\text{H}$  NMR (600 MHz,  $\text{CD}_3\text{CN}$ )  $\delta$  7.73 (s, 1H), 7.71 (d,  $J = 2.2$  Hz, 1H), 7.43 (s, 2H), 6.84 (d,  $J = 2.2$  Hz, 1H), 5.59 (d,  $J = 6.7$  Hz, 1H).  $^{13}\text{C}$  NMR (151 MHz,  $\text{CD}_3\text{CN}$ )  $\delta$  154.6, 145.7, 139.1, 127.2, 123.9, 120.4, 119.9, 110.4, 106.9, 98.8.  $^{19}\text{F}$  NMR (376 MHz,  $\text{CD}_3\text{CN}$ )  $\delta$  -138.89 (d,  $J = 45.7$  Hz).  $^{11}\text{B}$  NMR (128 MHz,  $\text{CD}_3\text{CN}$ )  $\delta$  1.86 (q,  $J = 50.3$  Hz). HRMS: (ESI)  $[\text{M}]^-$  calc. for  $\text{C}_{11}\text{H}_6\text{BF}_3\text{NO}^-$ , 236.0500, observed, 236.0490.

**(E)-3-(benzo[d][1,3]dioxol-5-yl)-3-(trifluoro- $\lambda^4$ -boranyl)acrylonitrile, potassium salt (3q)**

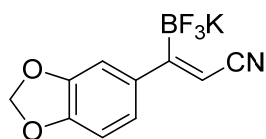

Prepared according to **Procedure 6.1**. White solid (35 mg, 62%).  $^1\text{H}$  NMR (400 MHz,  $\text{CD}_3\text{CN}$ )  $\delta$  7.08 – 7.00 (m, 2H), 6.81 (d,  $J = 8.5$  Hz, 1H), 5.97 (s, 2H), 5.56 (s, 1H).  $^{13}\text{C}$  NMR (101 MHz,  $\text{CD}_3\text{CN}$ )  $\delta$  147.3, 147.3, 138.1, 121.0, 120.4, 107.5, 107.4, 101.2, 98.0.  $^{19}\text{F}$  NMR (376 MHz,  $\text{CD}_3\text{CN}$ )  $\delta$  -138.83 (q,  $J = 46.4$  Hz).  $^{11}\text{B}$  NMR (128 MHz,  $\text{CD}_3\text{CN}$ )  $\delta$  1.72 (q,  $J = 49.5$  Hz). HRMS: (ESI)  $[\text{M}]^-$  calc. for  $\text{C}_{10}\text{H}_6\text{BF}_3\text{NO}_2^-$ , 240.0449, observed, 240.0442.

**(E)-3-([1,1'-biphenyl]-4-yl)-3-(trifluoro- $\lambda^4$ -boranyl)acrylonitrile, potassium salt (3r)**

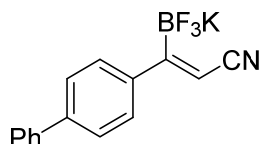

Prepared according to **Procedure 6.1**. White solid (42 mg, 88%).  $^1\text{H}$  NMR (400 MHz,  $\text{CD}_3\text{CN}$ )  $\delta$  7.69 – 7.62 (m, 2H), 7.58 (d,  $J = 8.7$  Hz, 2H), 7.54 (d,  $J = 8.5$  Hz, 2H), 7.46 (t,  $J = 7.4$  Hz, 2H), 7.36 (t,  $J = 7.9$  Hz, 1H), 5.63 (s, 1H).  $^{13}\text{C}$  NMR (126 MHz,  $\text{CD}_3\text{CN}$ )  $\delta$  144.9, 142.2, 141.4, 130.5, 129.2, 128.9, 128.4, 128.0, 121.8, 100.7.  $^{19}\text{F}$  NMR (376 MHz,  $\text{CD}_3\text{CN}$ )  $\delta$  -139.01 (q,  $J = 44.9$  Hz).  $^{11}\text{B}$  NMR (128 MHz,  $\text{CD}_3\text{CN}$ )  $\delta$  1.79 (q,  $J = 50.5$  Hz). HRMS: (ESI)  $[\text{M}]^-$  calc. for  $\text{C}_{15}\text{H}_{10}\text{BF}_3\text{N}^-$ , 272.0858 observed, 272.0868.

**(E)-7-([1,1'-biphenyl]-4-ylmethoxy)-3-(trifluoro- $\lambda^4$ -boranyl)hept-2-enenitrile, potassium salt (3s)**

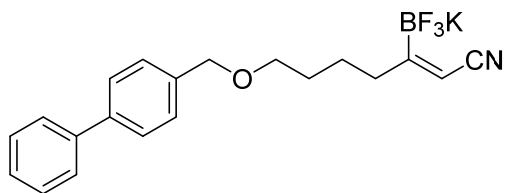

Prepared according to **Procedure 6.1**. White solid (46 mg, 81%).  $^1\text{H}$  NMR (500 MHz,  $\text{CD}_3\text{CN}$ )  $\delta$  7.68 – 7.59 (m, 4H), 7.48 – 7.40 (m, 4H), 7.36 (t,  $J = 7.3$  Hz, 1H), 5.37 (s, 1H), 4.52 (s, 2H), 3.54 – 3.45 (m, 2H), 2.37 (t,  $J = 7.4$  Hz, 2H), 1.67 – 1.52 (m, 4H).  $^{13}\text{C}$  NMR (126 MHz,  $\text{CD}_3\text{CN}$ )  $\delta$  141.57, 140.80, 139.39, 129.77, 129.06, 128.25, 127.77, 127.73, 97.87 – 96.98 (m), 72.83, 71.08, 35.41, 30.74, 26.19.  $^{19}\text{F}$  NMR (376 MHz,  $\text{CD}_3\text{CN}$ )  $\delta$  -145.71 (q,  $J = 52.9$  Hz).  $^{11}\text{B}$  NMR (128 MHz,  $\text{CD}_3\text{CN}$ )  $\delta$  1.84 (q,  $J = 52.8$  Hz). HRMS: (ESI)  $[\text{M}]^-$  calc. for  $\text{C}_{20}\text{H}_{20}\text{BF}_3\text{NO}^-$ , 358.1596 observed, 358.1595.

## 9. Procedure for Suzuki-Miyaura Cross-Coupling

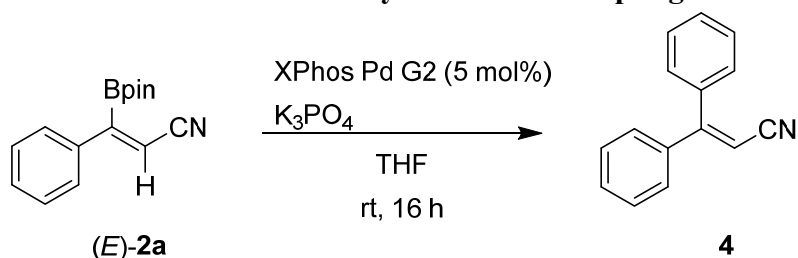

**Procedure 8.1.** An oven-dried round bottom flask was charged with (*E*)-**2a** (1 equiv, 0.10 mmol) and XPhos Pd G2 (6  $\mu$ mol, 0.05 equiv) and placed under N<sub>2</sub> via Schlenk technique. The reaction was diluted with THF (1 mL). Aqueous K<sub>3</sub>PO<sub>4</sub> (0.6 M, 0.2 mmol, 1.6 equiv) and bromobenzene (0.18 mmol, 1.5 equiv) were added, and the reaction was stirred at room temperature overnight. Upon completion, the reaction was quenched with water (15 mL) and diluted with diethyl ether (10 mL). The organic layer was washed with brine (10 mL) and dried over anhydrous sodium sulfate. Concentration *in vacuo* yielded a brown oil which upon purification by silica gel column chromatography (1% ethyl acetate:hexanes solvent system) yielded the product as a white solid.

## 10. Characterization for 3,3-diphenylacrylonitrile (**4**)

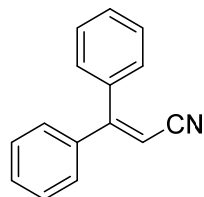

White Solid. 50% (12 mg). The spectra for compound **4** are in accordance with *J. Org. Chem.* **2020**, *85*, 2654-2665.

## 11. Procedure for Oxidation of (*E*)-1,2-vinylcyanoborane

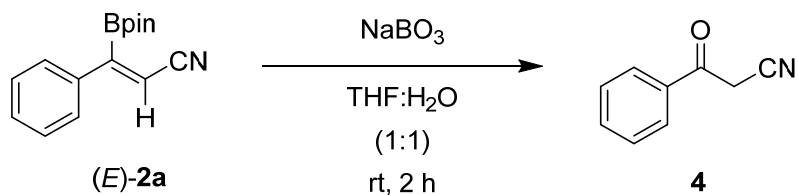

**Procedure 10.1.** An oven-dried round bottom flask was charged with (*E*)-**2a** (1 equiv, 0.40 mmol) and placed under N<sub>2</sub> via Schlenk technique. The reaction was diluted with THF (0.25 mL), and a solution of Sodium perborate monohydrate (0.59 mmol, 1.5 equiv) in water (0.25 mL) was added. The reaction was stirred at room temperature for 2 hours. Upon completion, the reaction was quenched with water (15 mL) and diluted with diethyl ether (10 mL). The organic layer was washed with brine (10 mL) and dried over anhydrous sodium sulfate. Concentration *in vacuo* yielded a brown oil which upon purification by silica gel column chromatography (10% ethyl acetate:hexanes solvent system) yielded the products as a white solid.

## 12. Characterization for 3-oxo-3-phenylpropanenitrile (5)

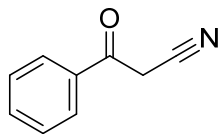

White solid. 69% (39 mg). The spectra for compound **5** are in accordance with *Org. Lett.* **2006**, *8*, 1161-1163.

Compounds **1n**, **1p**, **1s**, **2a** and **3a-s** are new and first time characterized.

## 13. General Procedure For NMR Studies

**Procedure 13.1.** An oven-dried 2-dram vial was charged with **1a** (1 equiv, 80  $\mu$ mol) and placed under N<sub>2</sub> via Schlenk technique. The solid was dissolved in CDCl<sub>3</sub> (0.75 mL), and BF<sub>3</sub>•OEt<sub>2</sub> (1 equiv, 80  $\mu$ mol) was added. Triphenylphosphine (1 equiv, 80  $\mu$ mol) was added in one portion, and the solution was transferred to an NMR tube. <sup>31</sup>P NMR data was immediately obtained.

**Procedure 13.2.** An oven-dried 2-dram vial was charged with **1a** (1 equiv, 80  $\mu$ mol) and placed under N<sub>2</sub> via Schlenk technique. The solid was dissolved in CDCl<sub>3</sub> (0.75 mL), and pinacolborane (1 equiv, 80  $\mu$ mol) was added. Triphenylphosphine (1 equiv, 80  $\mu$ mol) was added in one portion, and the solution was transferred to an NMR tube. <sup>13</sup>C NMR data was obtained every 30 minutes.

**Procedure 13.3.** An oven-dried 2-dram vial was charged with **1a** (1 equiv, 80  $\mu$ mol) and placed under N<sub>2</sub> via Schlenk technique. The solid was dissolved in CDCl<sub>3</sub> (0.75 mL), and pinacolborane (1 equiv, 80  $\mu$ mol) was added. The mixture was cooled to -40 °C and Tributylphosphine (1 equiv, 80  $\mu$ mol) was added, and the solution was transferred to an NMR tube. <sup>13</sup>C NMR data was obtained at -20 °C after 30 minutes.

## 14. X-Ray Crystallography Experimental

Colorless crystals were grown by slow diffusion using a acetonitrile/diethyl ether solvent system. The diffusion chamber (2 dram vial containing one isomer of **3a** dissolved in about 0.5 mL of acetonitrile inserted into a 6 dram vial containing about 10 mL of diethyl ether) was stored at room temperature for 7 days.

A colorless prism (0.07 x 0.19 x 0.21 mm<sup>3</sup>) was centered on the goniometer of a Rigaku Oxford Diffraction Synergy-S diffractometer equipped with a HyPix6000HE detector and operating with CuK $\alpha$  radiation. The data collection routine, unit cell refinement, and data processing were carried out with the program CrysAlisPro. The Laue symmetry and systematic absences were consistent with the monoclinic space group P21/c. The structure was solved using SHELXT and refined using SHELXL via Olex2. The final refinement model involved anisotropic displacement parameters for non-hydrogen atoms and a riding model for all hydrogen atoms: Olex2 and Mercury were used for molecular graphics generation.

## 15. References

1. J. Panteleev, R. Y. Huang, E. K. J. Lui and M. Lautens, *Org. Lett.*, 2011, **13**, 5314-5317.
2. A. S. K. Hashmi, P. Haufe and A. Rivas Nass, *Adv. Synth. Catal.*, 2003, **345**, 1237-1241.
3. J.-M. Vatèle, *Synlett*, 2014, **25**, 1275-1278.

## 16. NMR Spectra of Propiolonitriles

### <sup>1</sup>H NMR (CDCl<sub>3</sub> 400 MHz) of 1n

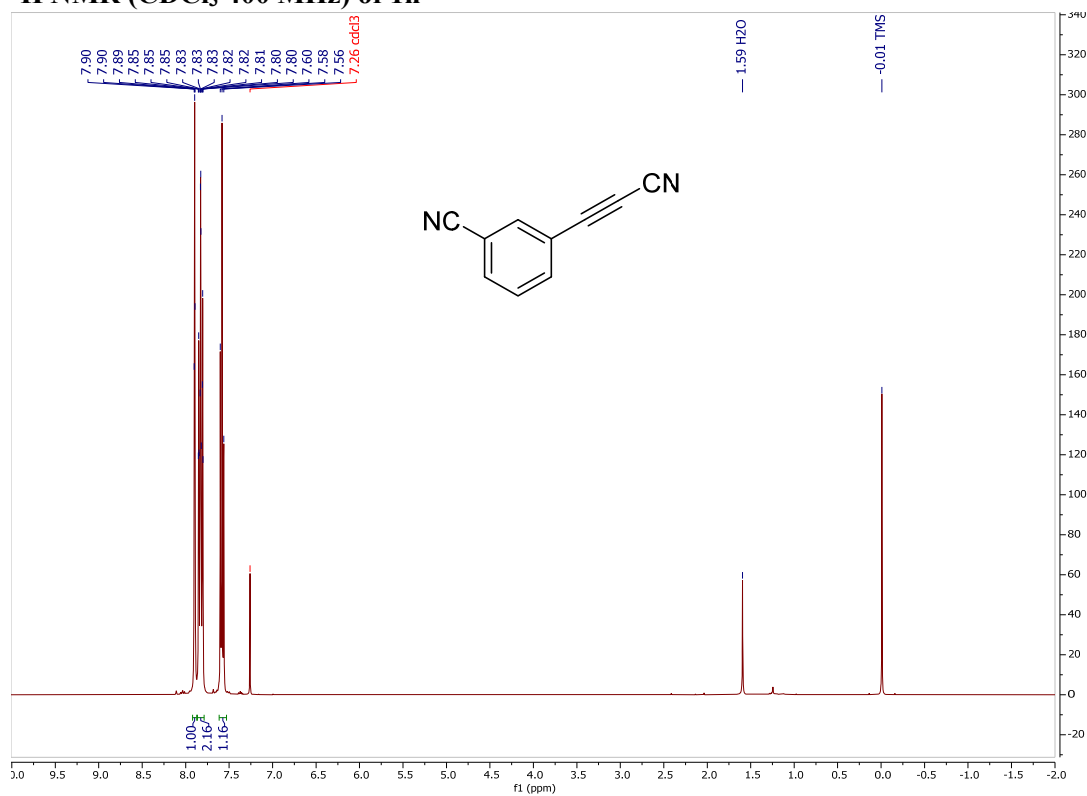

### <sup>13</sup>C NMR (CDCl<sub>3</sub> 100 MHz) of 1n

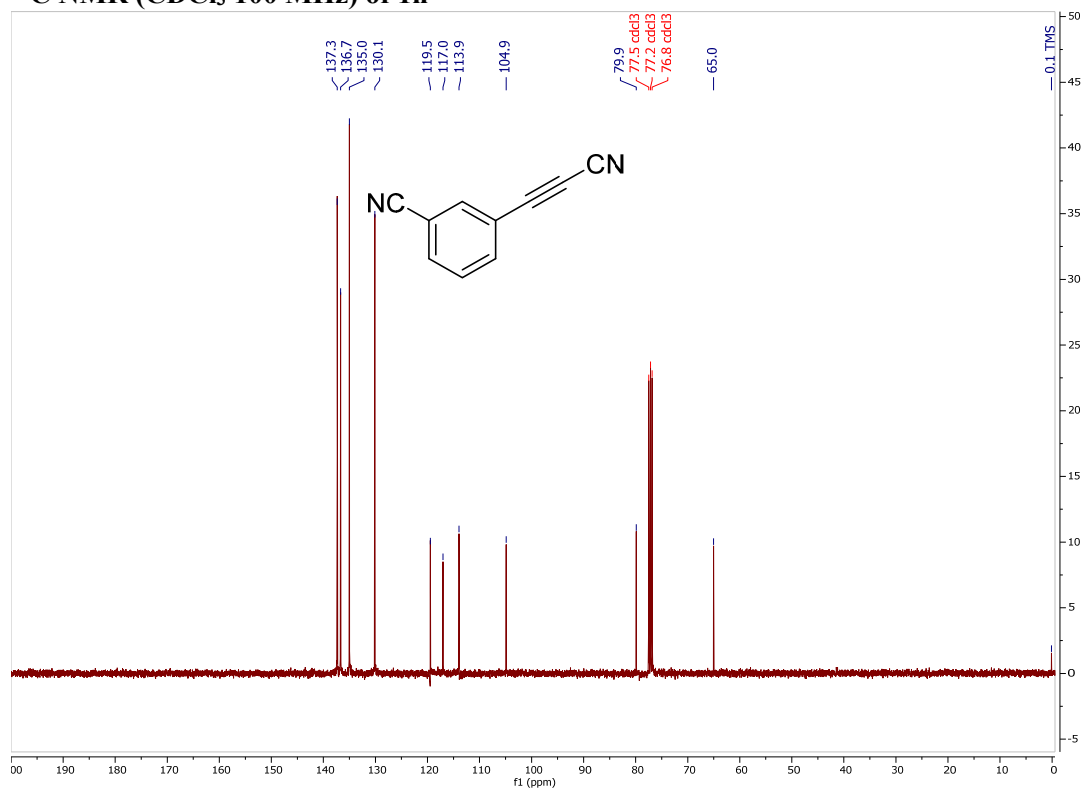

**<sup>1</sup>H NMR (CDCl<sub>3</sub> 400 MHz) of 1p**

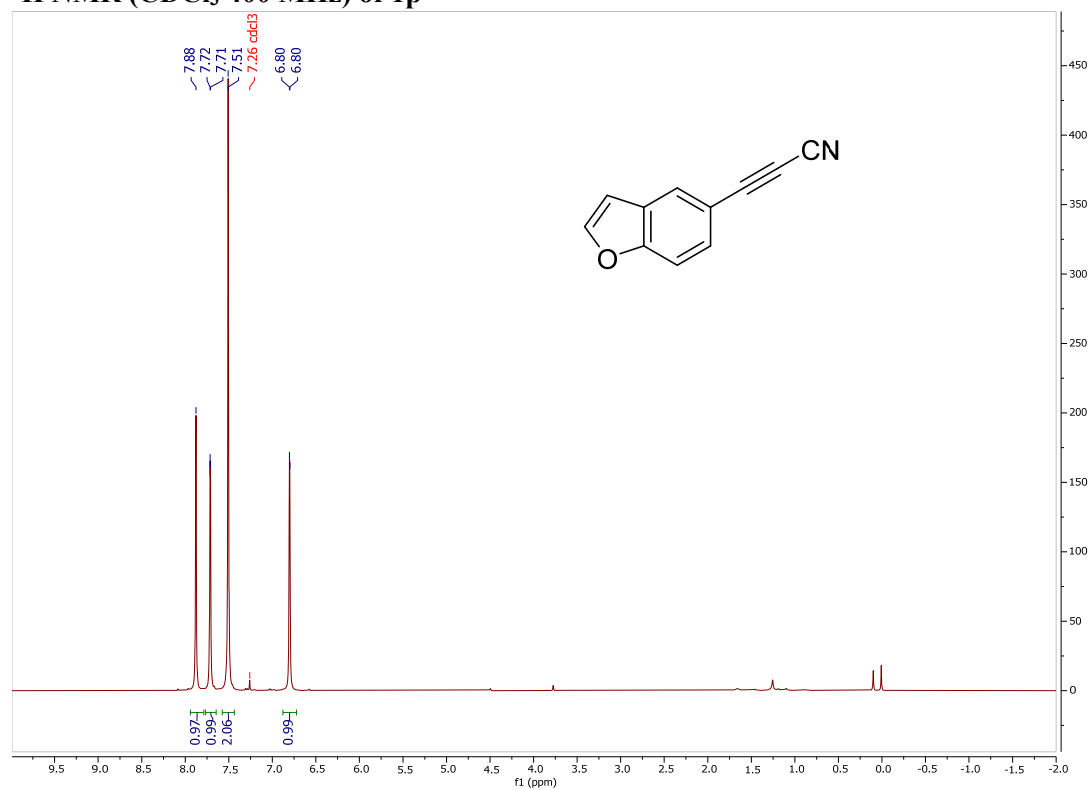

**<sup>13</sup>C NMR (CDCl<sub>3</sub> 100 MHz) of 1p**

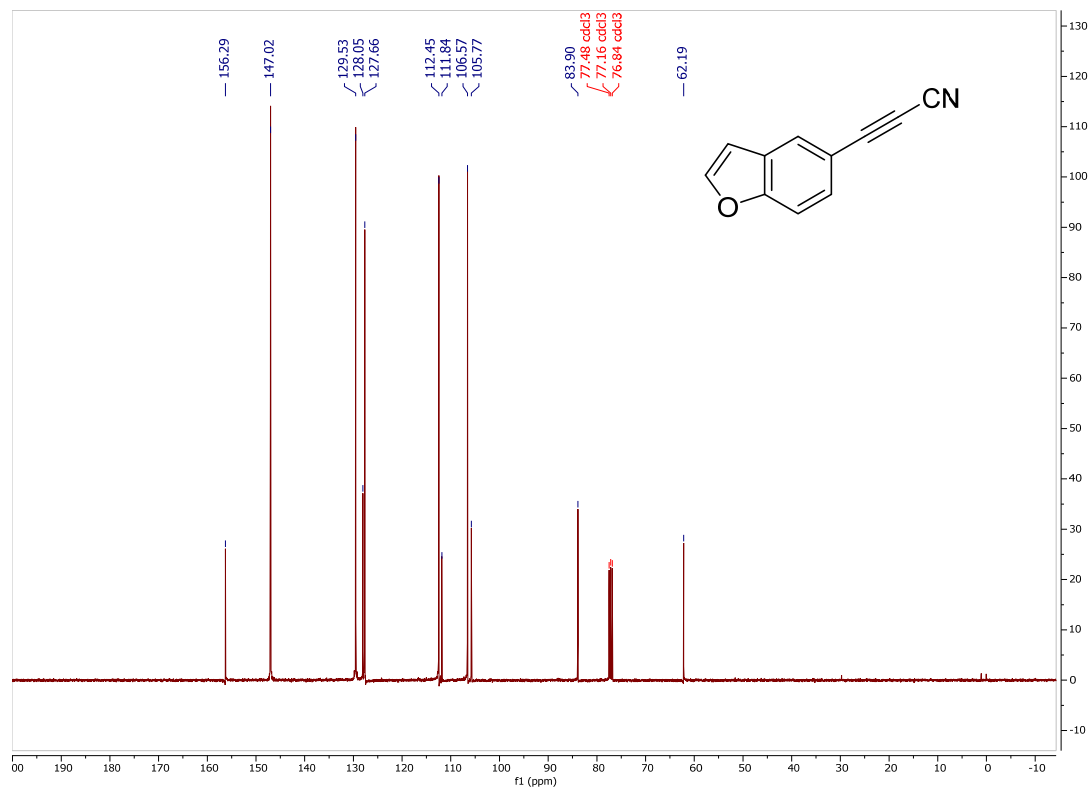

**<sup>1</sup>H NMR (CDCl<sub>3</sub> 400 MHz) of 1s**

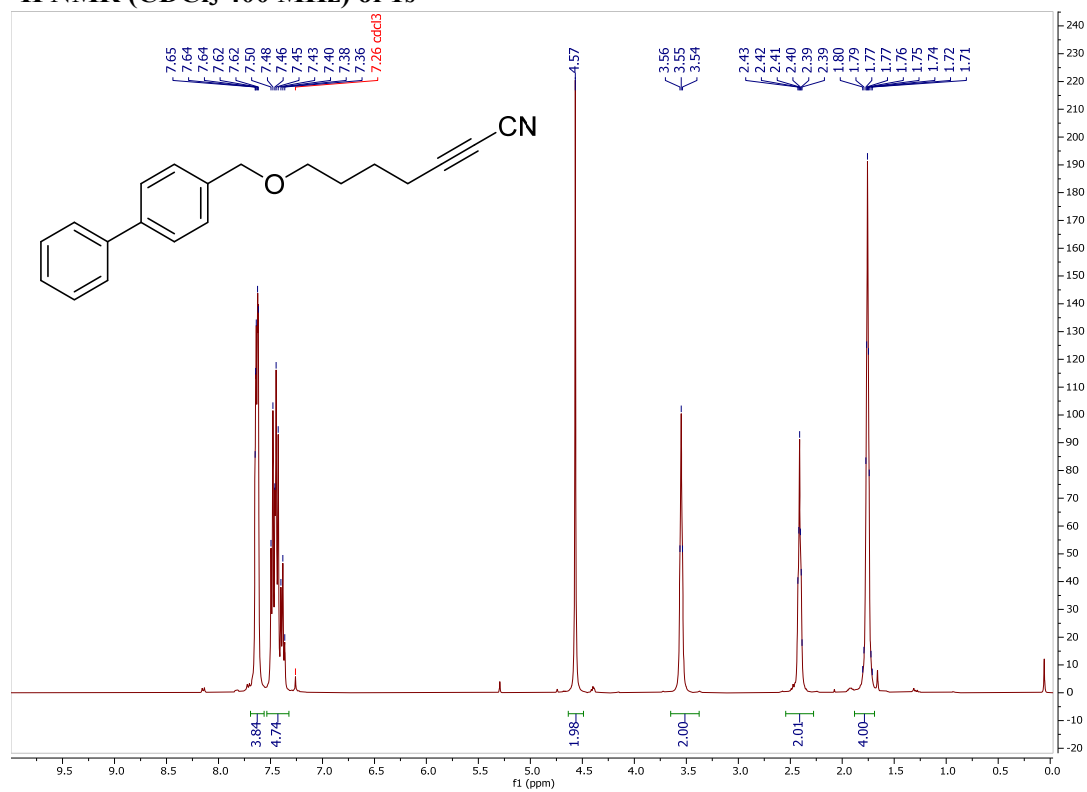

**<sup>13</sup>C NMR (CDCl<sub>3</sub> 100 MHz) of 1s**

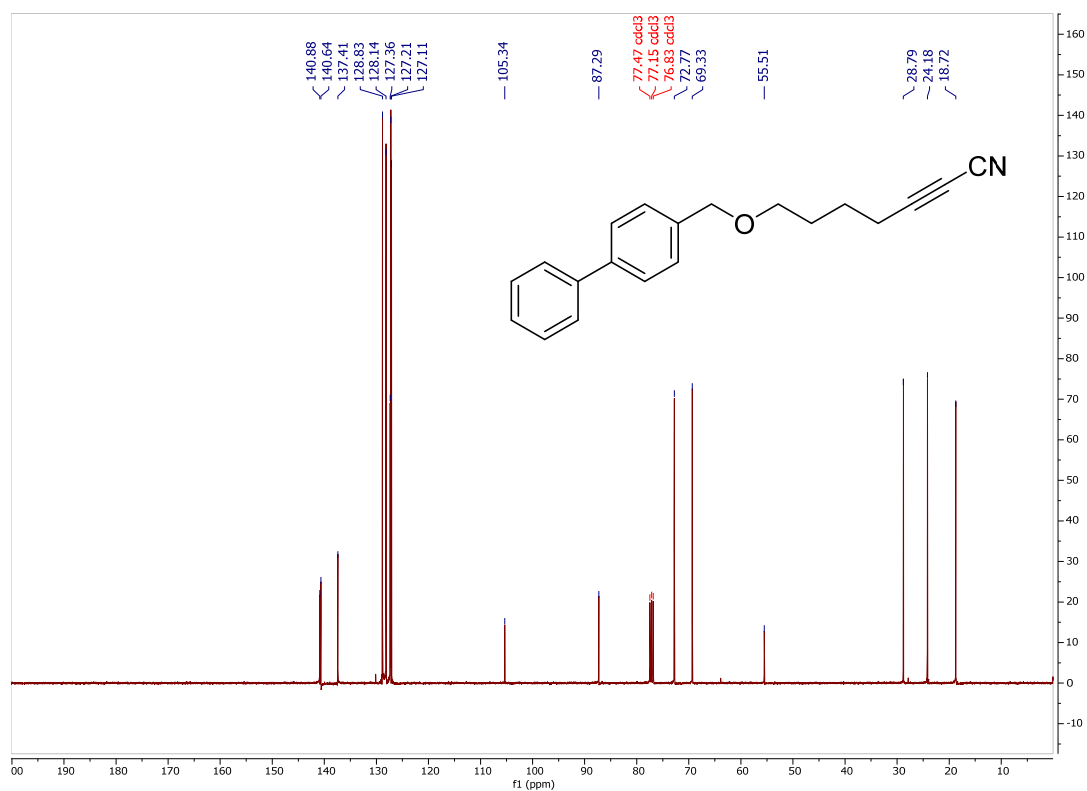

## 17. NMR Spectra of Crude 1,2-vinylcyanoboranes

Crude <sup>1</sup>H NMR (CDCl<sub>3</sub> 400 MHz) of 2a

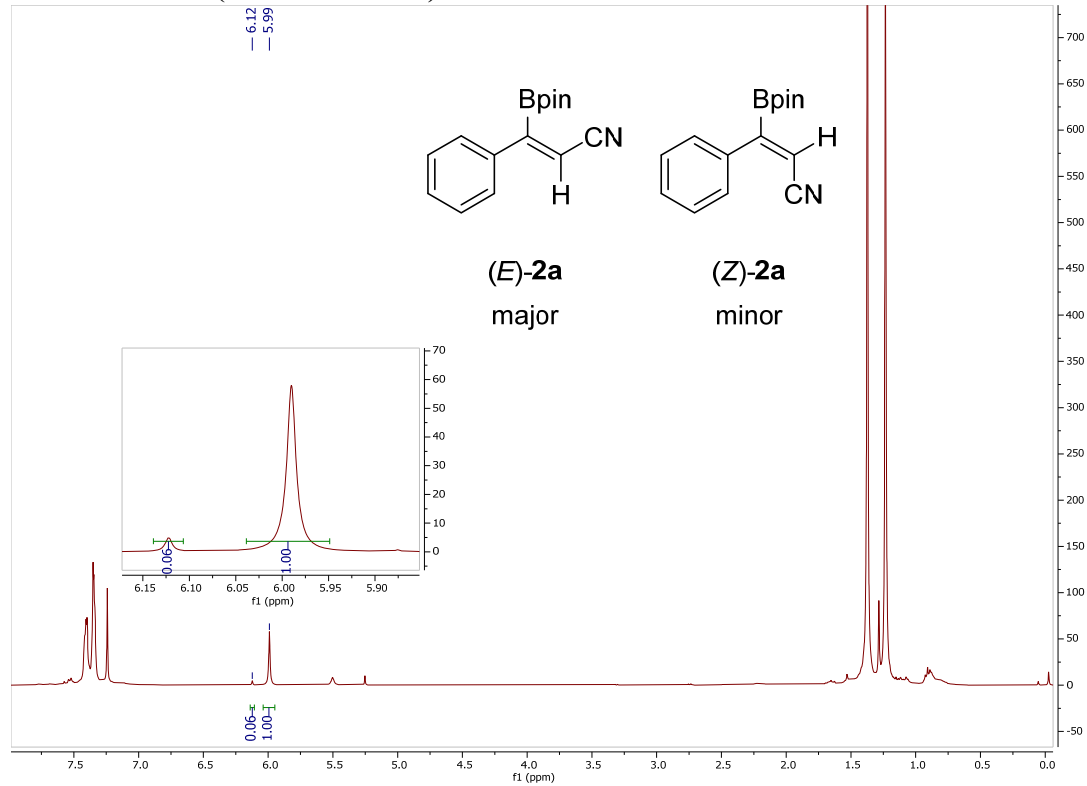

1D NOESY (CDCl<sub>3</sub> 400 MHz) Experiment for 2a

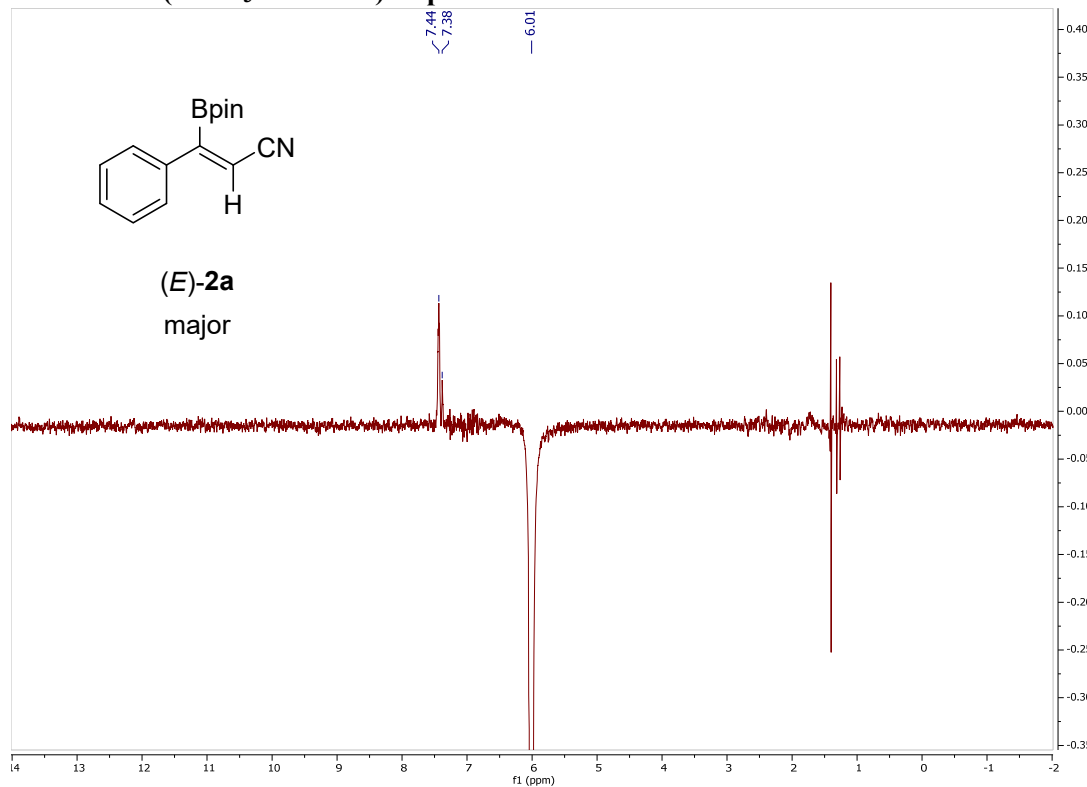

Crude  $^1\text{H}$  NMR ( $\text{CDCl}_3$  400 MHz) of 2b

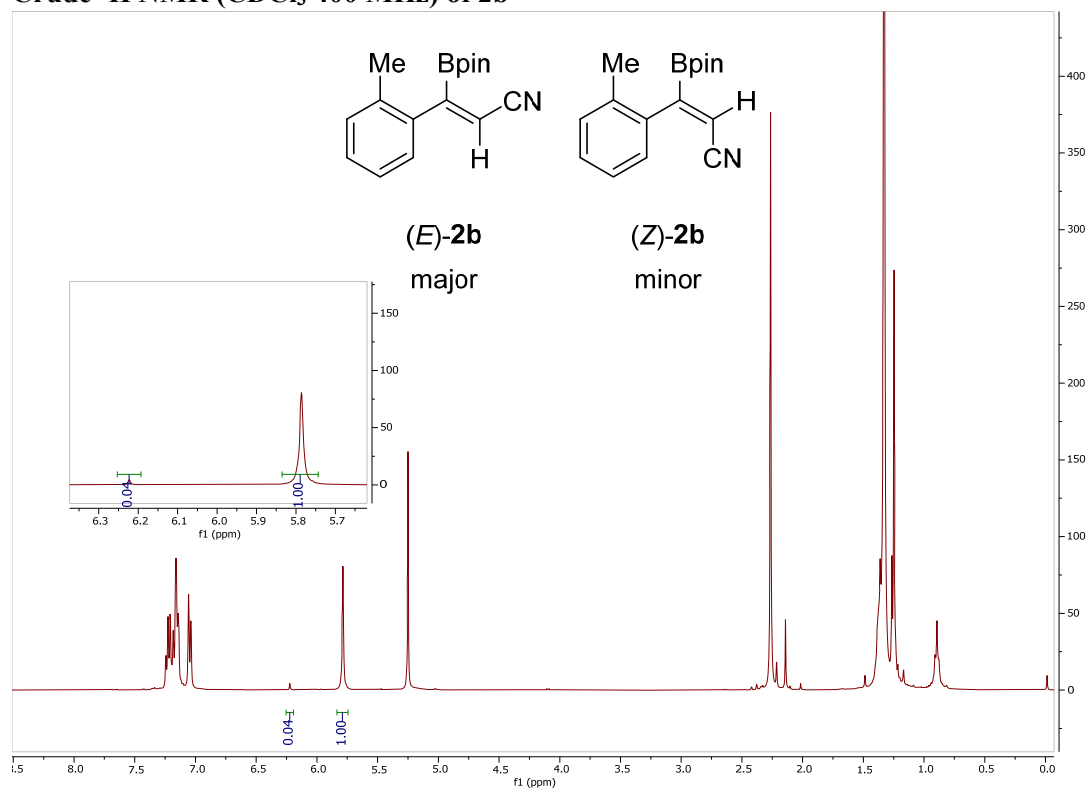

Crude  $^1\text{H}$  NMR ( $\text{CDCl}_3$  400 MHz) of 2c

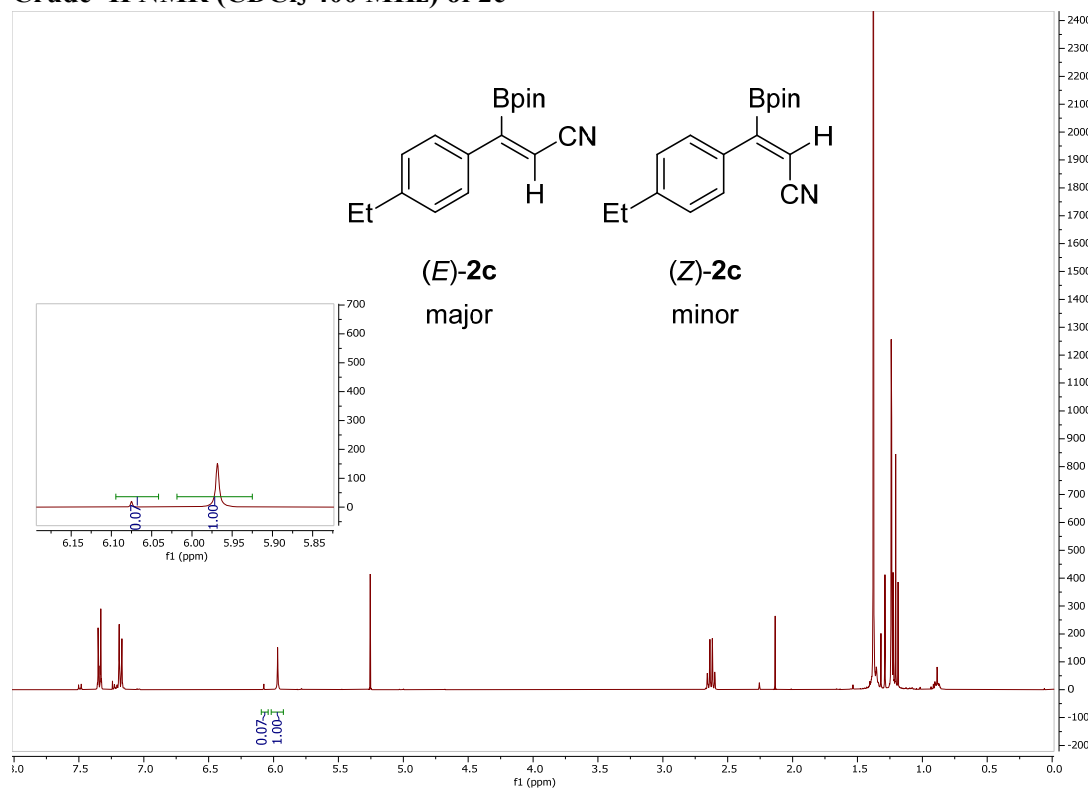



Crude <sup>1</sup>H NMR (CDCl<sub>3</sub> 400 MHz) of 2d

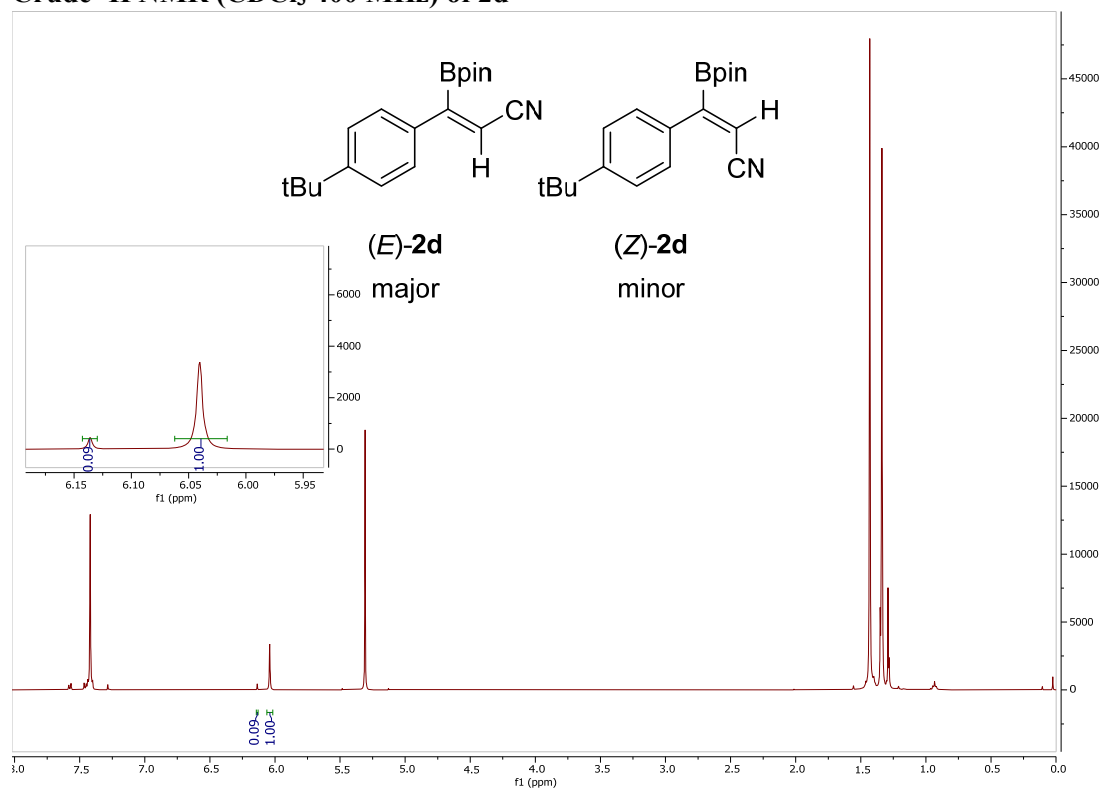

Crude <sup>1</sup>H NMR (CDCl<sub>3</sub> 400 MHz) of 2e

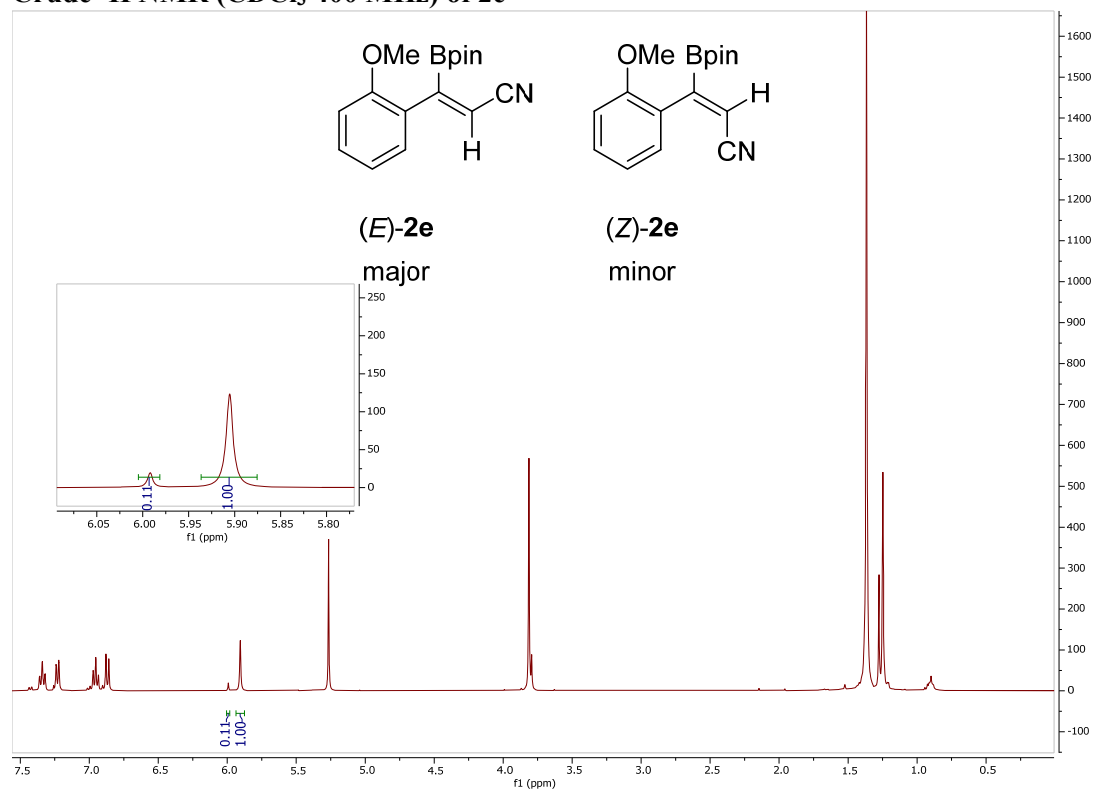

Crude  $^1\text{H}$  NMR ( $\text{CDCl}_3$  400 MHz) of 2f

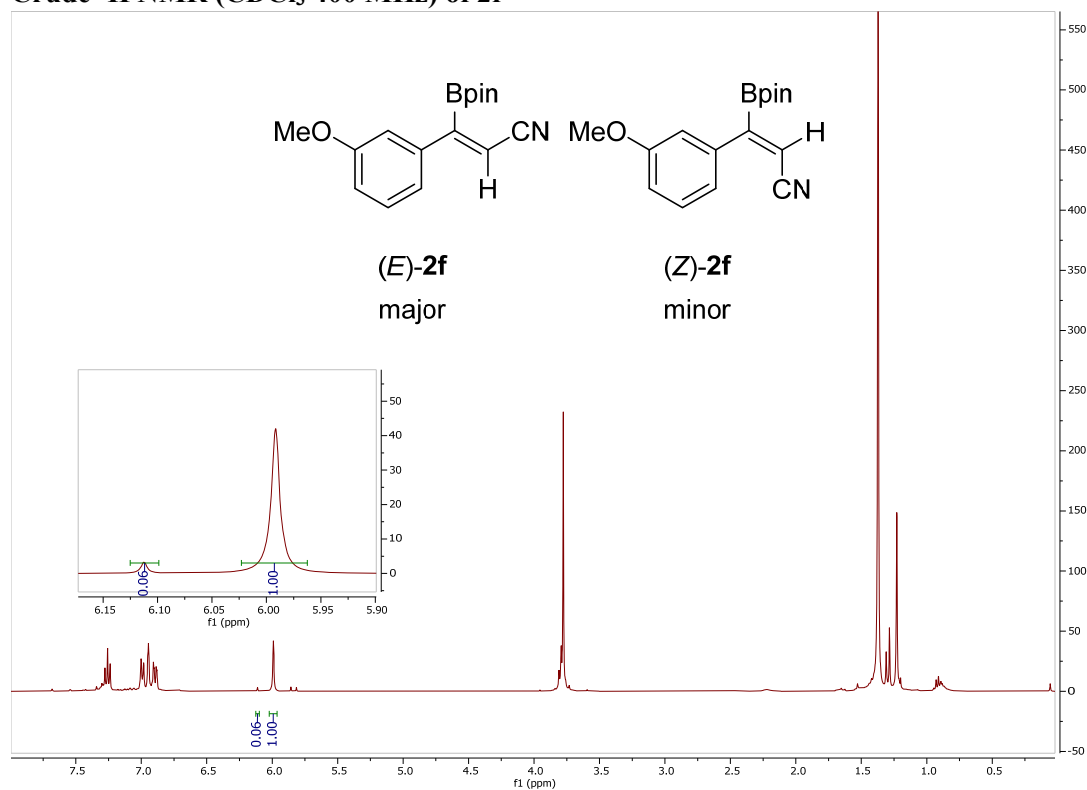

Crude  $^1\text{H}$  NMR ( $\text{CDCl}_3$  400 MHz) of 2g

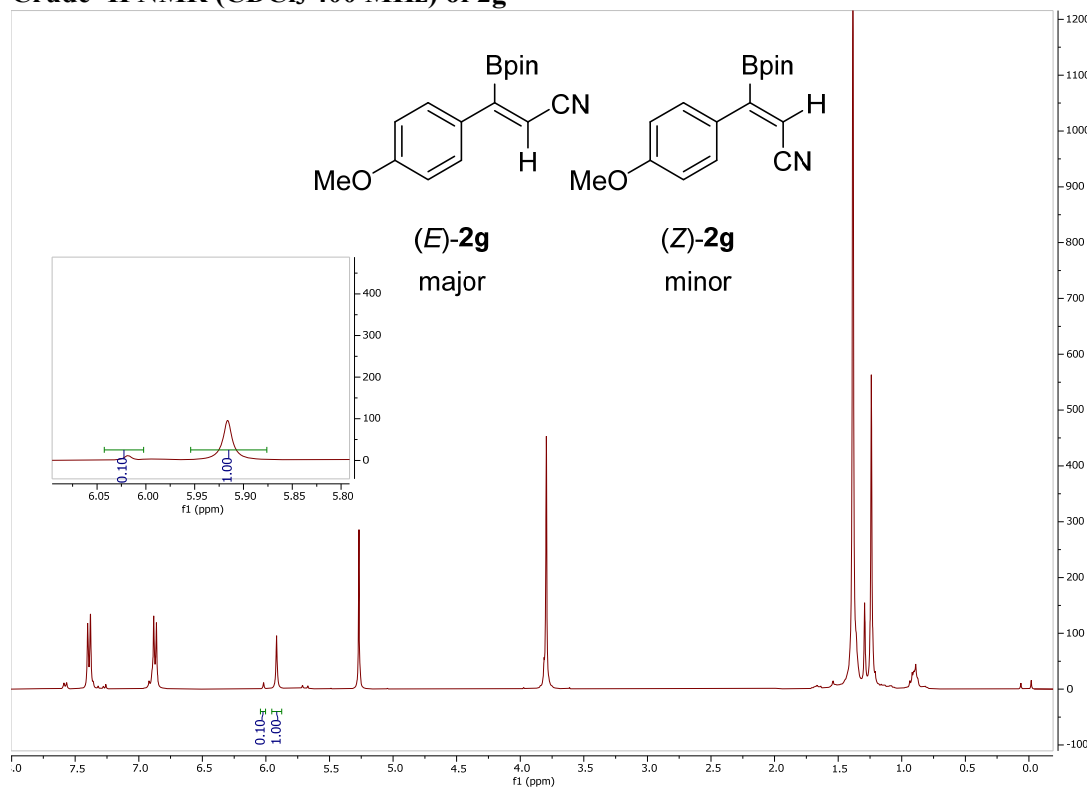

Crude  $^1\text{H}$  NMR ( $\text{CDCl}_3$  400 MHz) of 2h

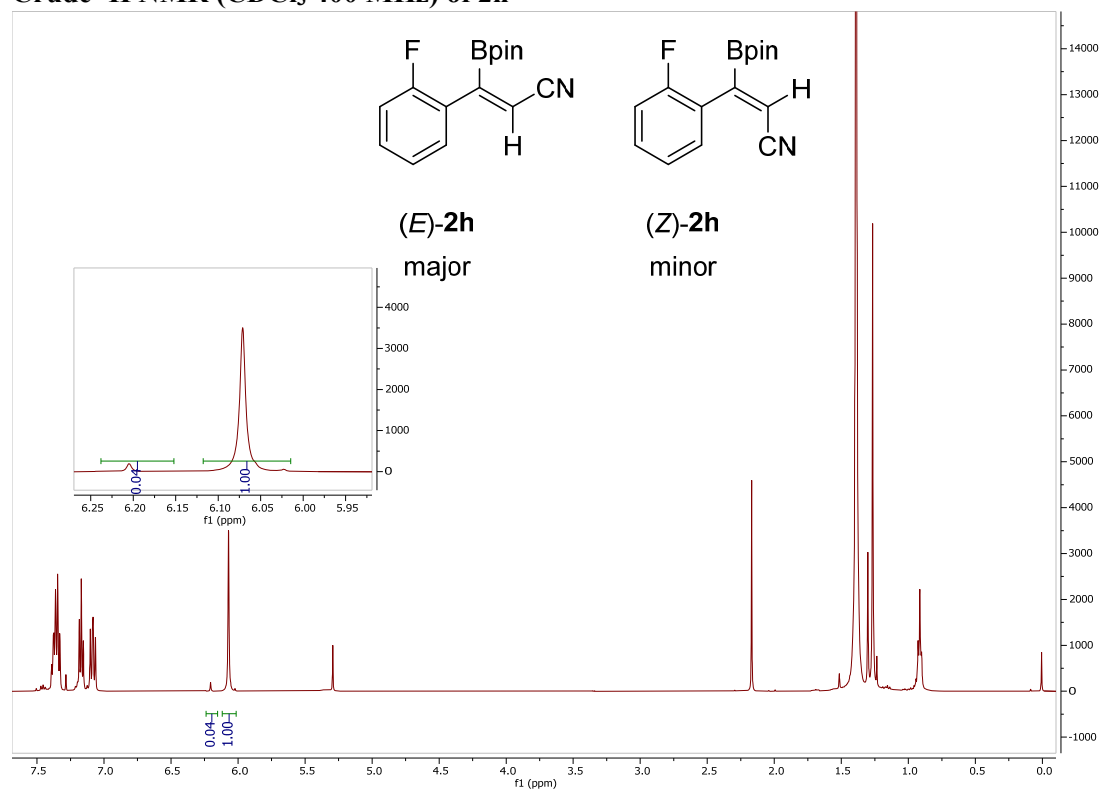

Crude  $^1\text{H}$  NMR ( $\text{CDCl}_3$  400 MHz) of 2i

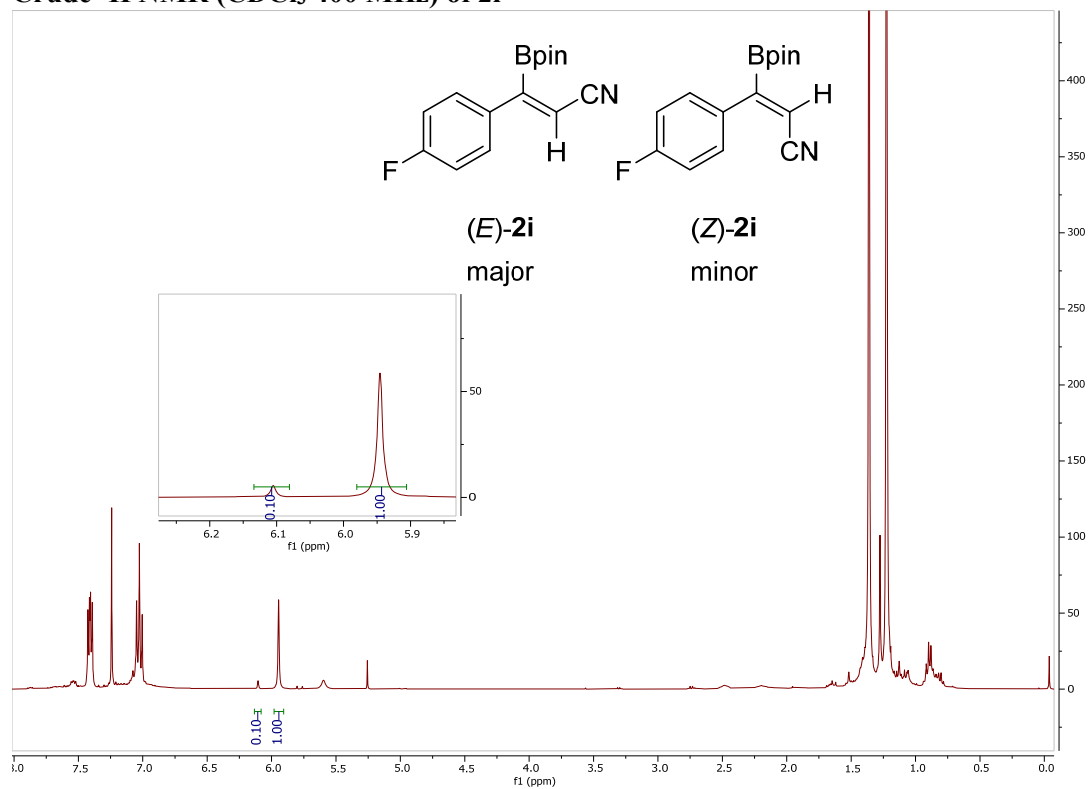

Crude  $^1\text{H}$  NMR ( $\text{CDCl}_3$  400 MHz) of 2j

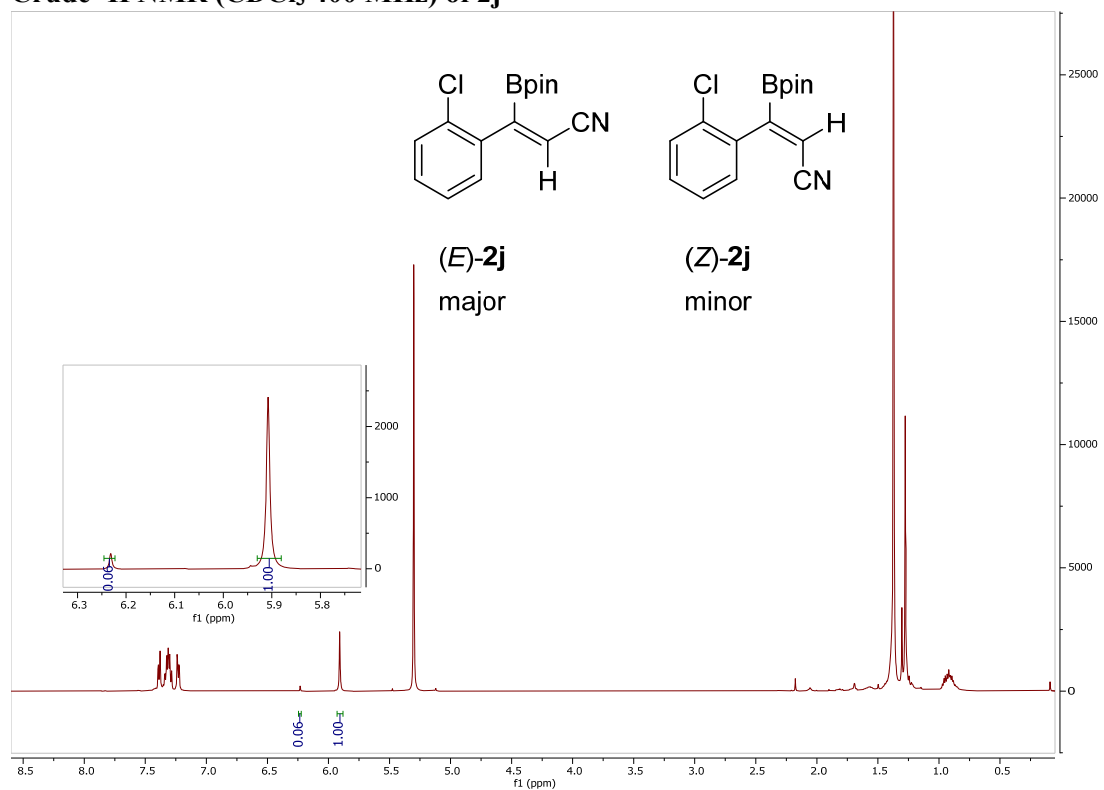

Crude  $^1\text{H}$  NMR ( $\text{CDCl}_3$  400 MHz) of 2k

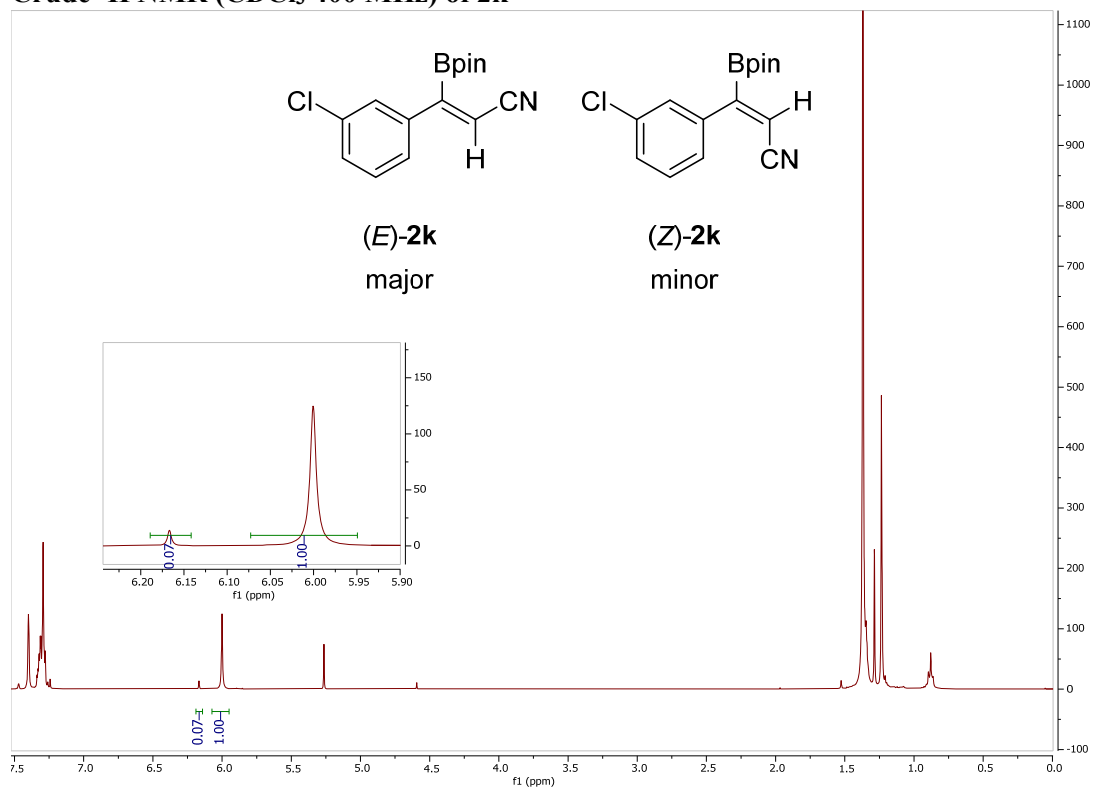

Crude <sup>1</sup>H NMR (CDCl<sub>3</sub> 400 MHz) of 2l

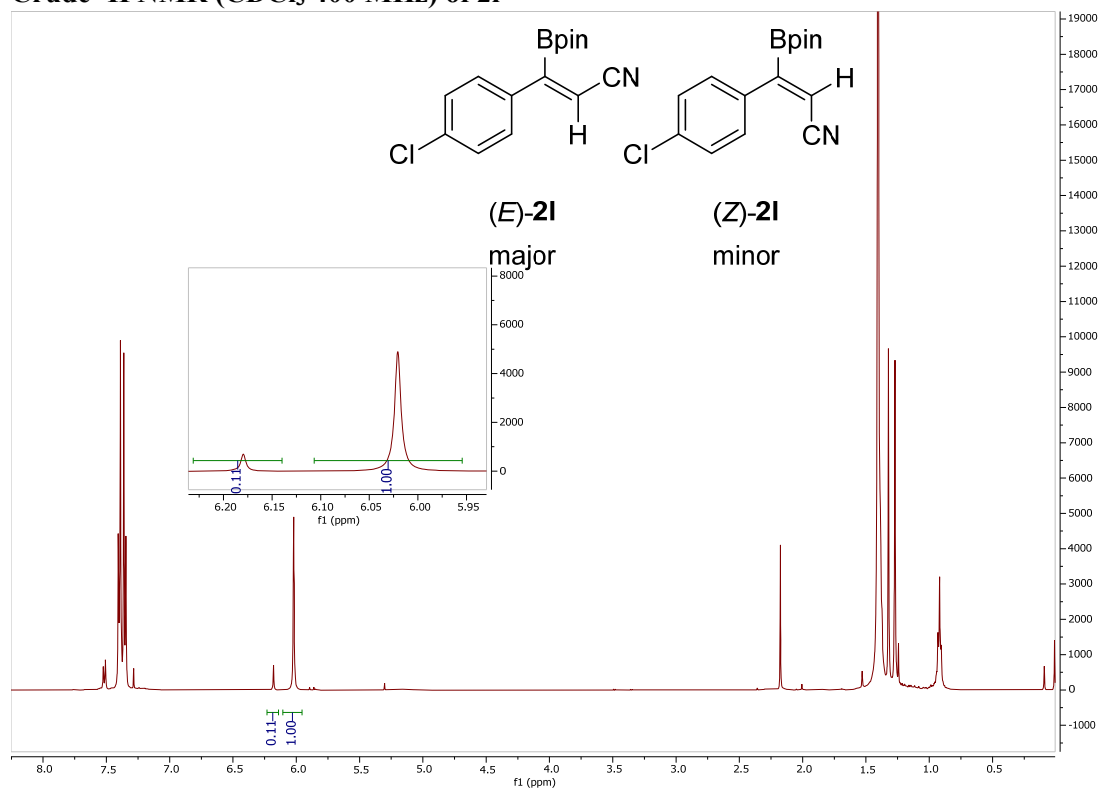

Crude <sup>1</sup>H NMR (CDCl<sub>3</sub> 400 MHz) of 2m

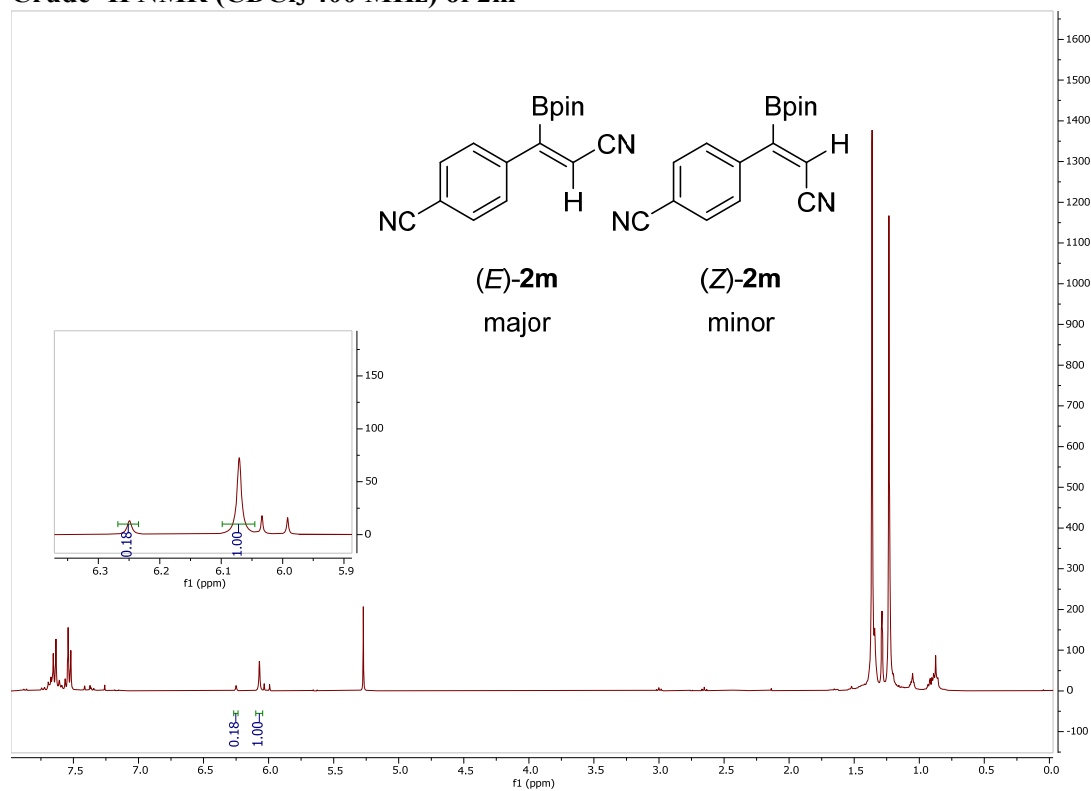

Crude  $^1\text{H}$  NMR ( $\text{CDCl}_3$  400 MHz) of **2n**

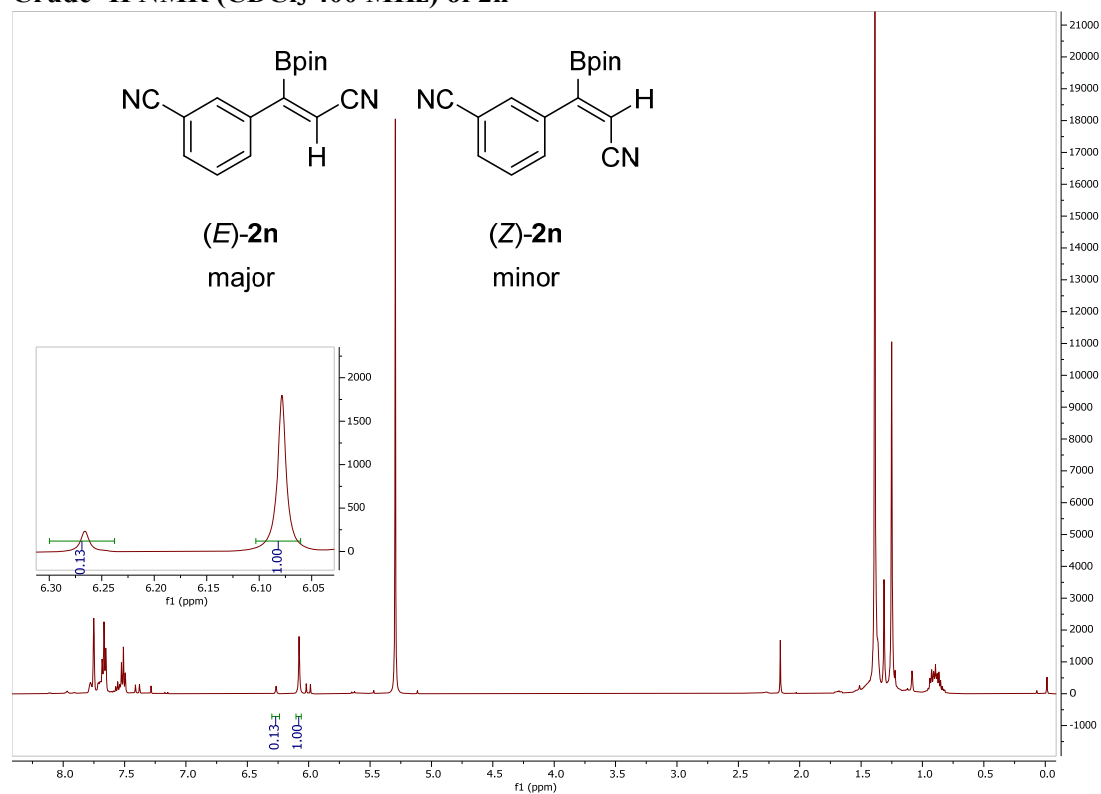

Crude  $^1\text{H}$  NMR ( $\text{CDCl}_3$  400 MHz) of **2o**

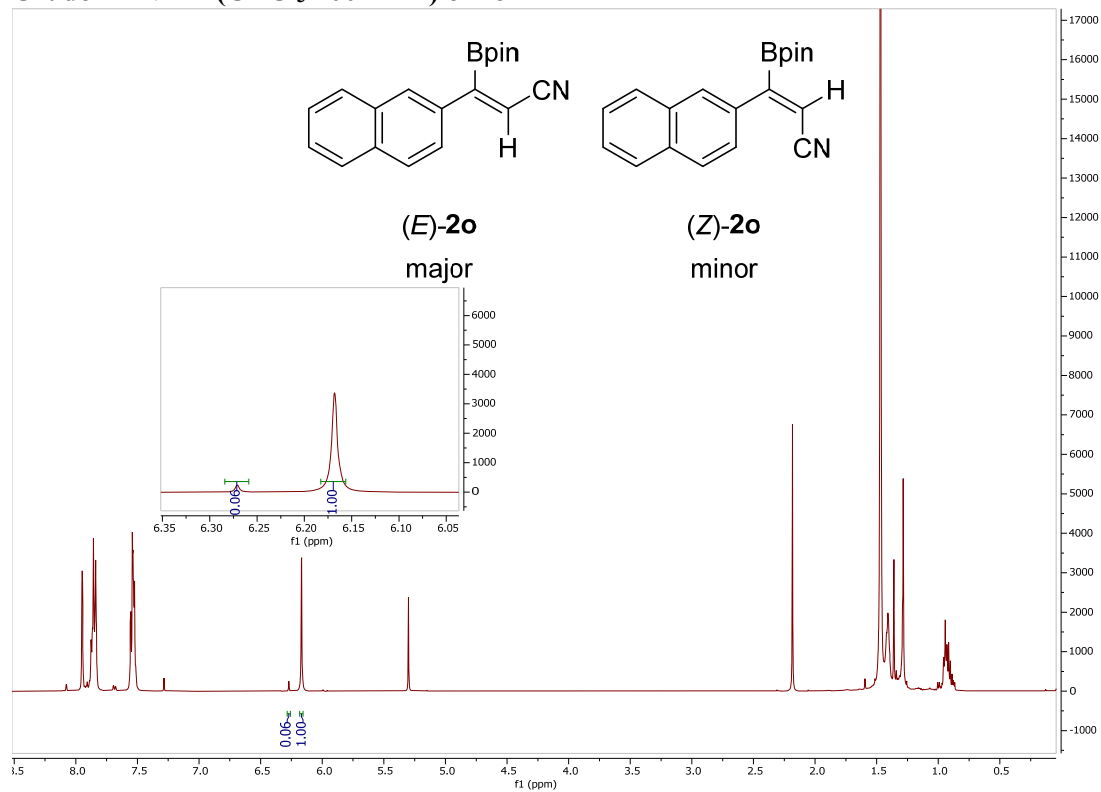

Crude <sup>1</sup>H NMR (CDCl<sub>3</sub> 400 MHz) of 2p

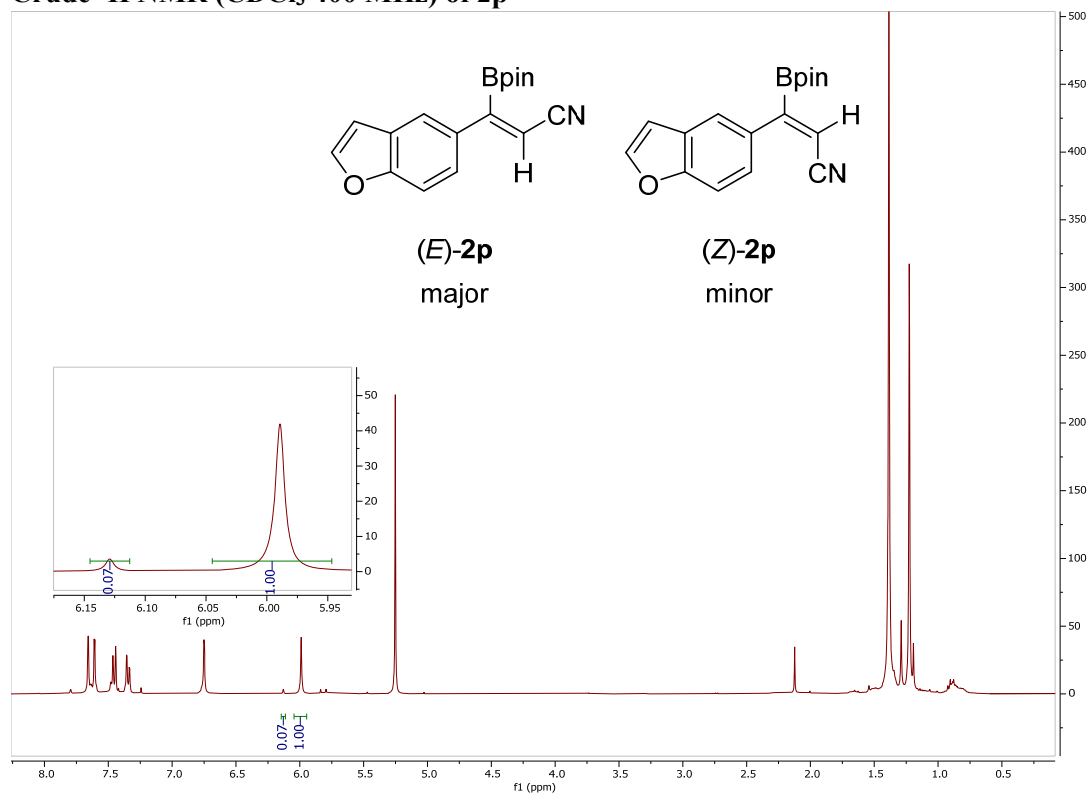

Crude <sup>1</sup>H NMR (CDCl<sub>3</sub> 400 MHz) of 2r

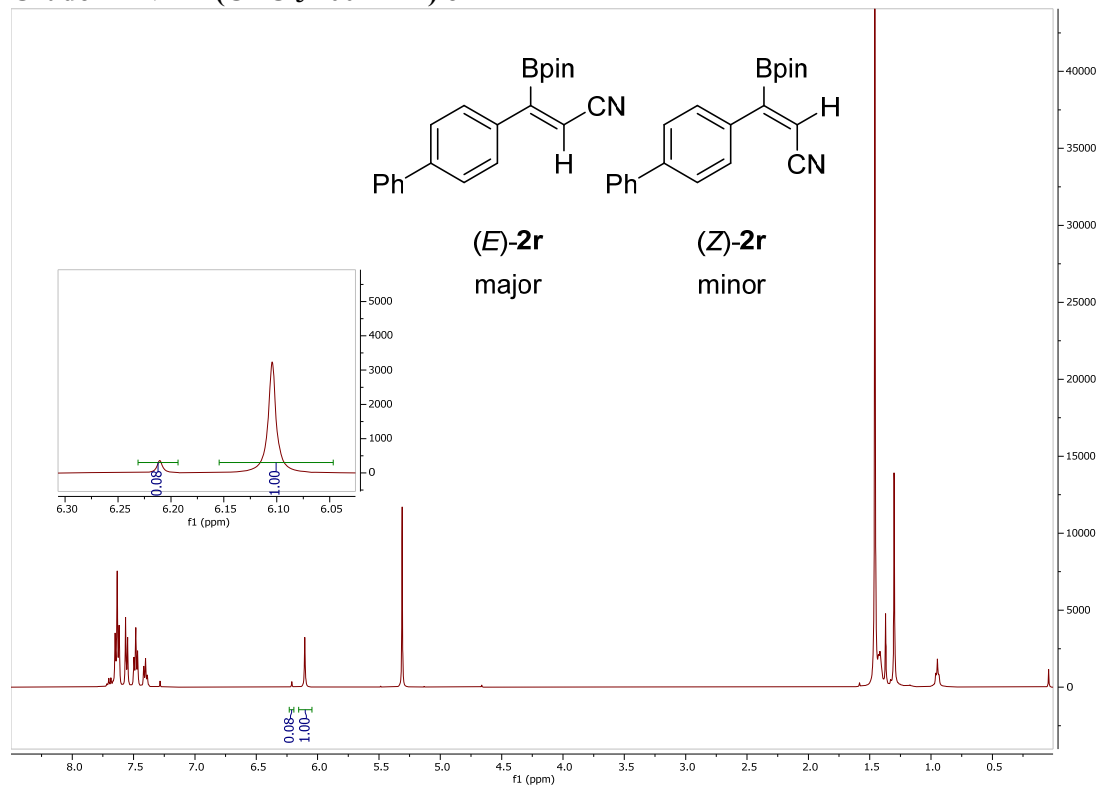

### Crude $^1\text{H}$ NMR ( $\text{CDCl}_3$ 400 MHz) of 2s

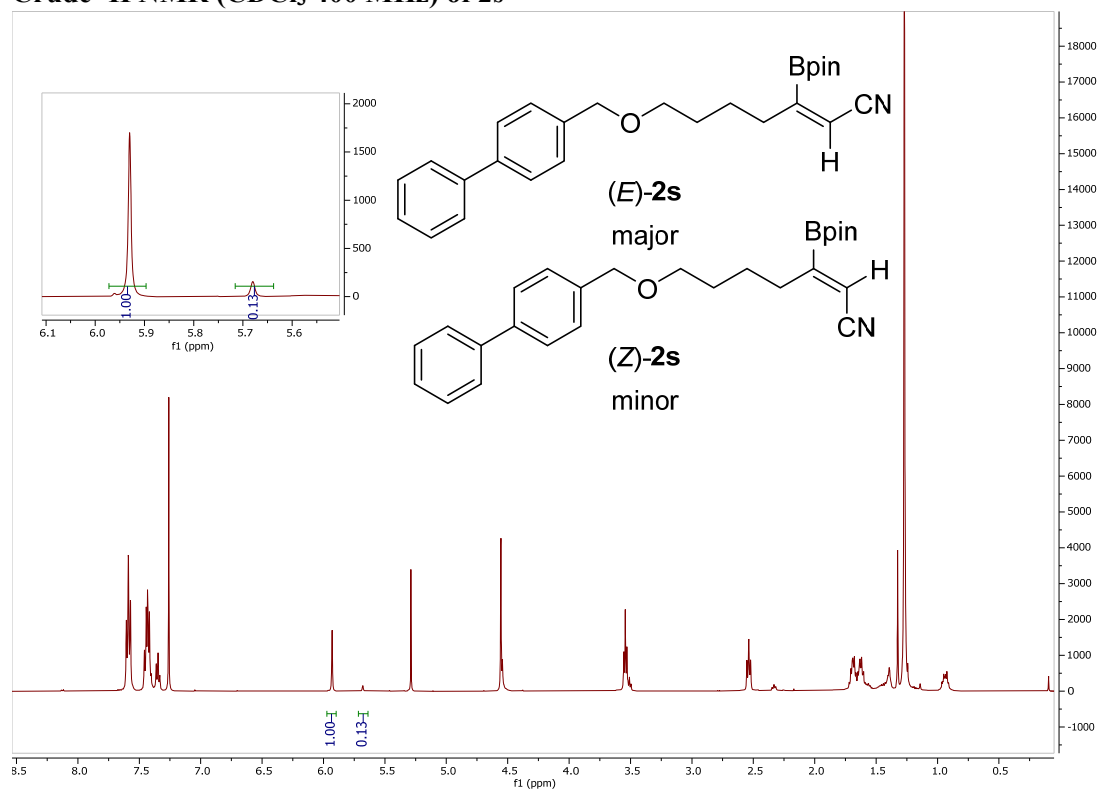

### 18. NMR Spectra of 1,2-vinylcyanoboronate esters

#### $^1\text{H}$ NMR ( $\text{CDCl}_3$ 400 MHz) of 2a

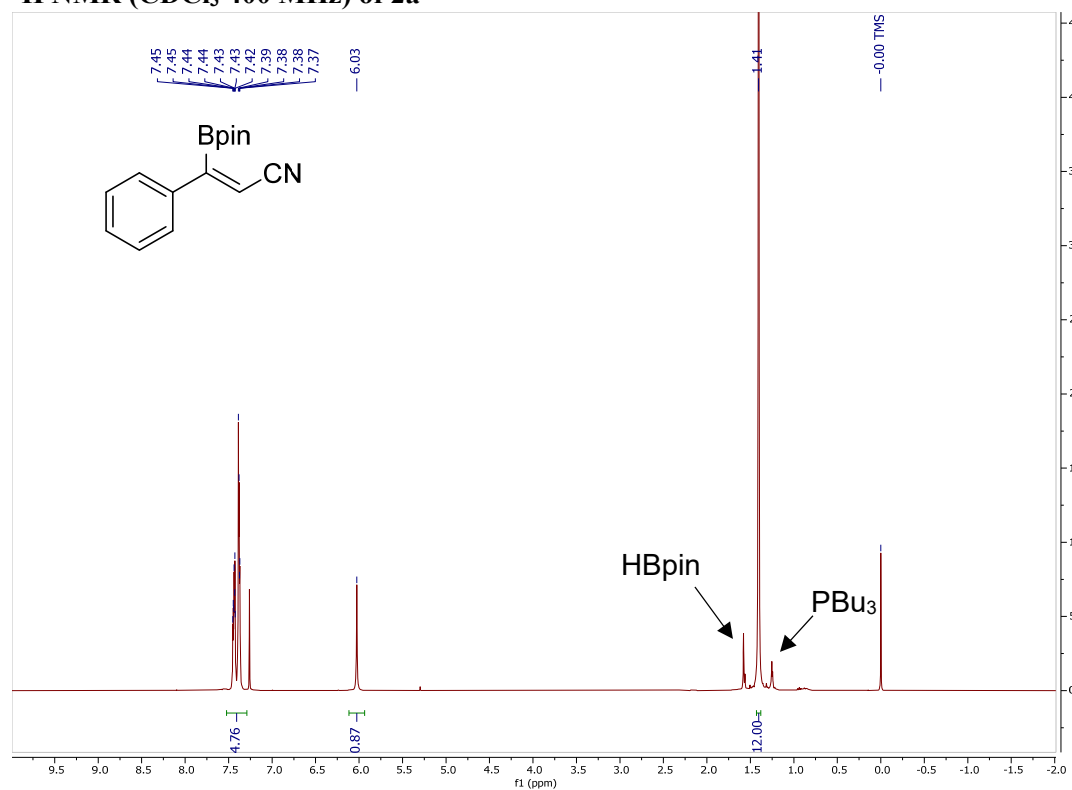



**$^{13}\text{C}$  NMR ( $\text{CDCl}_3$  100 MHz) of 2a**

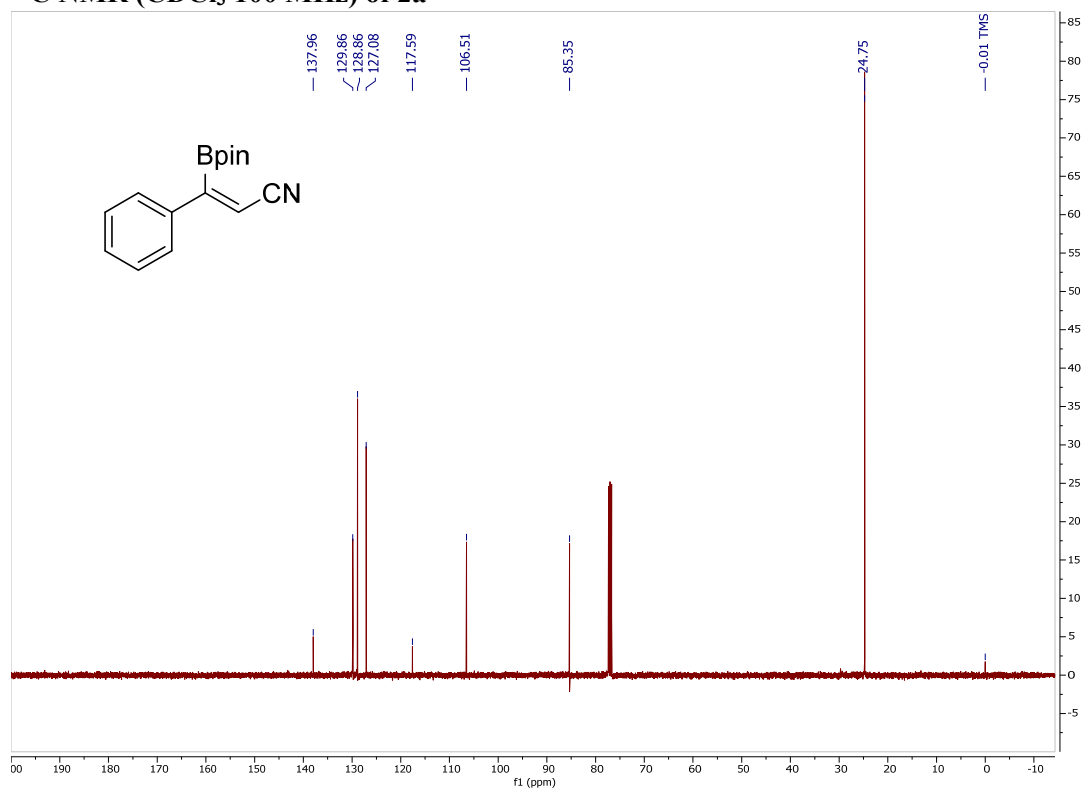

**19. NMR Spectra of 1,2-vinylcyanoborane Potassium Trifluoroborate Salts**  
 **$^1\text{H}$  NMR ( $\text{DMSO}-d_6$  400 MHz) of 3a**

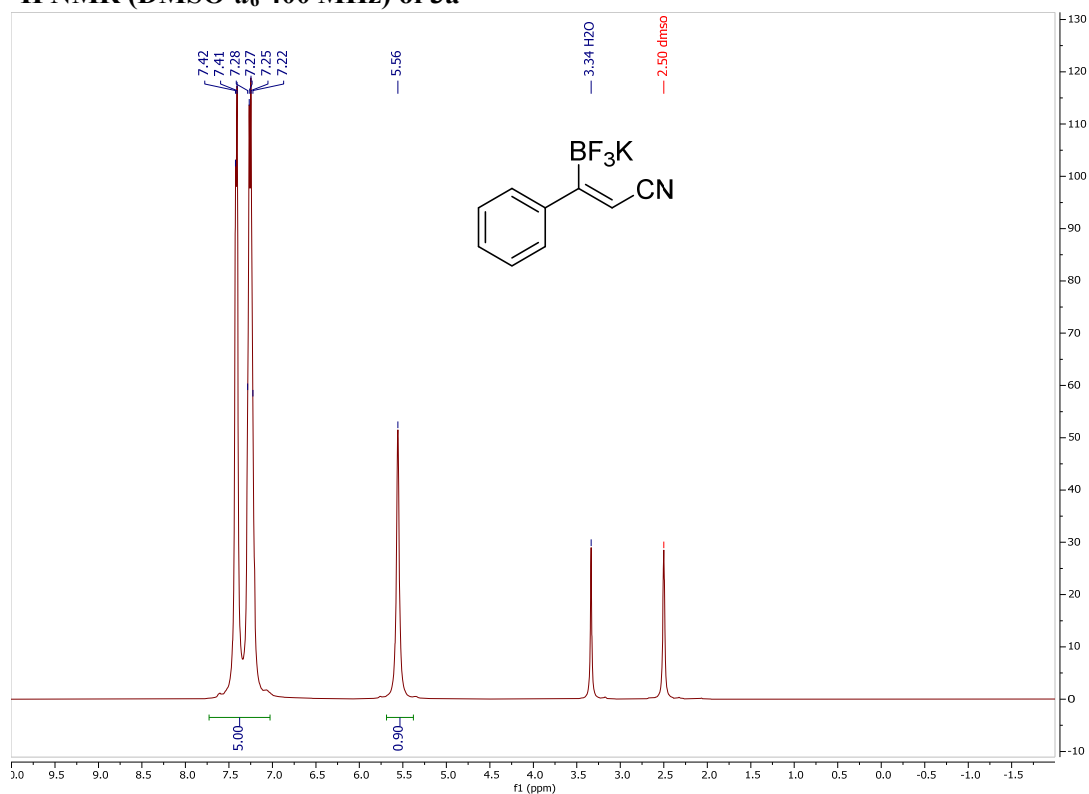

**$^{13}\text{C}$  NMR (DMSO- $d_6$  100 MHz) of 3a**

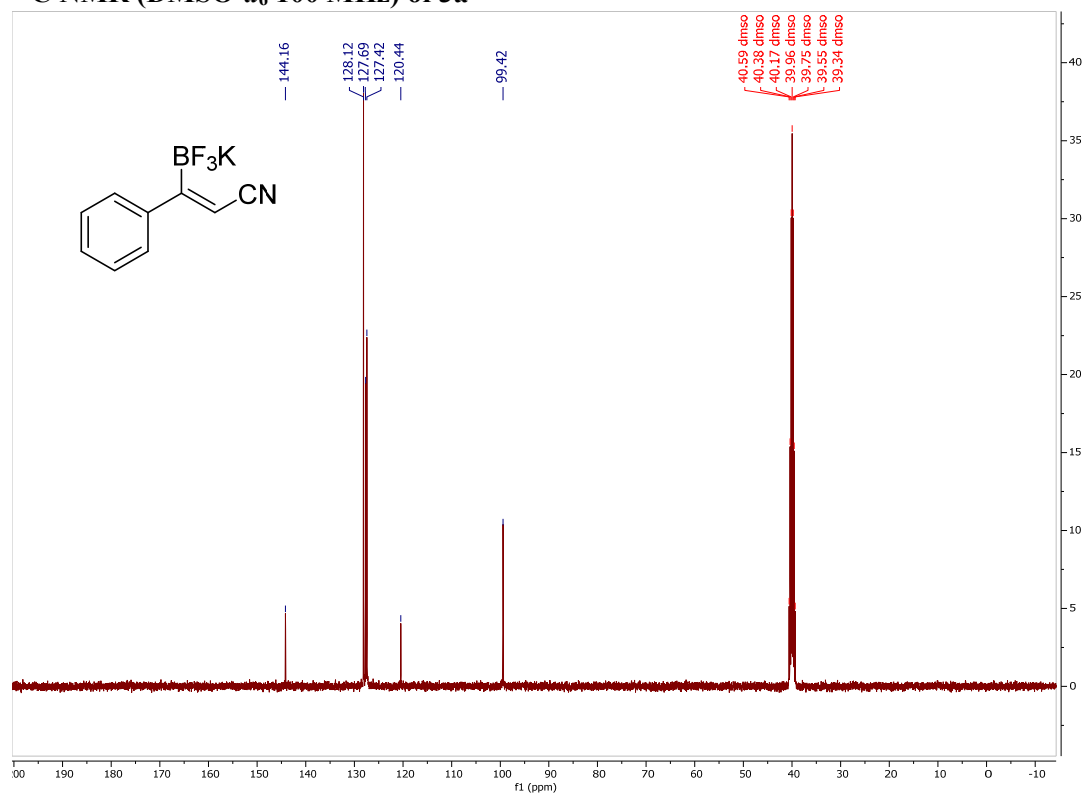

**$^{19}\text{F}$  NMR (DMSO- $d_6$  376 MHz) of 3a**

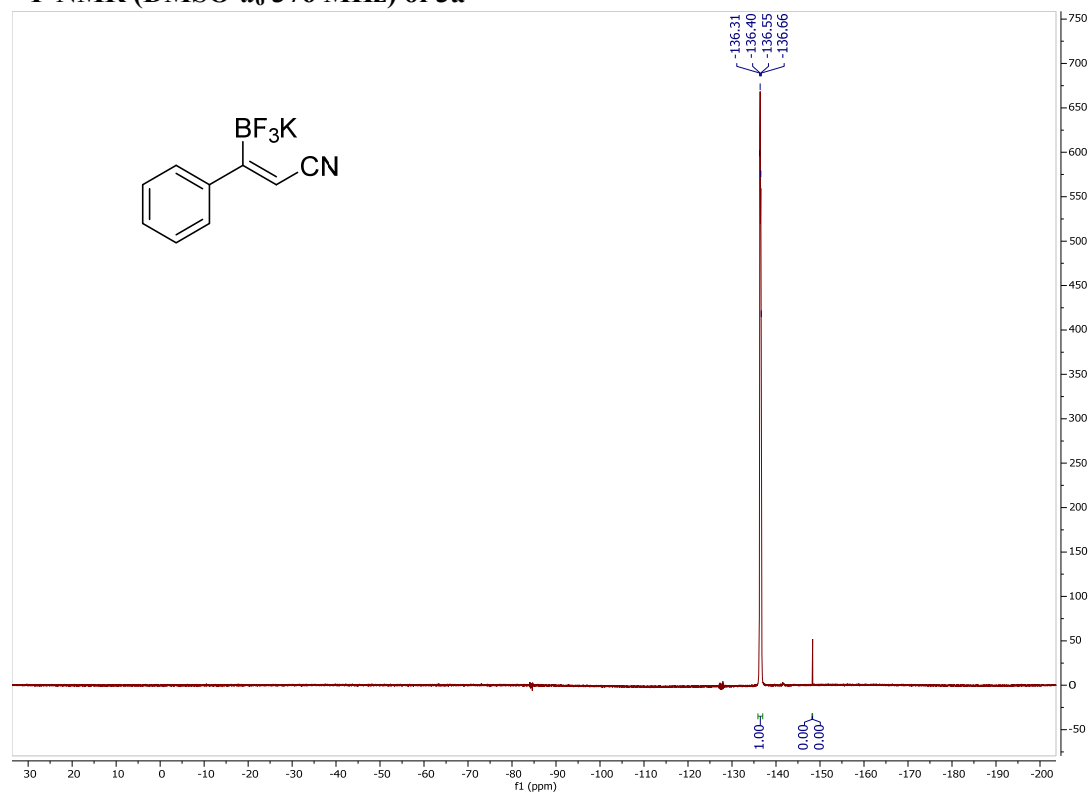

**<sup>11</sup>B NMR (DMSO-*d*<sub>6</sub> 128 MHz) of 3a**

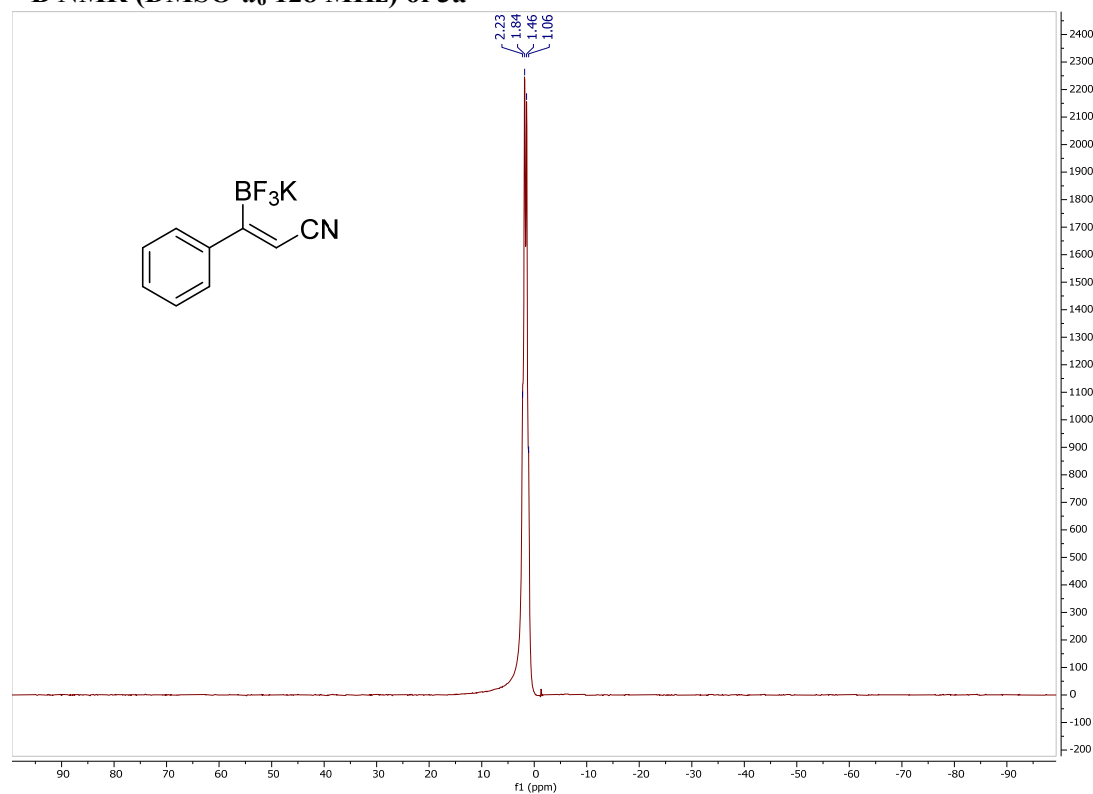

**<sup>1</sup>H NMR (CD<sub>3</sub>CN 400 MHz) of 3b**

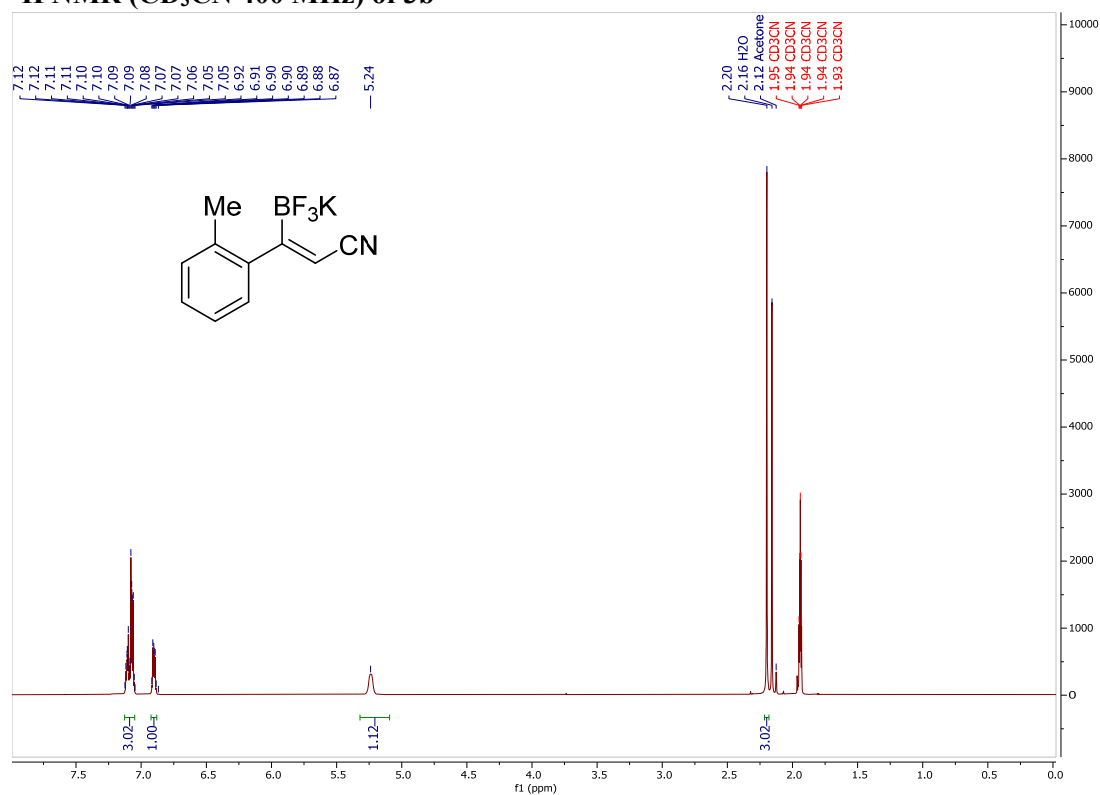

**$^{13}\text{C}$  NMR ( $\text{CD}_3\text{CN}$  100 MHz) of 3b**

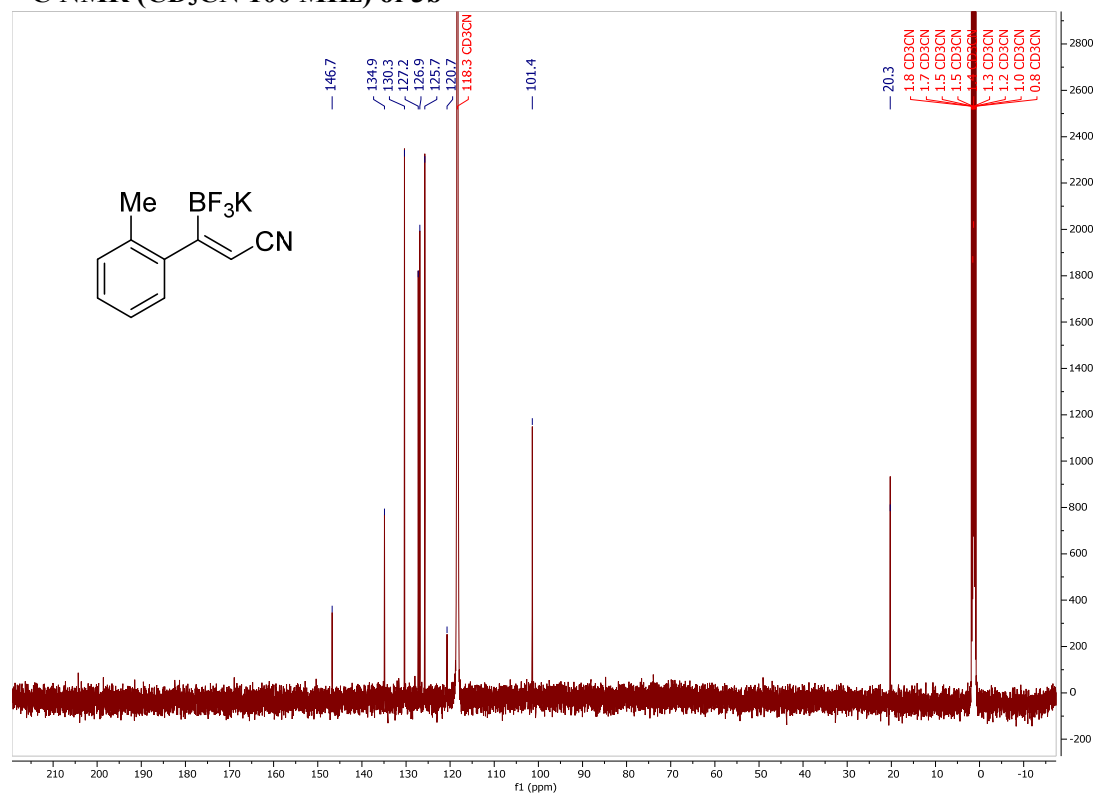

**$^{19}\text{F}$  NMR ( $\text{CD}_3\text{CN}$  376 MHz) of 3b**

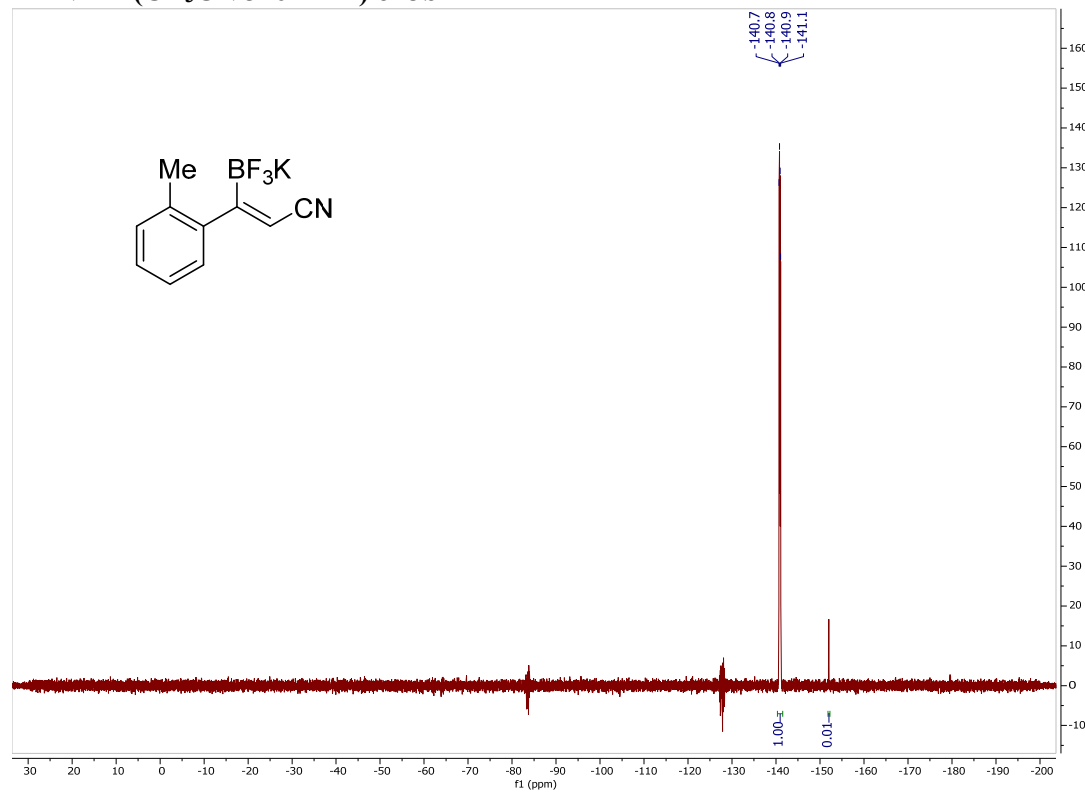

**$^{11}\text{B}$  NMR ( $\text{CD}_3\text{CN}$  128 MHz) of 3b**

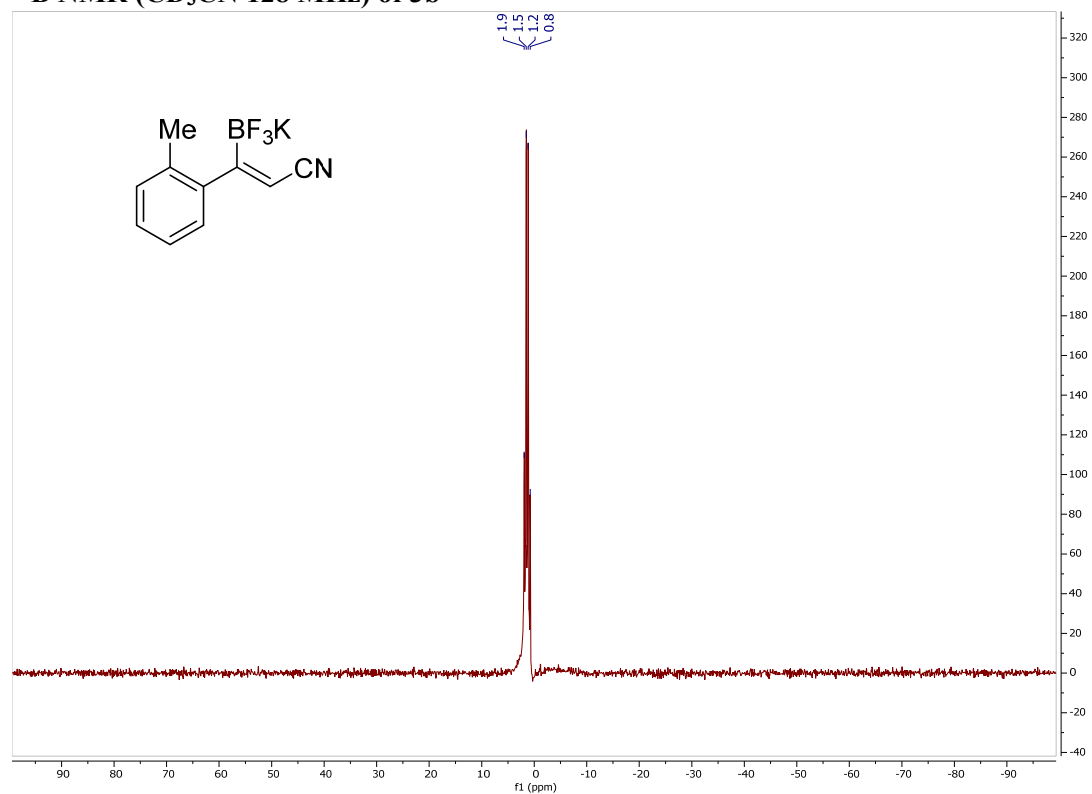

**$^1\text{H}$  NMR ( $\text{CD}_3\text{CN}$  400 MHz) of 3c**

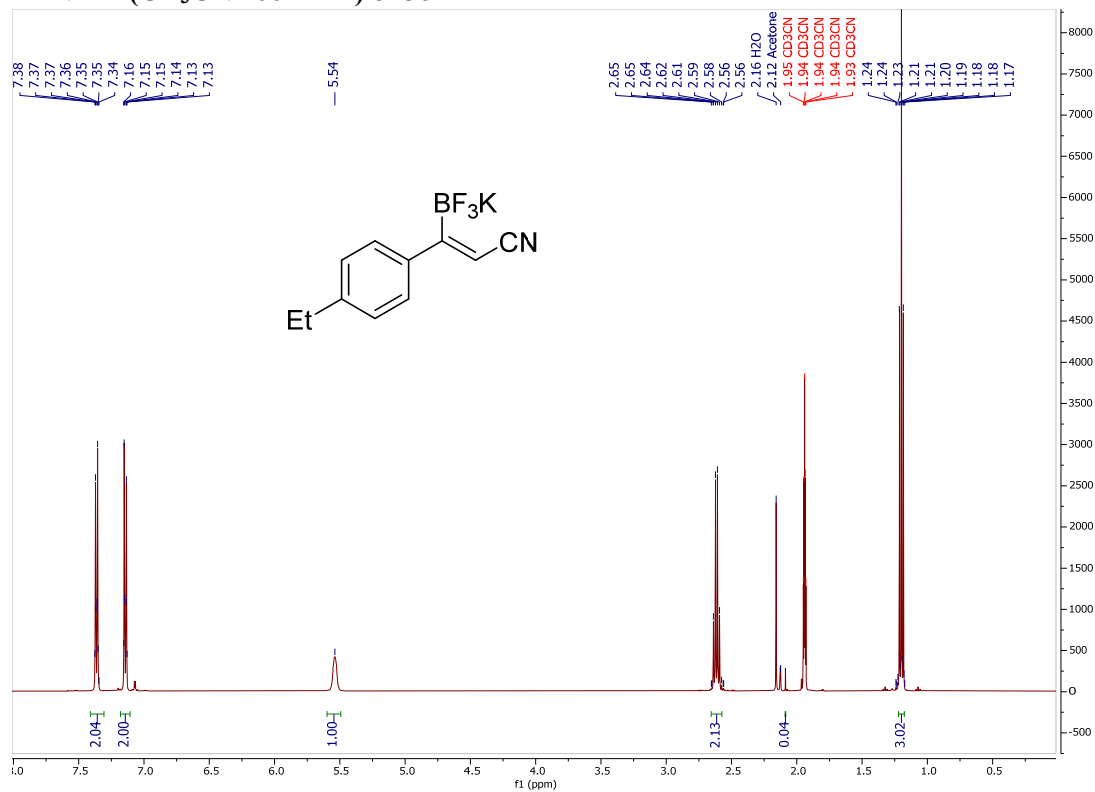

**$^{13}\text{C}$  NMR ( $\text{CD}_3\text{CN}$  100 MHz) of 3c**

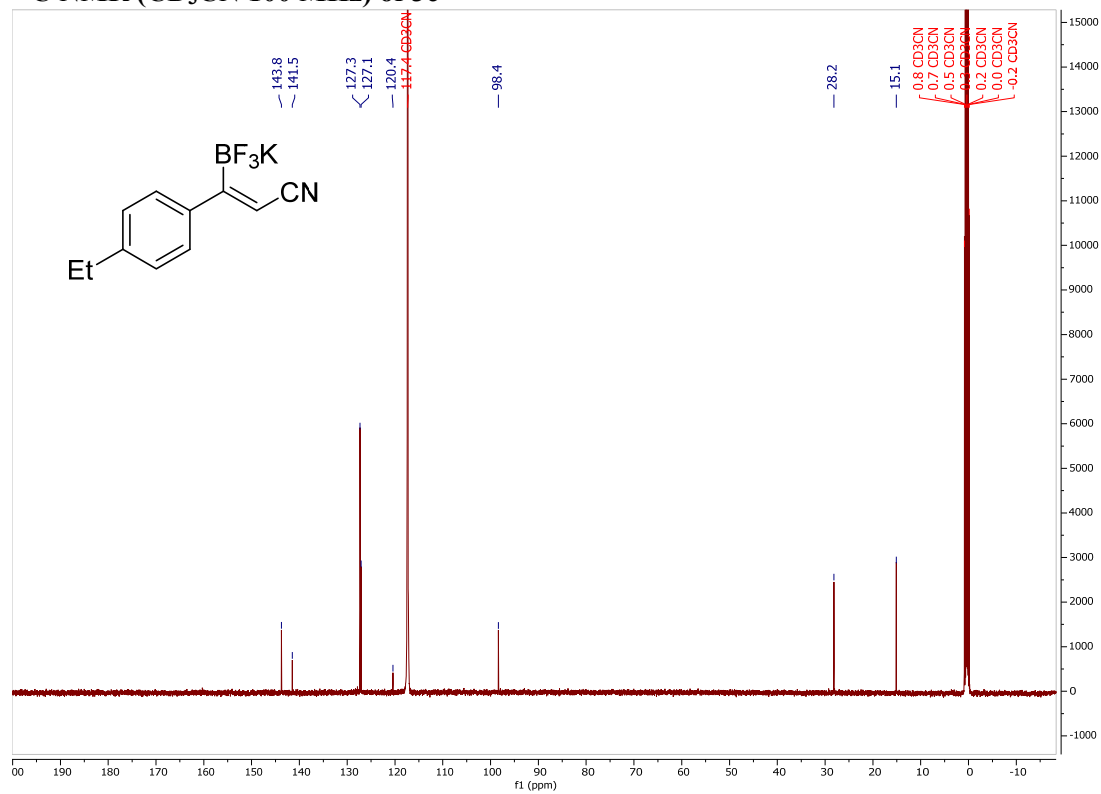

**$^{19}\text{F}$  NMR ( $\text{CD}_3\text{CN}$  376 MHz) of 3c**

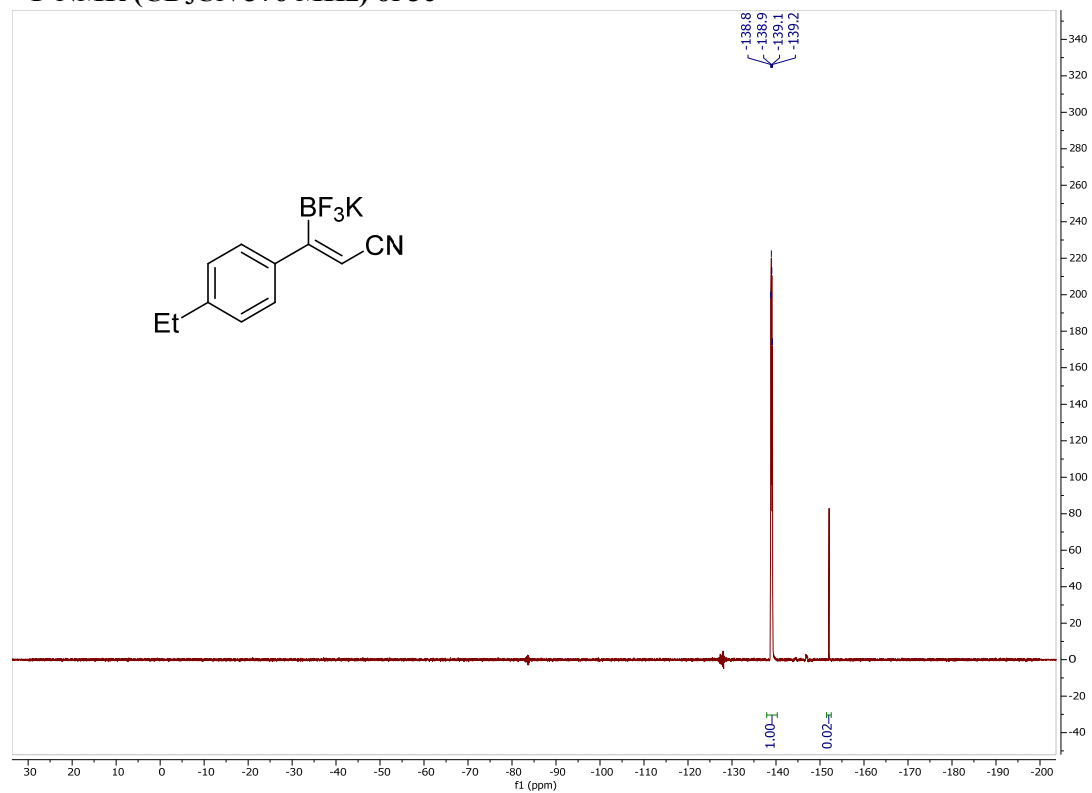

**$^{11}\text{B}$  NMR ( $\text{CD}_3\text{CN}$  128 MHz) of 3c**

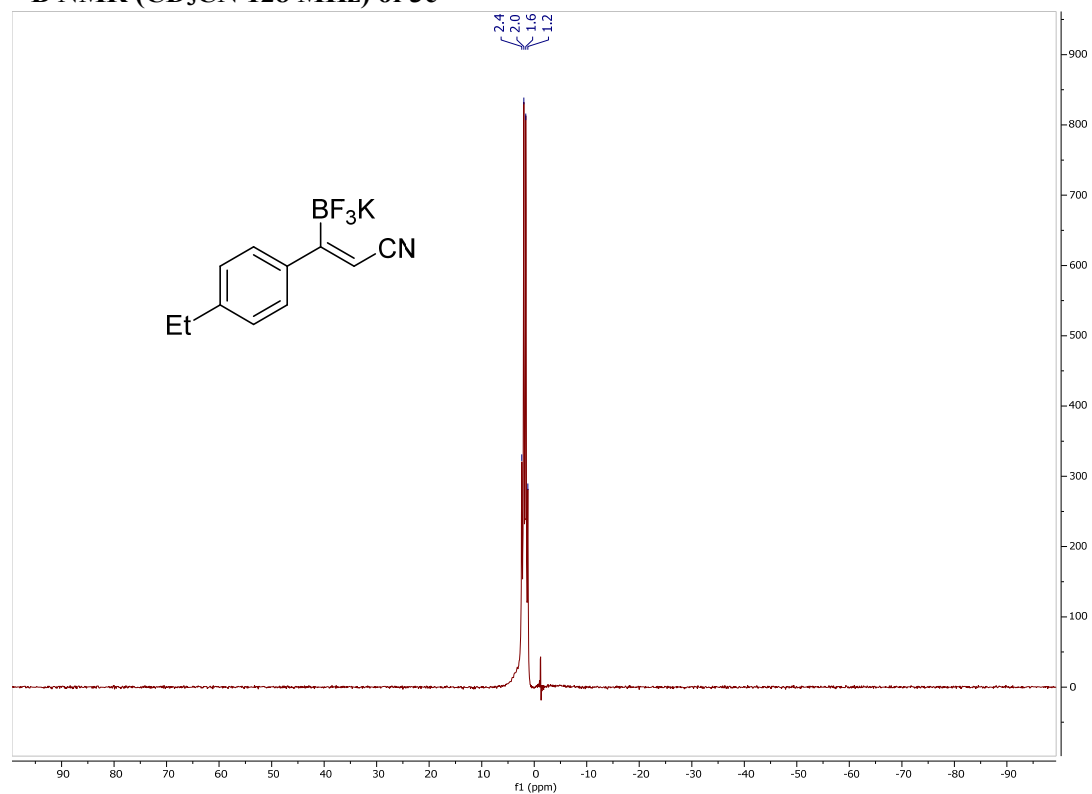

**$^1\text{H}$  NMR ( $\text{DMSO-}d_6$  400 MHz) of 3d**

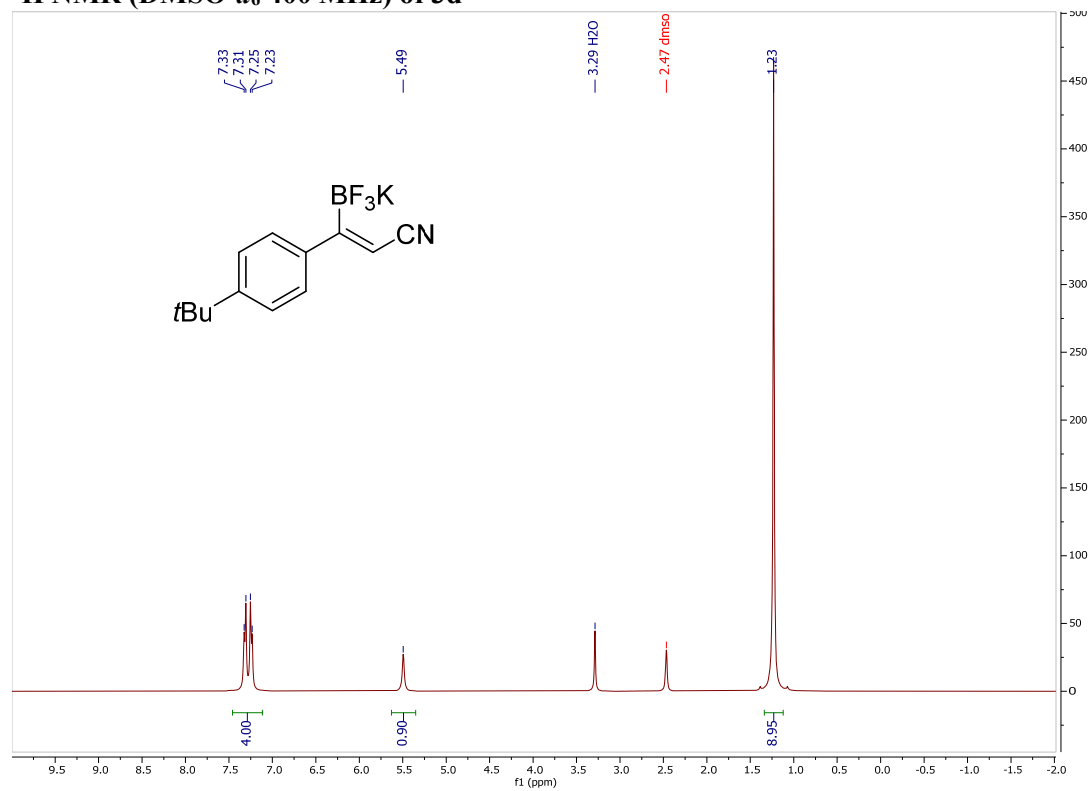

**$^{13}\text{C}$  NMR (DMSO- $d_6$  400 MHz) of 3d**

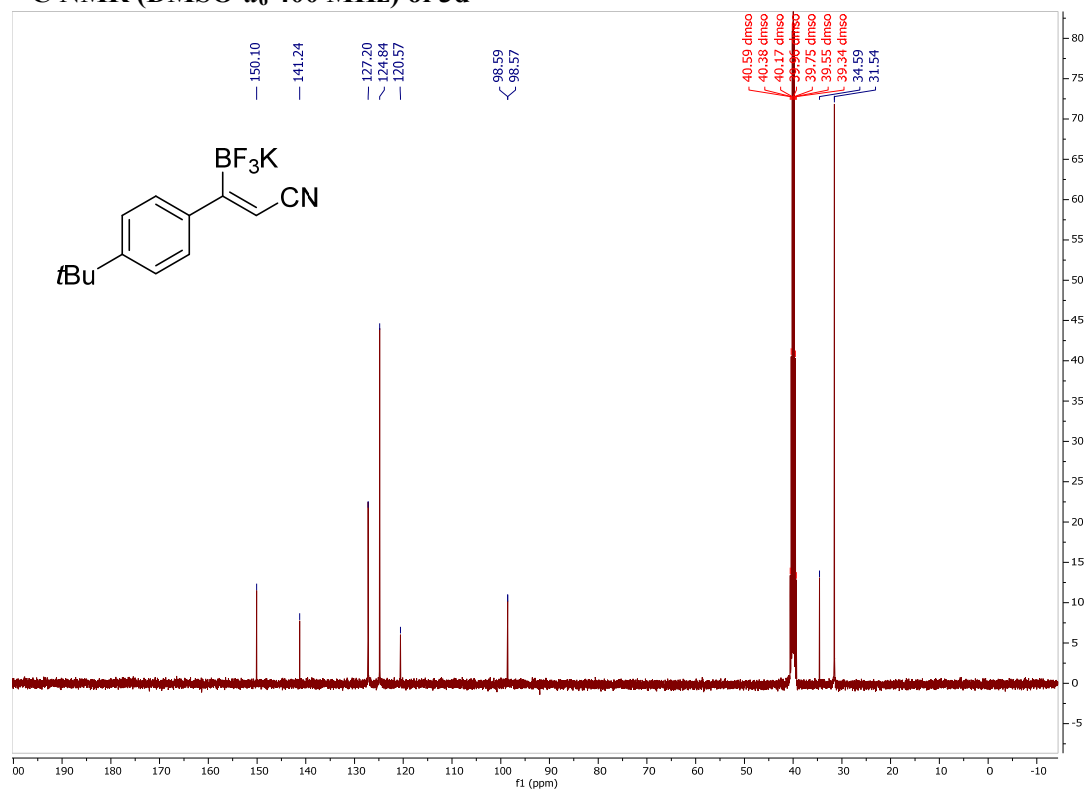

**$^{19}\text{F}$  NMR (DMSO- $d_6$  400 MHz) of 3d**

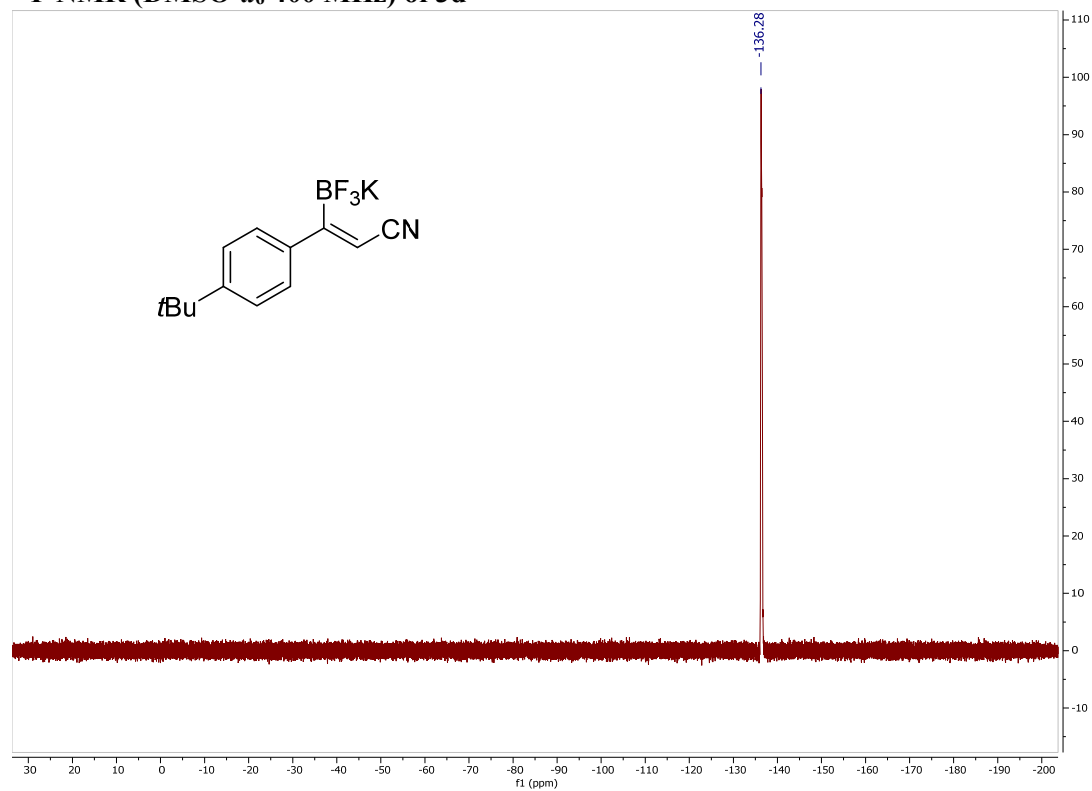



**$^{11}\text{B}$  NMR (DMSO- $d_6$  400 MHz) of 3d**

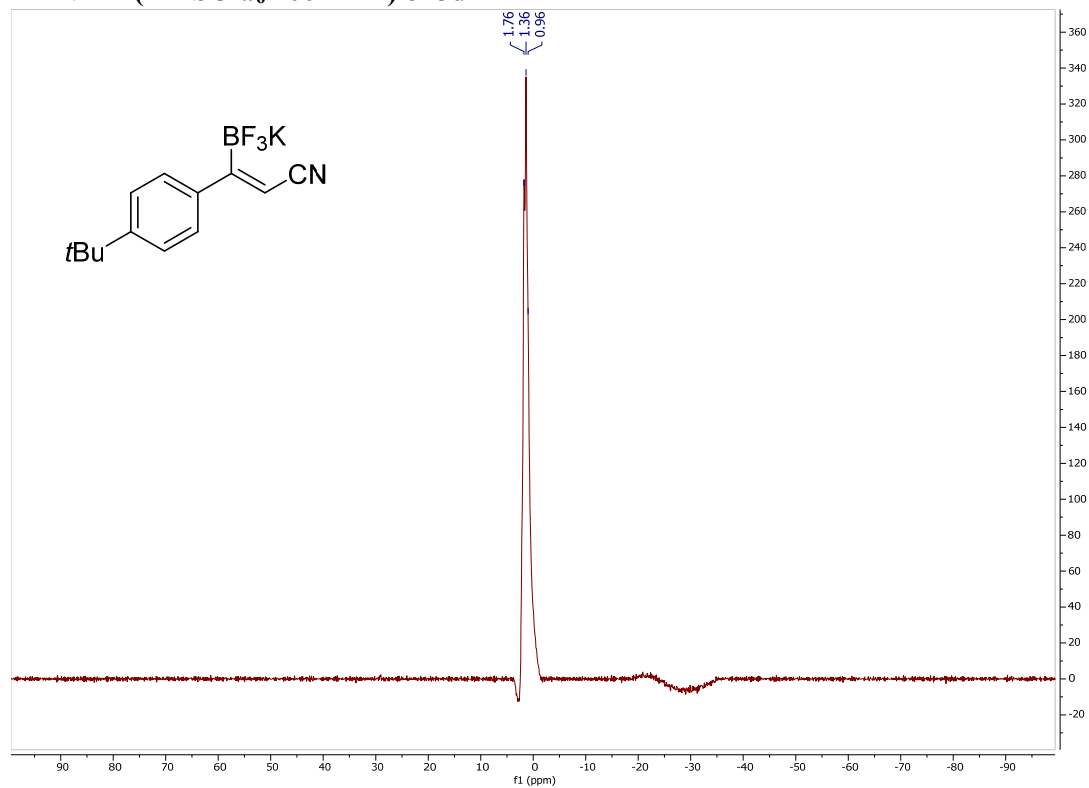

**$^1\text{H}$  NMR (DMSO- $d_6$  400 MHz) of 3e**

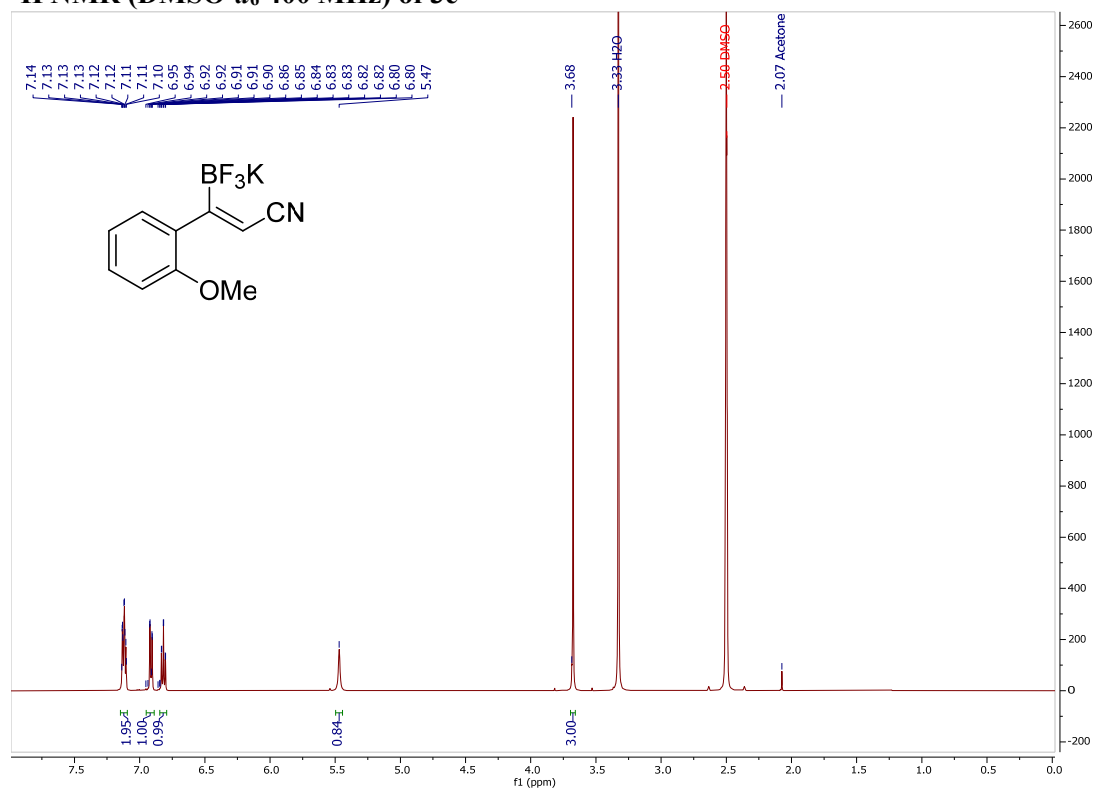

**<sup>13</sup>C NMR (DMSO-*d*<sub>6</sub> 100 MHz) of 3e**

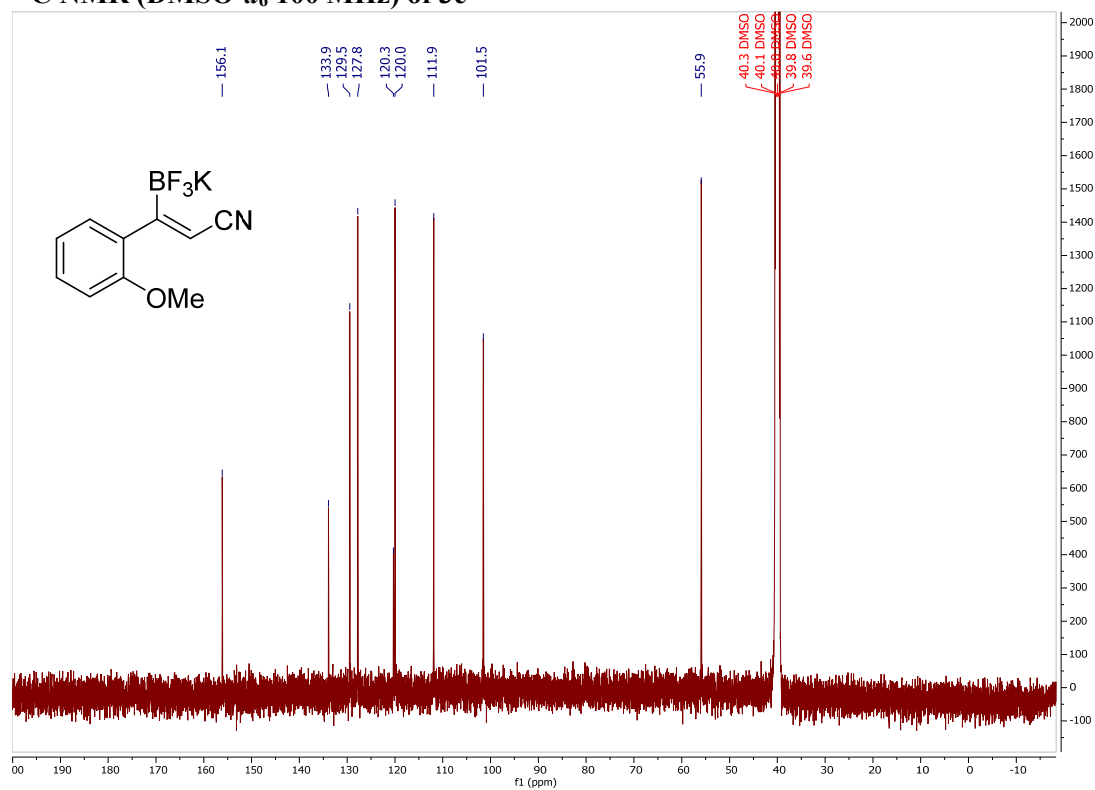

**<sup>19</sup>F NMR (DMSO-*d*<sub>6</sub> 376 MHz) of 3e**

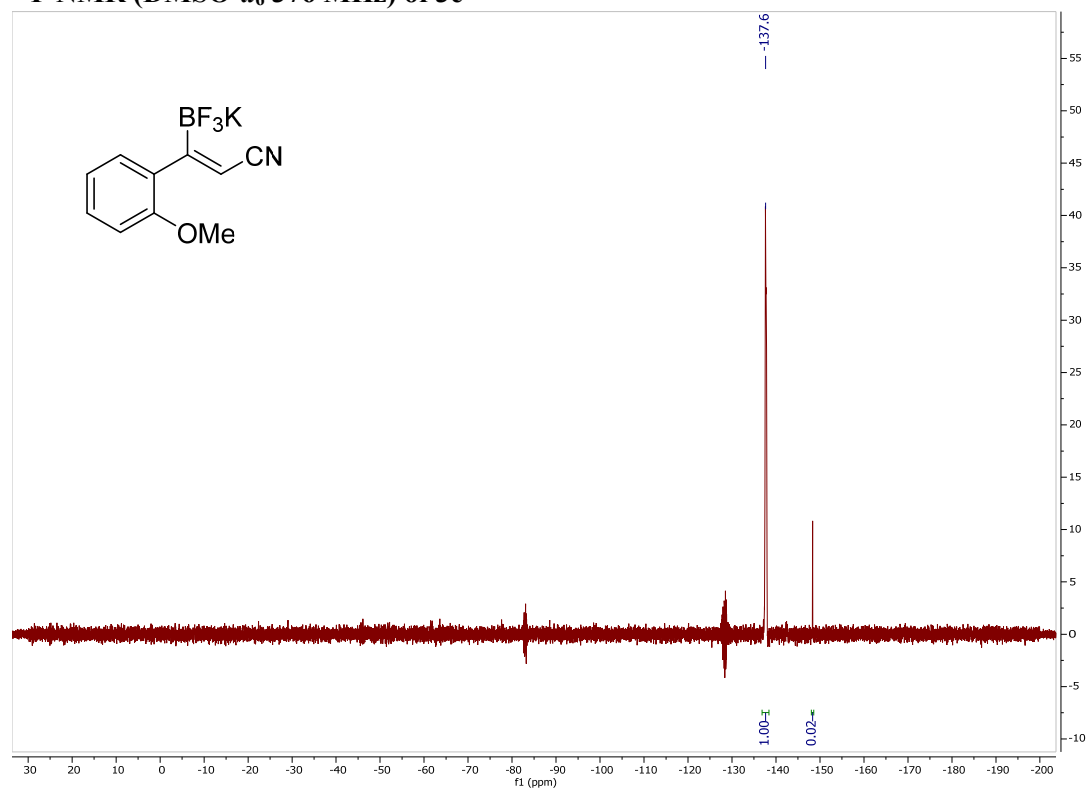

**<sup>11</sup>B NMR (DMSO-*d*<sub>6</sub> 128 MHz) of 3e**

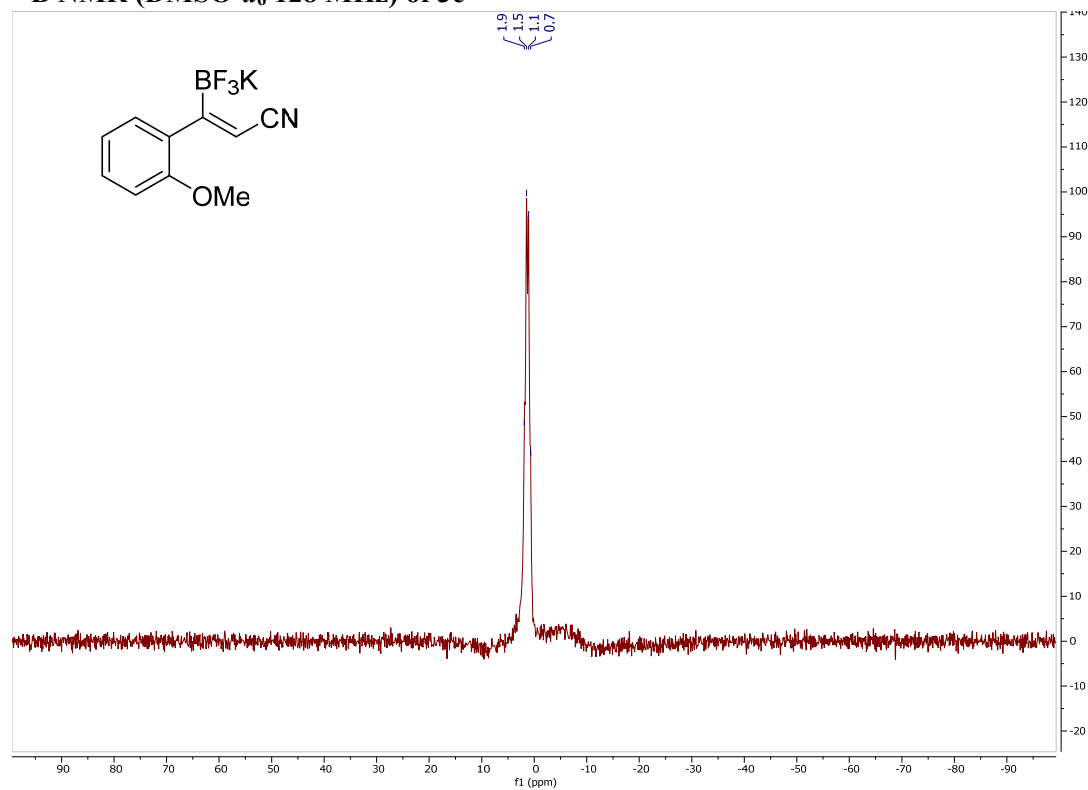

**<sup>1</sup>H NMR (CD<sub>3</sub>CN 400 MHz) of 3f**

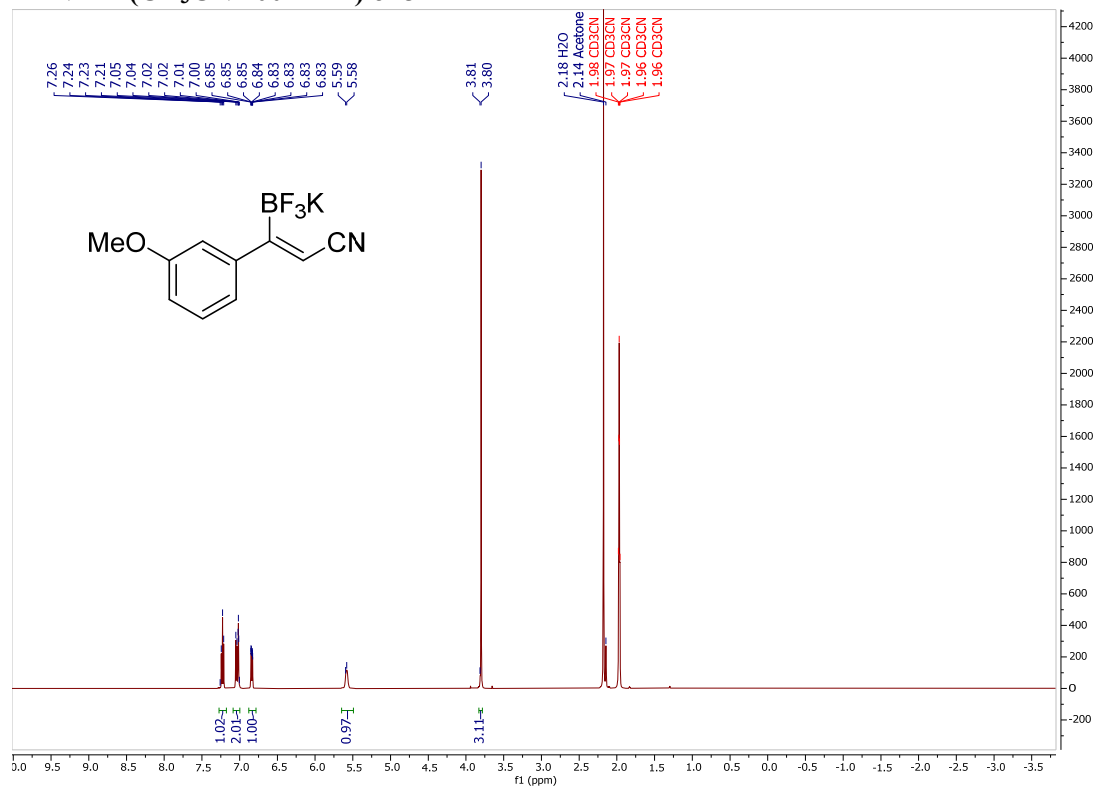

**$^{13}\text{C}$  NMR ( $\text{CD}_3\text{CN}$  100 MHz) of 3f**

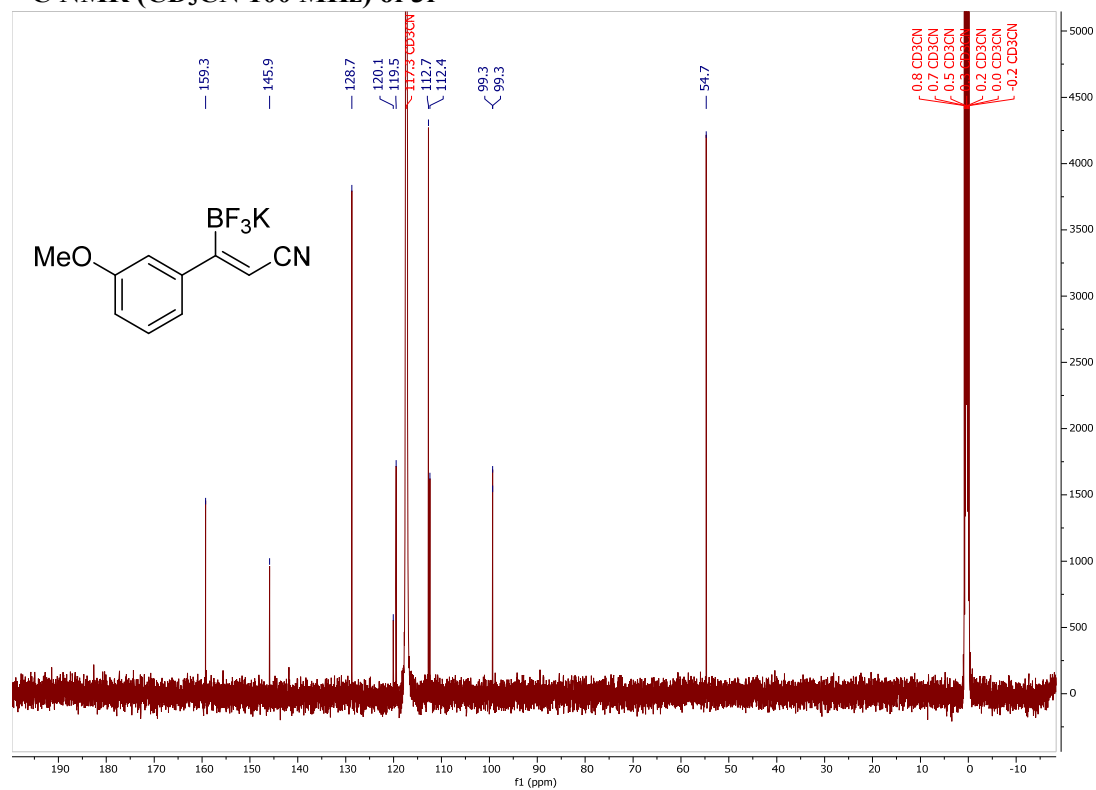

**$^{19}\text{F}$  NMR ( $\text{CD}_3\text{CN}$  376 MHz) of 3f**

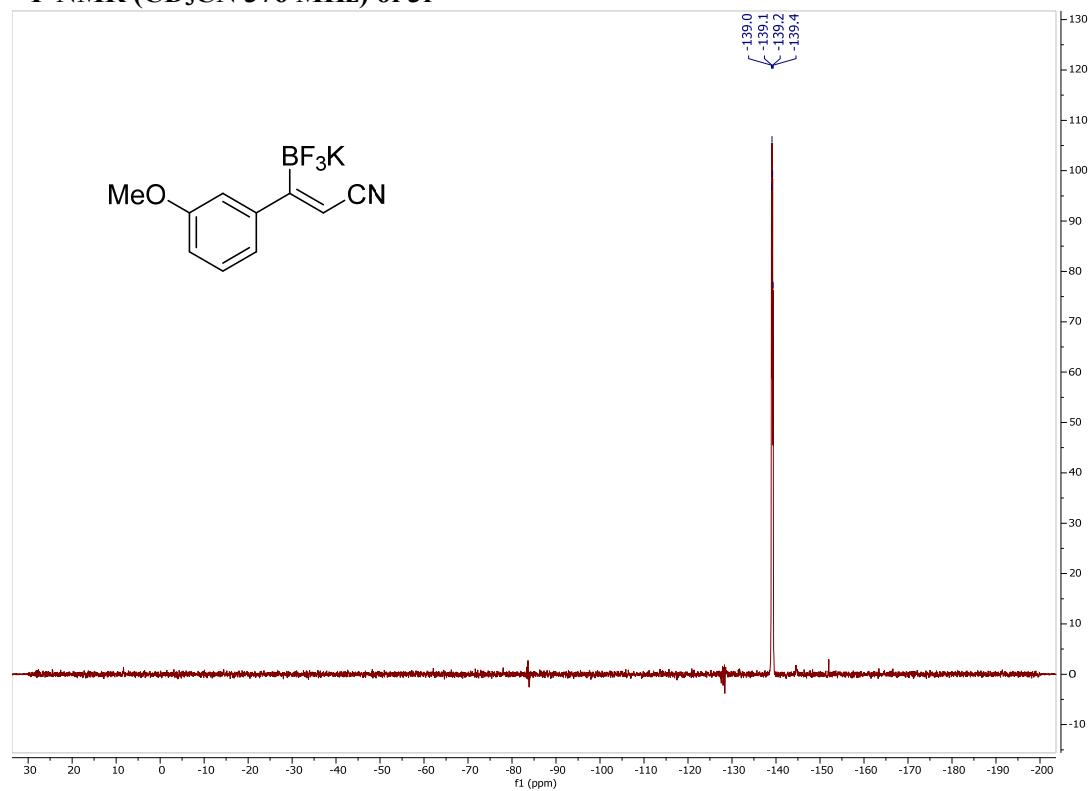

**$^{11}\text{B}$  NMR ( $\text{CD}_3\text{CN}$  128 MHz) of 3f**

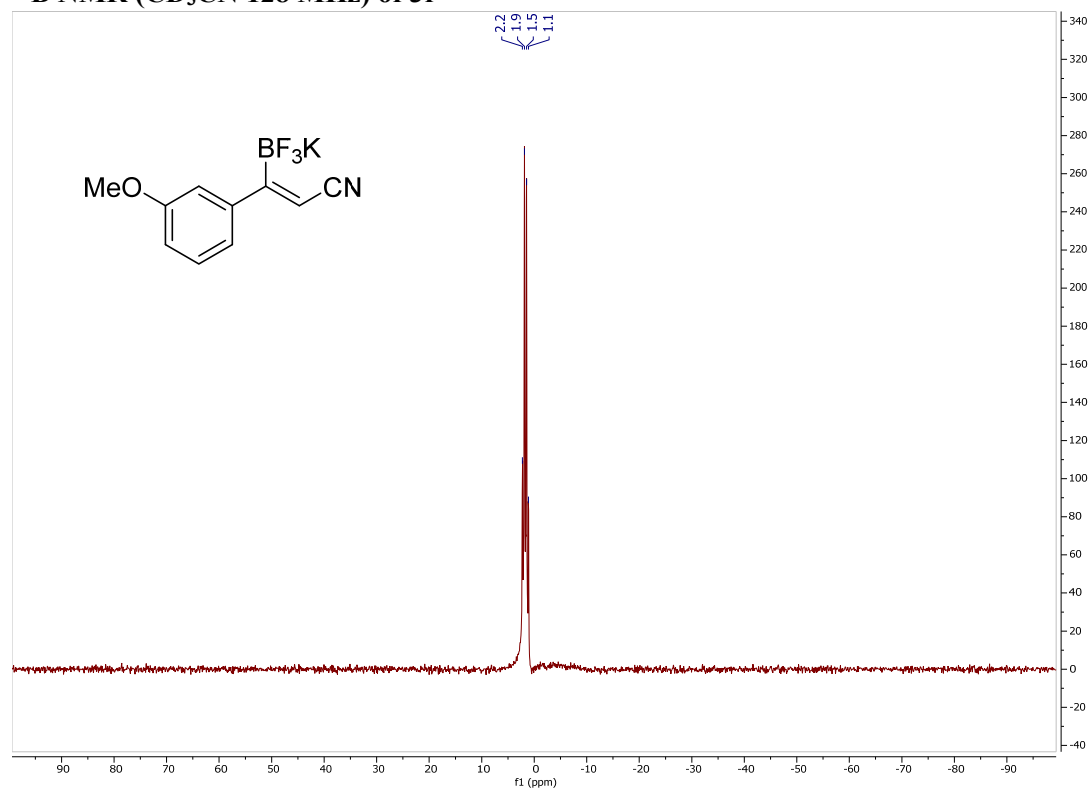

**$^1\text{H}$  NMR ( $\text{CD}_3\text{CN}$  400 MHz) of 3g**

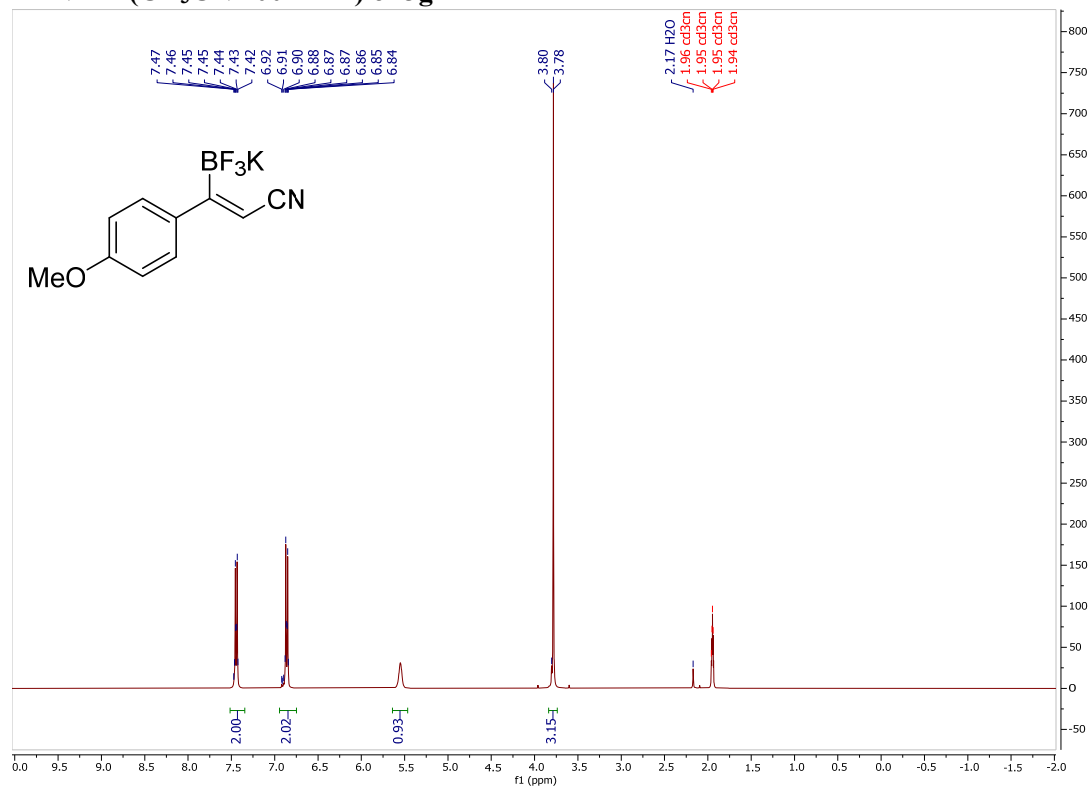

**$^{13}\text{C}$  NMR ( $\text{CD}_3\text{CN}$  100 MHz) of 3g**

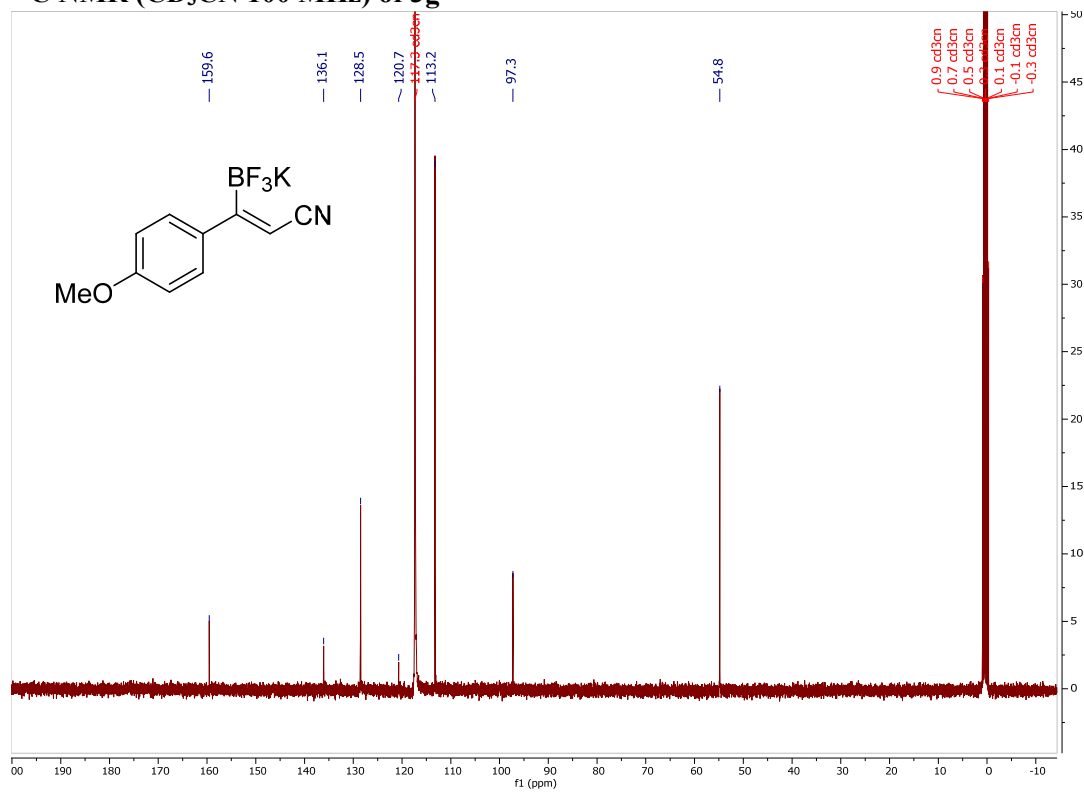

**$^{19}\text{F}$  NMR ( $\text{CD}_3\text{CN}$  376 MHz) of 3g**

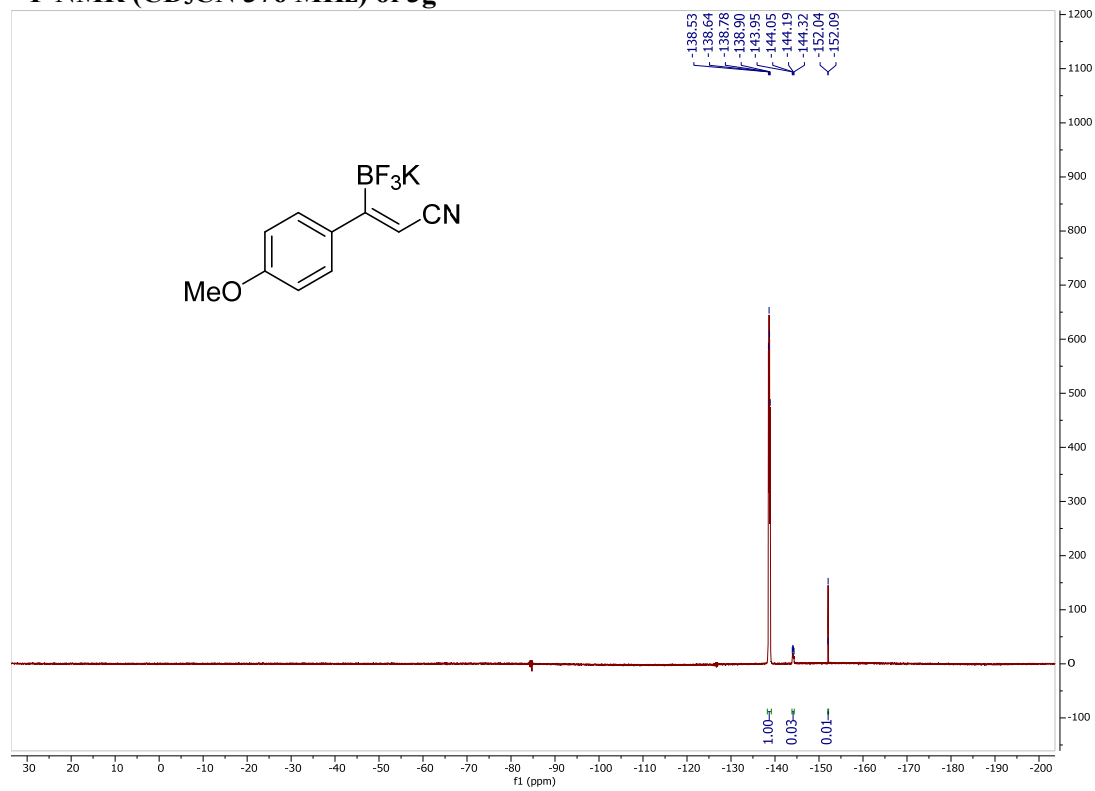

**$^{11}\text{B}$  NMR ( $\text{CD}_3\text{CN}$  128 MHz) of 3g**

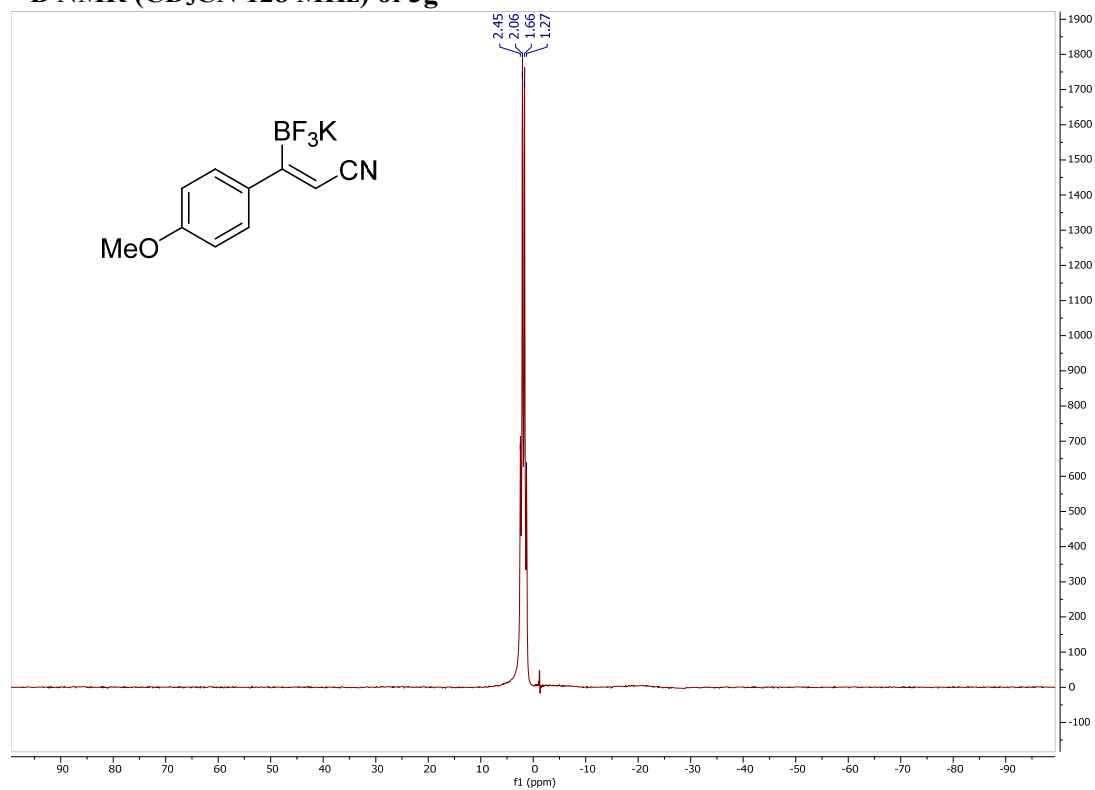

**$^1\text{H}$  NMR ( $\text{CD}_3\text{CN}$  400 MHz) of 3h**

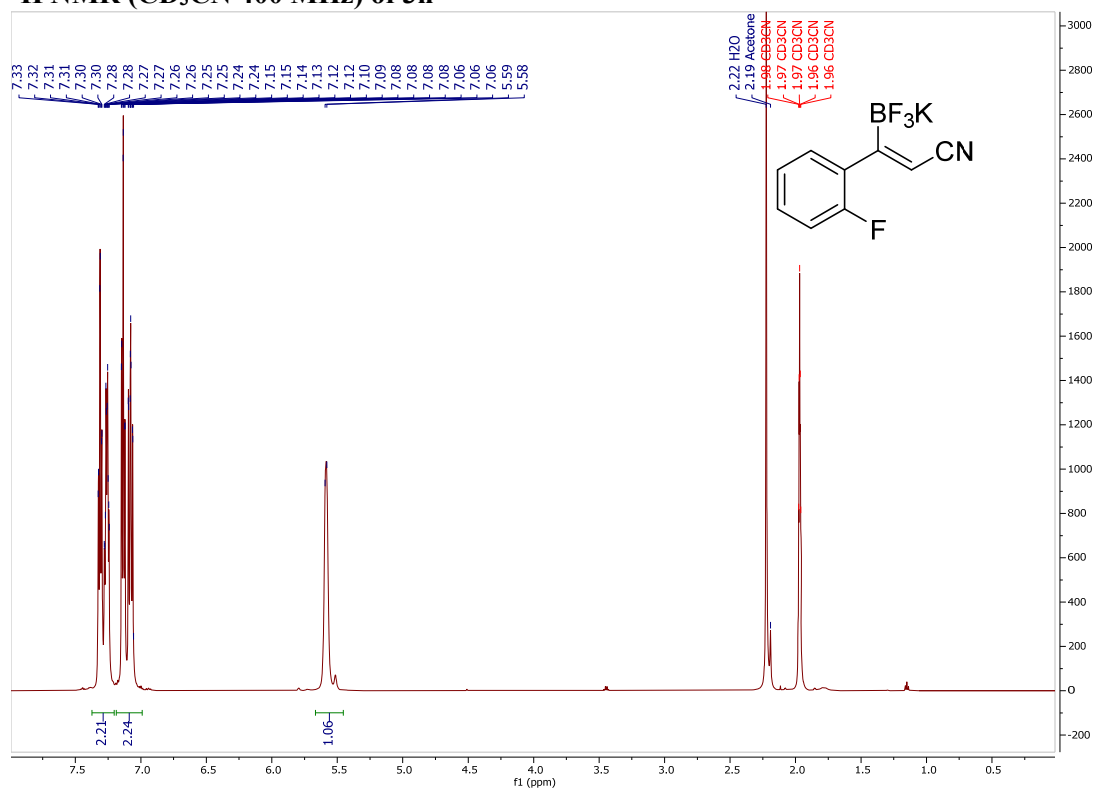

**<sup>13</sup>C NMR (CD<sub>3</sub>CN 100 MHz) of 3h**

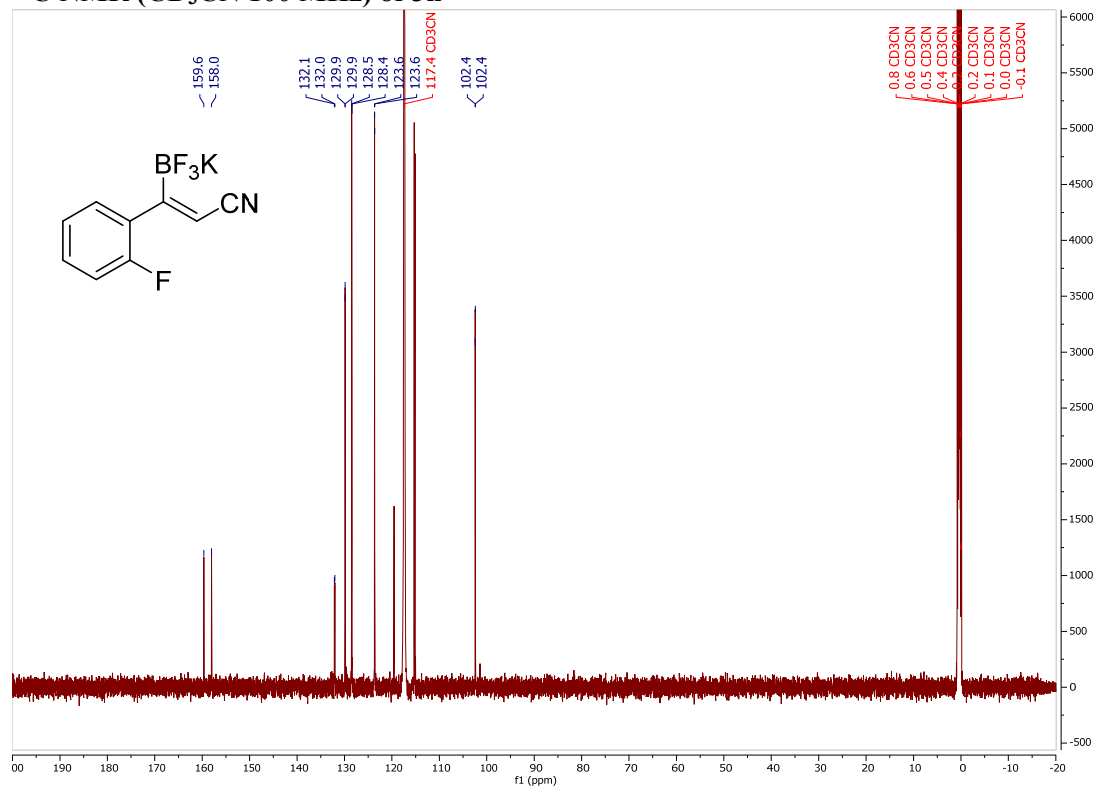

**<sup>19</sup>F NMR (CD<sub>3</sub>CN 376 MHz) of 3h**

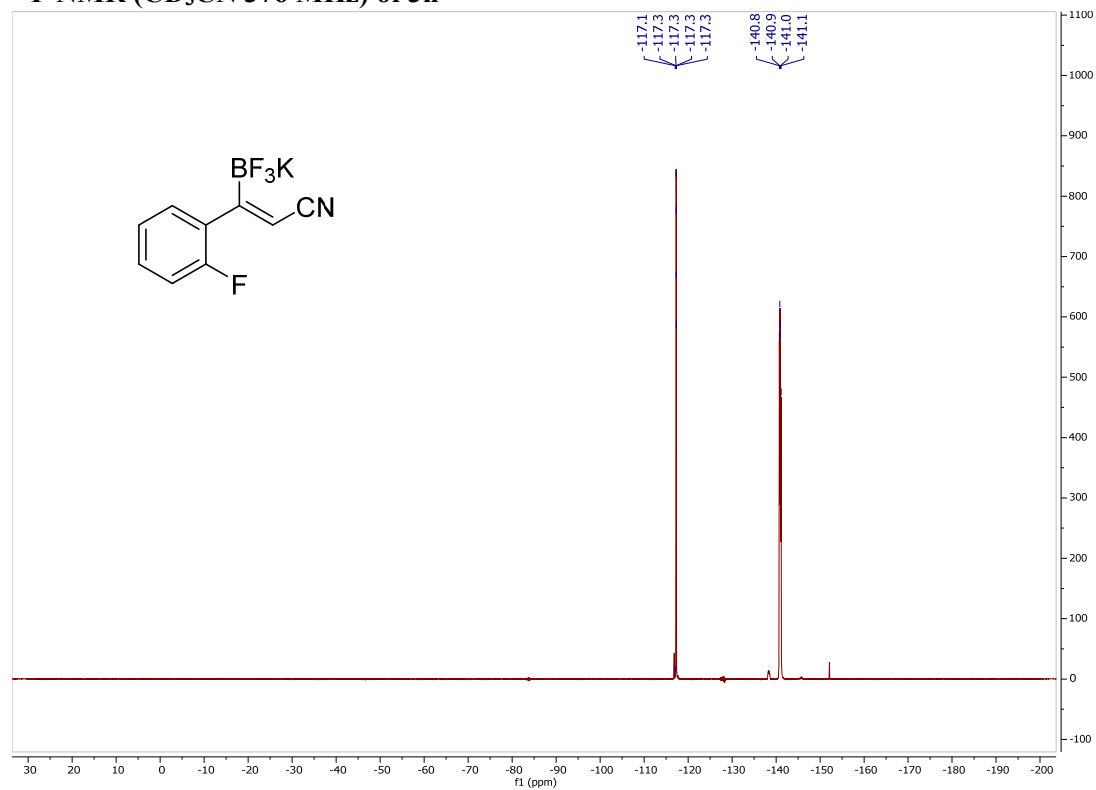



**$^{11}\text{B}$  NMR ( $\text{CD}_3\text{CN}$  128 MHz) of 3h**

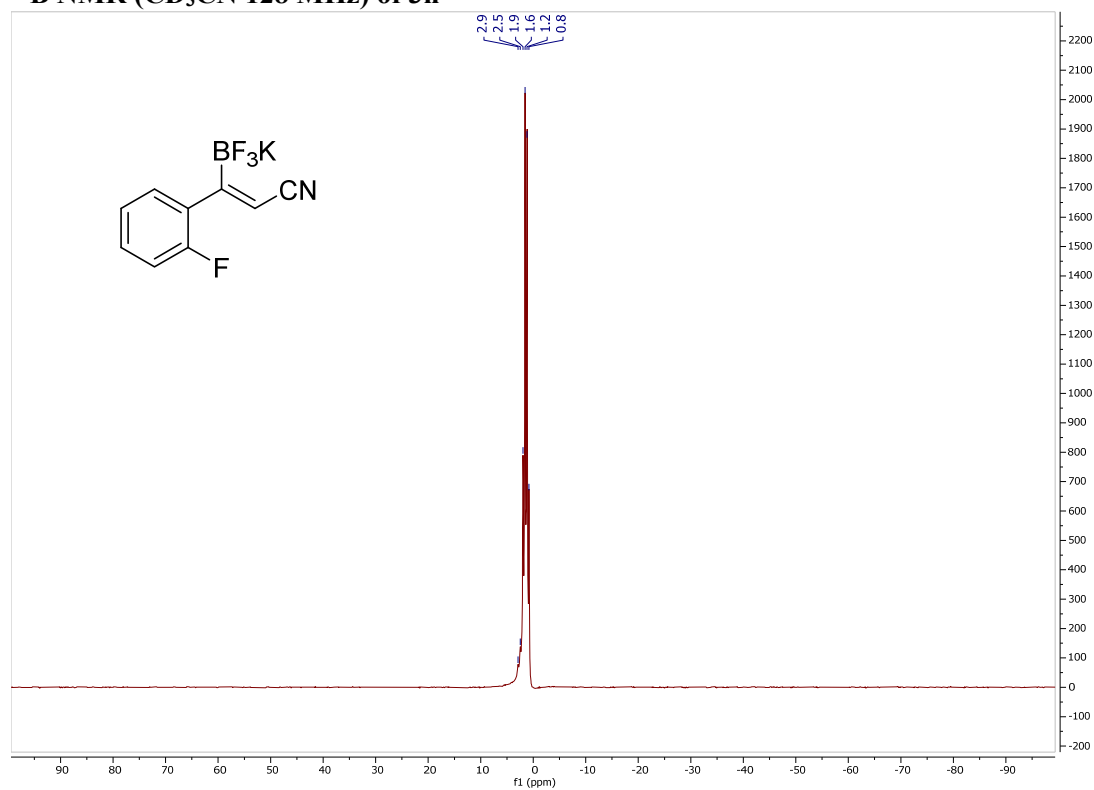

**$^1\text{H}$  NMR ( $\text{CD}_3\text{CN}$  400 MHz) of 3i**

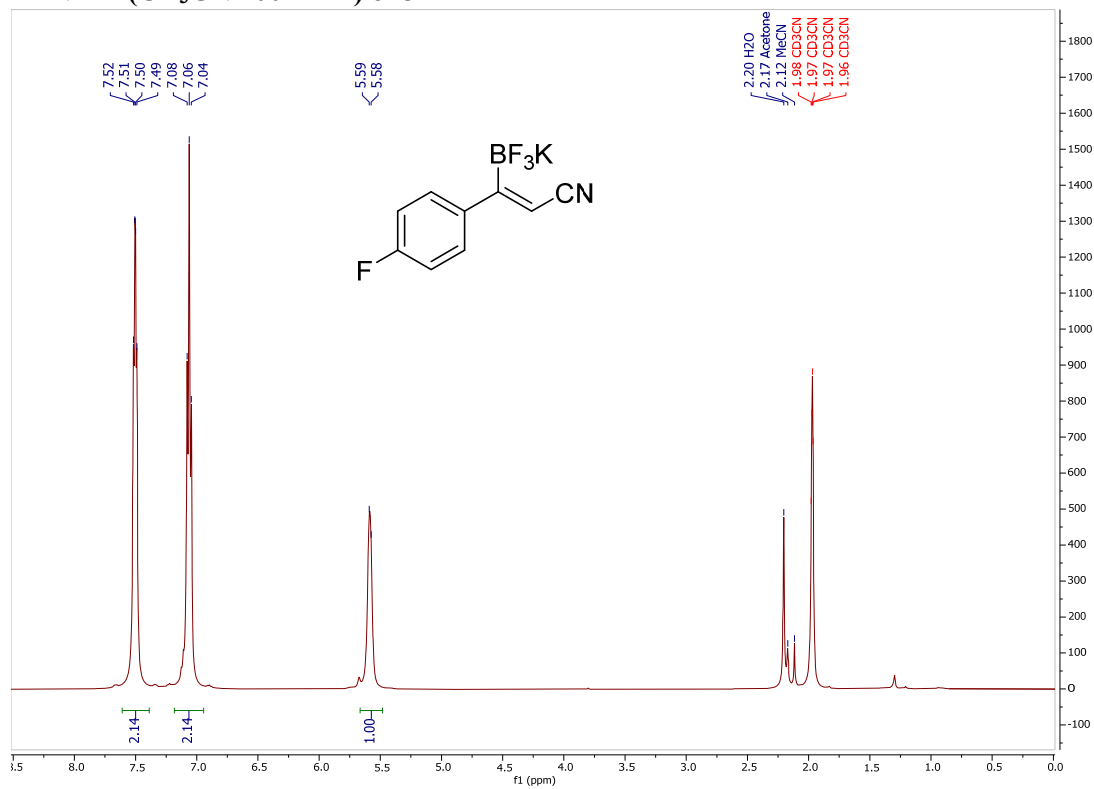

**<sup>13</sup>C NMR (CD<sub>3</sub>CN 100 MHz) of 3i**

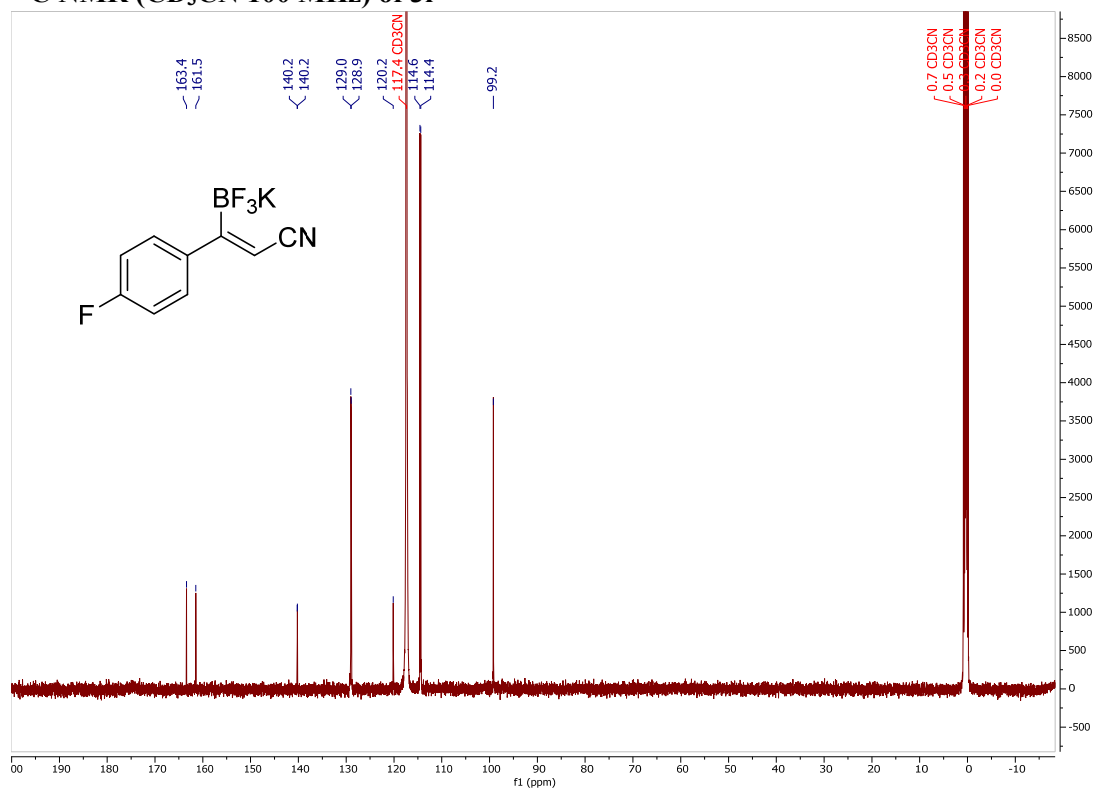

**<sup>19</sup>F NMR (CD<sub>3</sub>CN 376 MHz) of 3i**

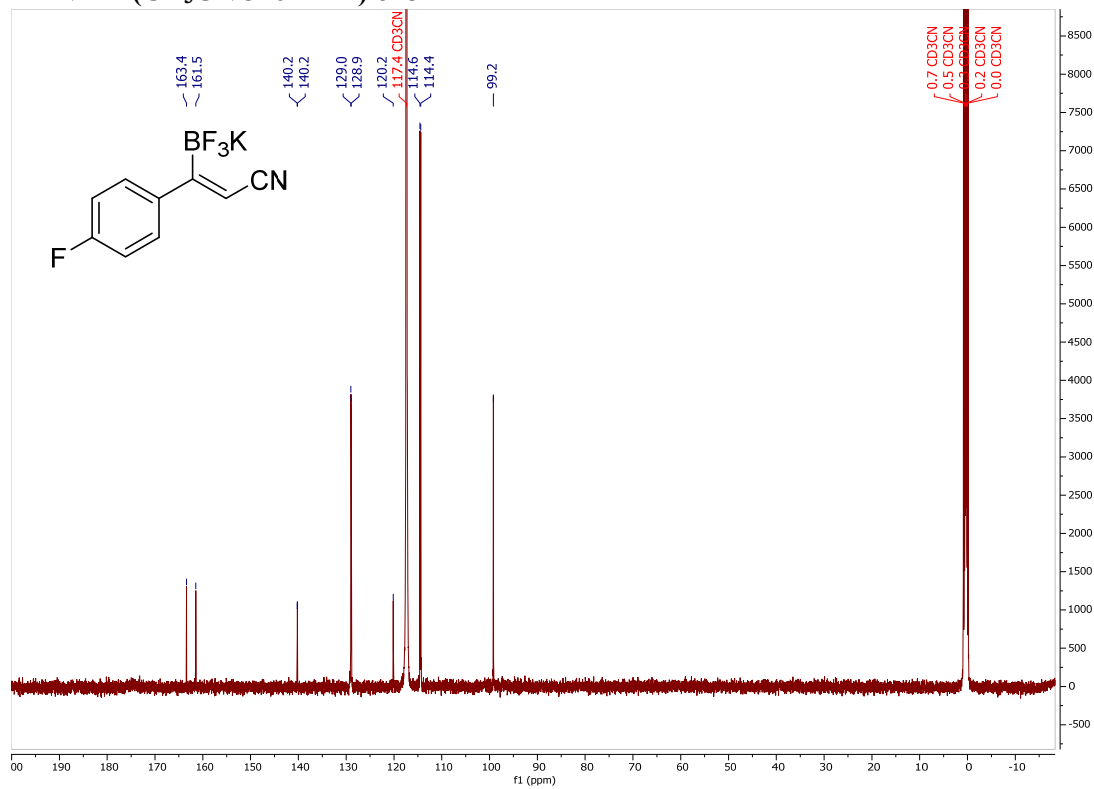

**$^{11}\text{B}$  NMR ( $\text{CD}_3\text{CN}$  128 MHz) of 3i**

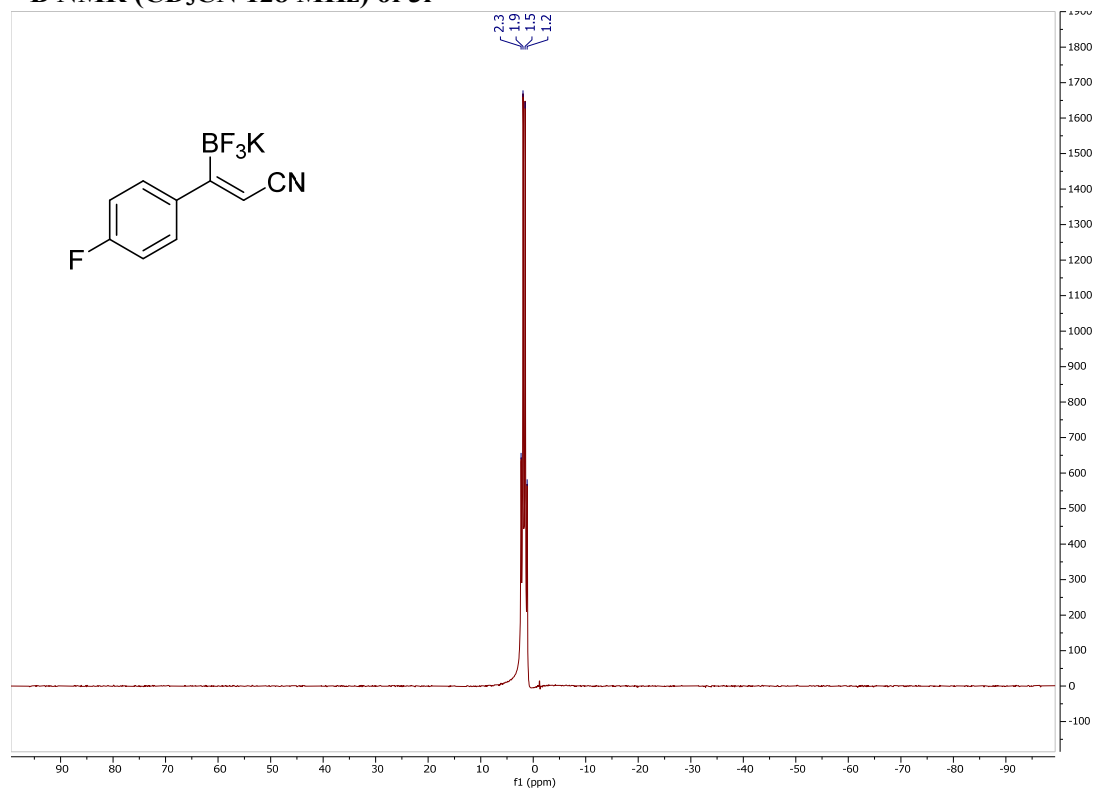

**$^1\text{H}$  NMR ( $\text{CD}_3\text{CN}$  400 MHz) of 3k**

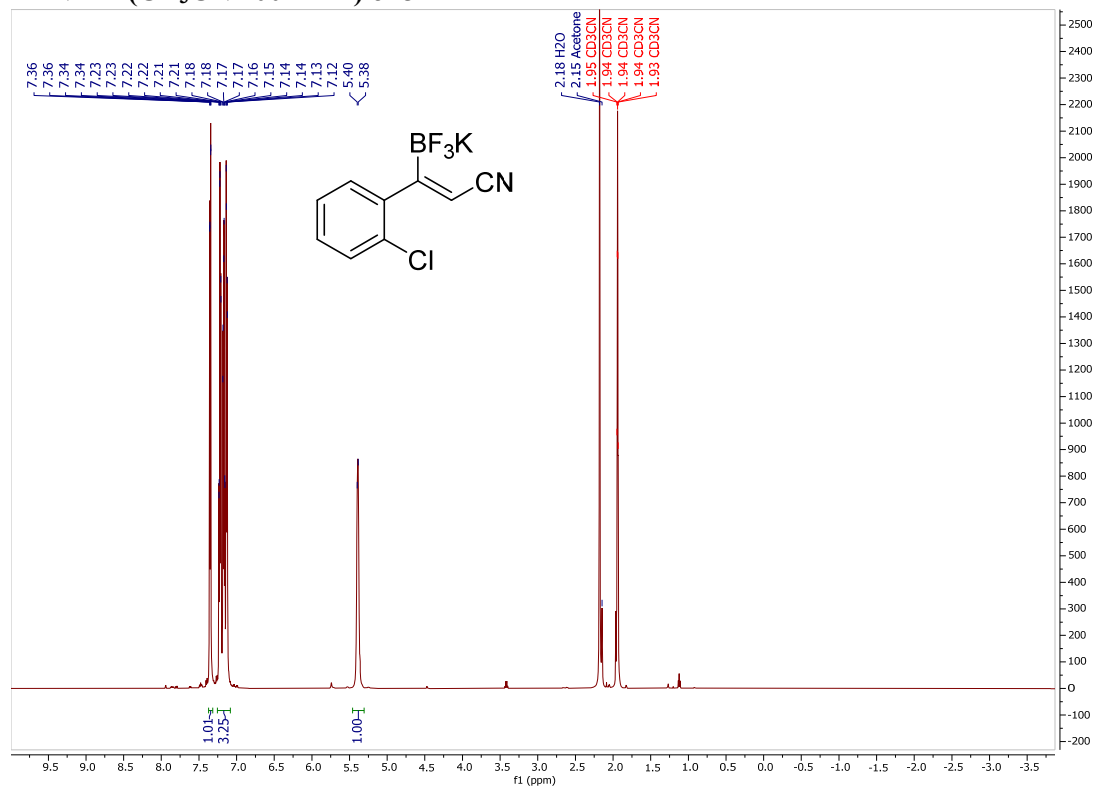

**$^{13}\text{C}$  NMR ( $\text{CD}_3\text{CN}$  100 MHz) of 3j**

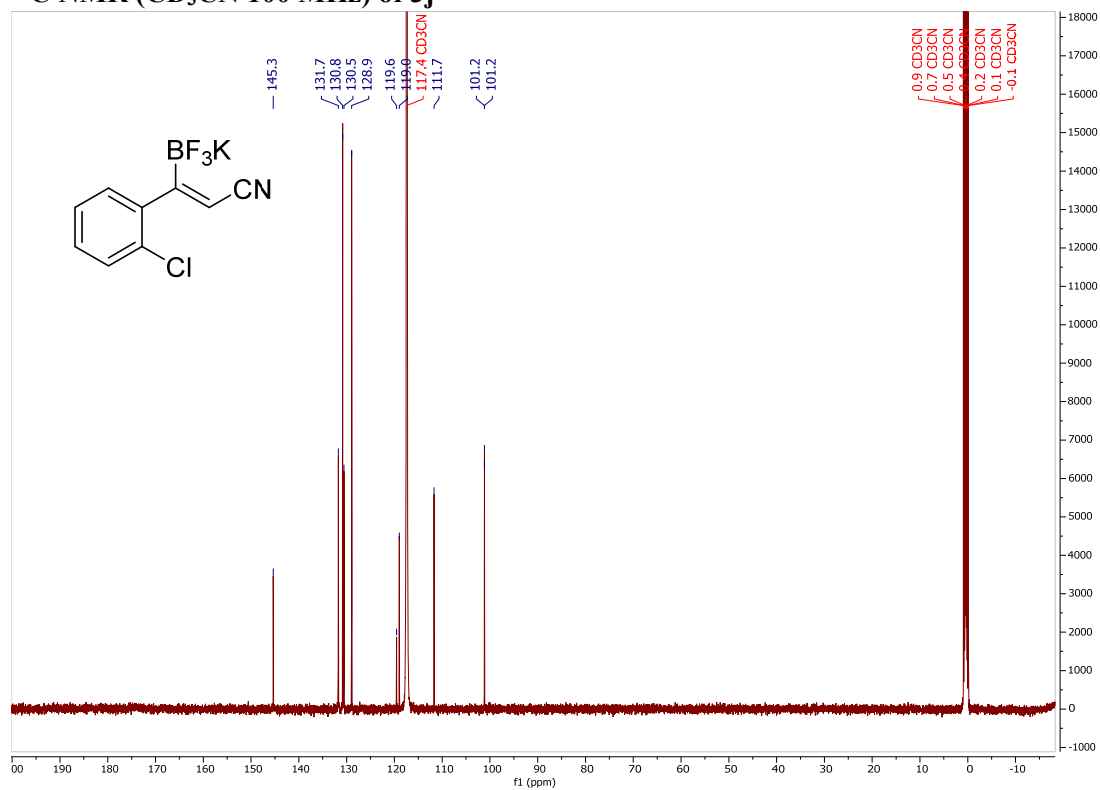

**$^{19}\text{F}$  NMR ( $\text{CD}_3\text{CN}$  376 MHz) of 3j**

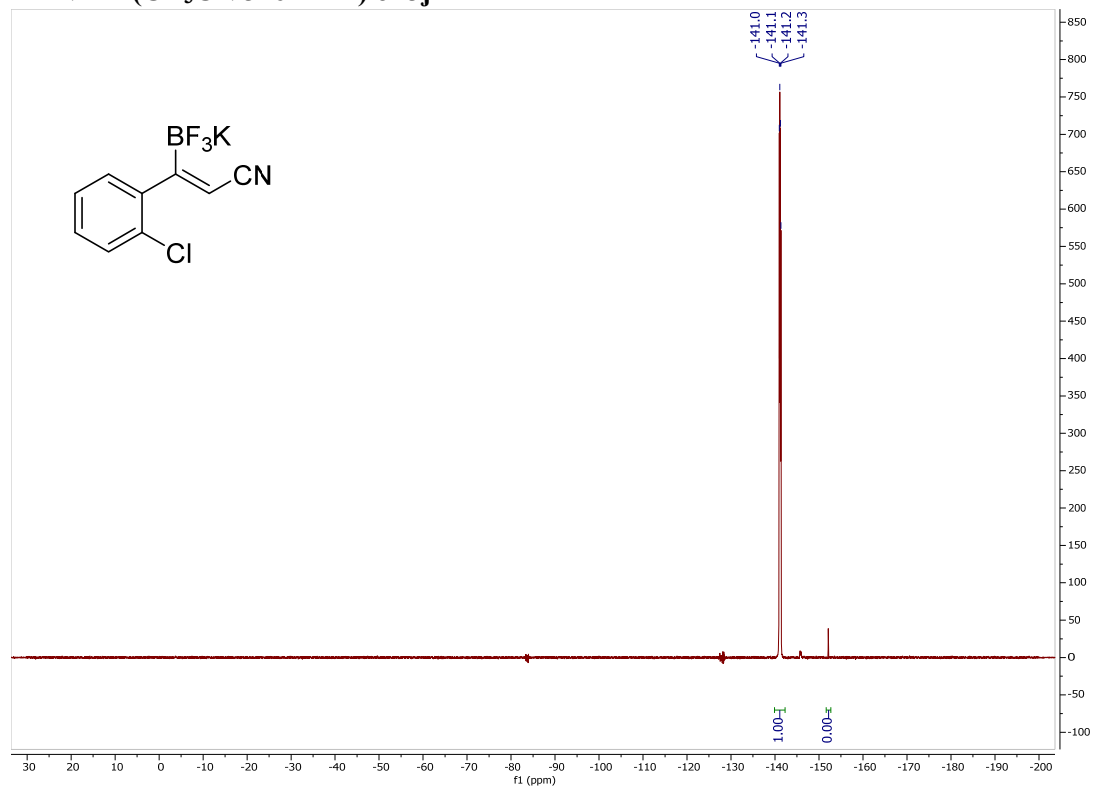

**$^{11}\text{B}$  NMR ( $\text{CD}_3\text{CN}$  128 MHz) of 3j**

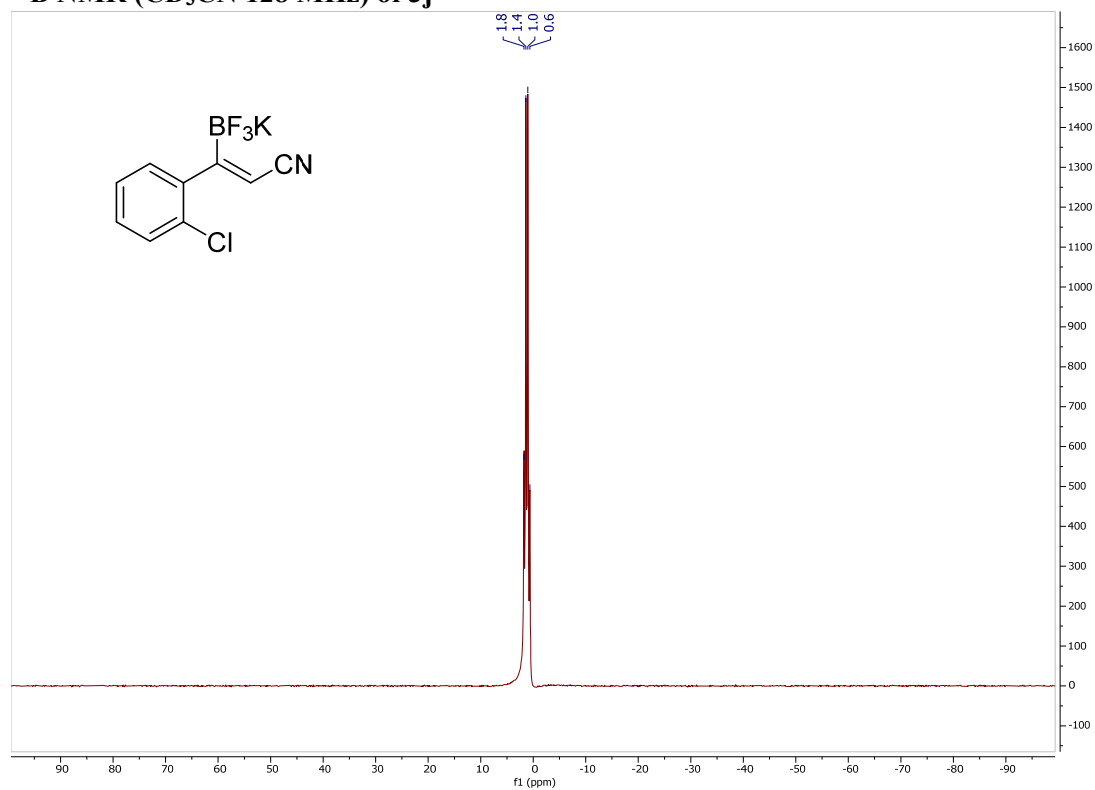

**$^1\text{H}$  NMR ( $\text{CD}_3\text{CN}$  400 MHz) of 3k**

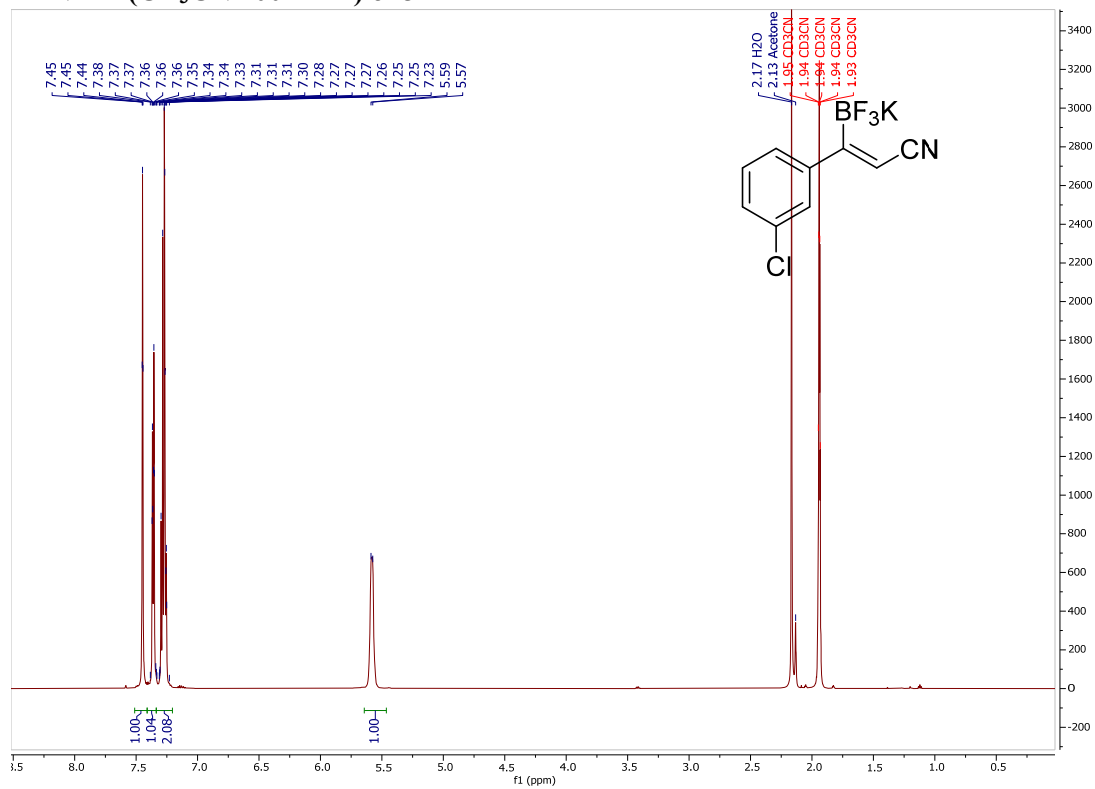

**$^{13}\text{C}$  NMR ( $\text{CD}_3\text{CN}$  100 MHz) of 3k**

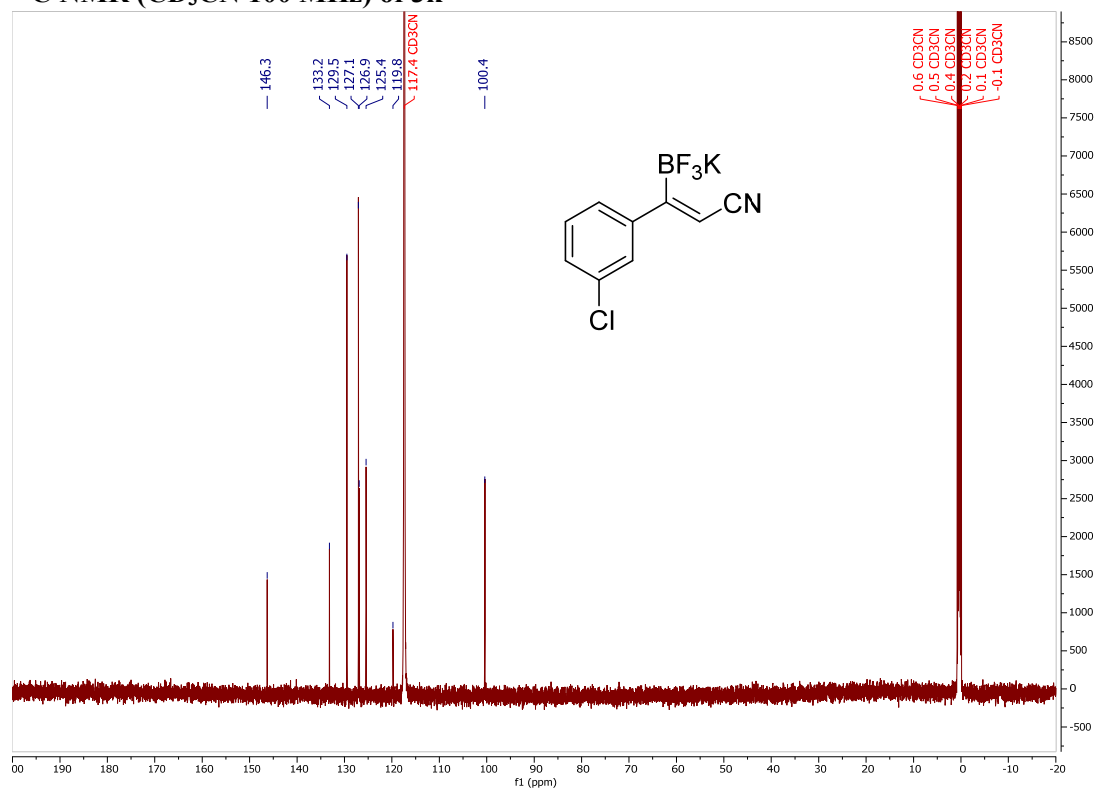

**$^{19}\text{F}$  NMR ( $\text{CD}_3\text{CN}$  376 MHz) of 3k**

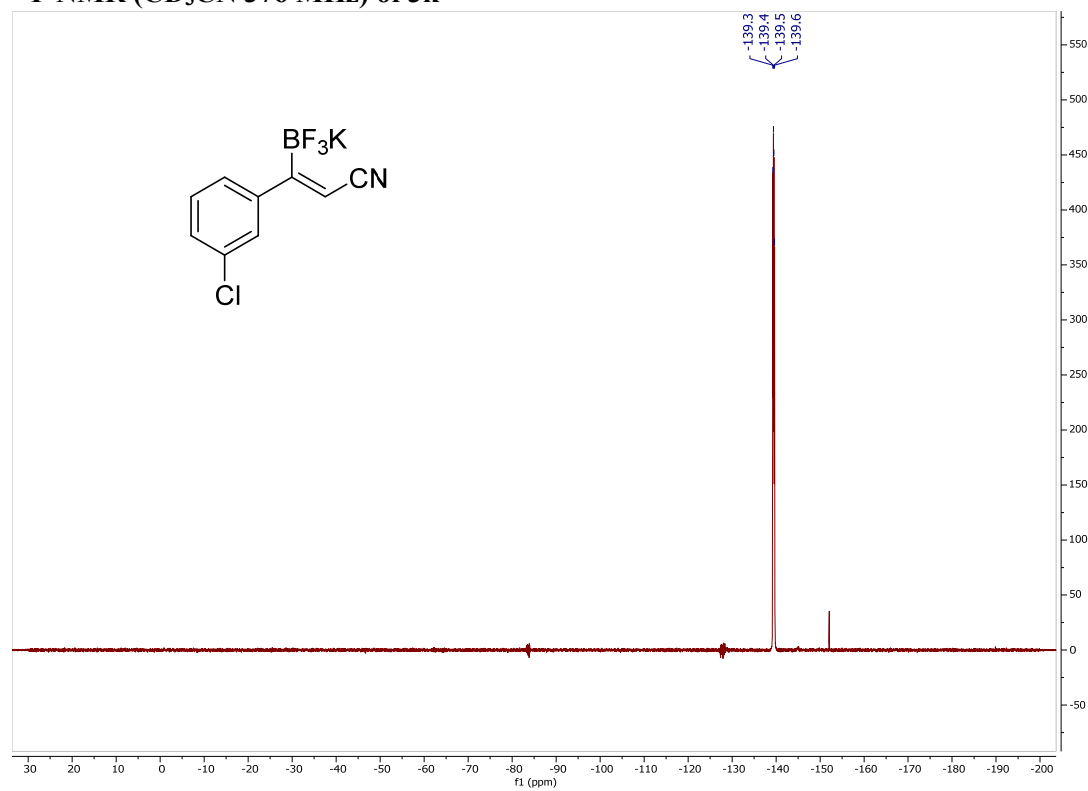

**$^{11}\text{B}$  NMR ( $\text{CD}_3\text{CN}$  128 MHz) of 3k**

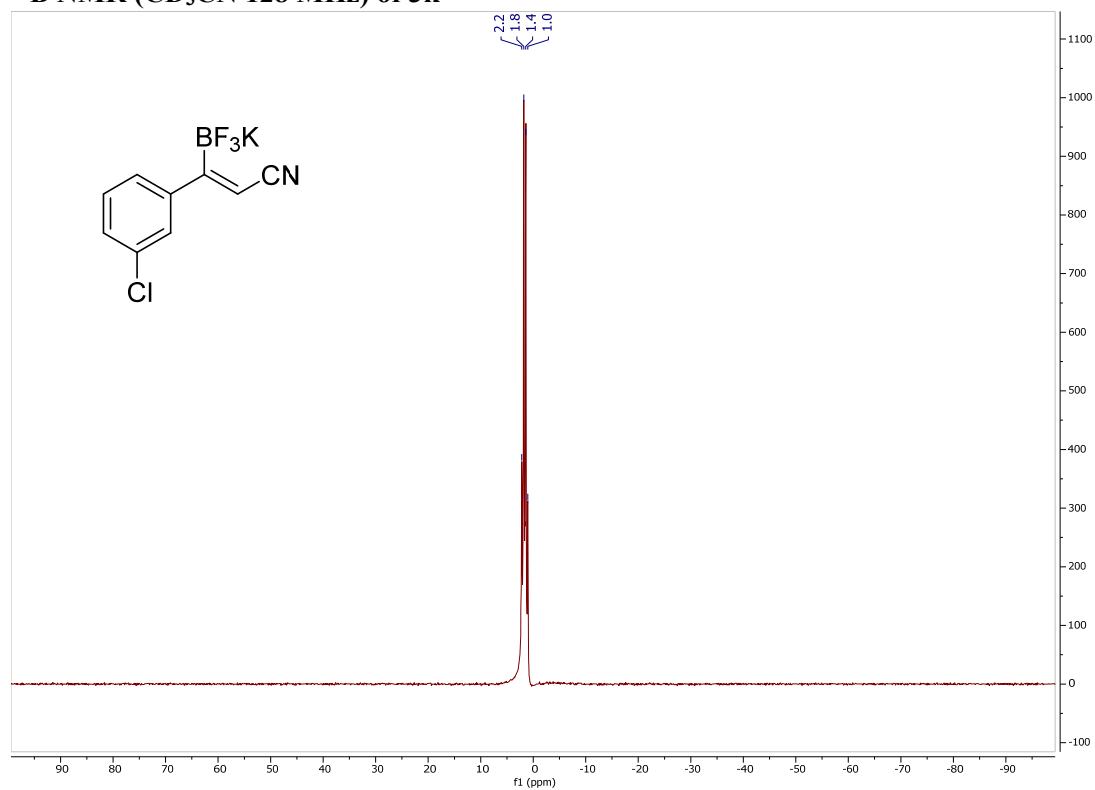

**$^1\text{H}$  NMR ( $\text{CD}_3\text{CN}$  400 MHz) of 3l**

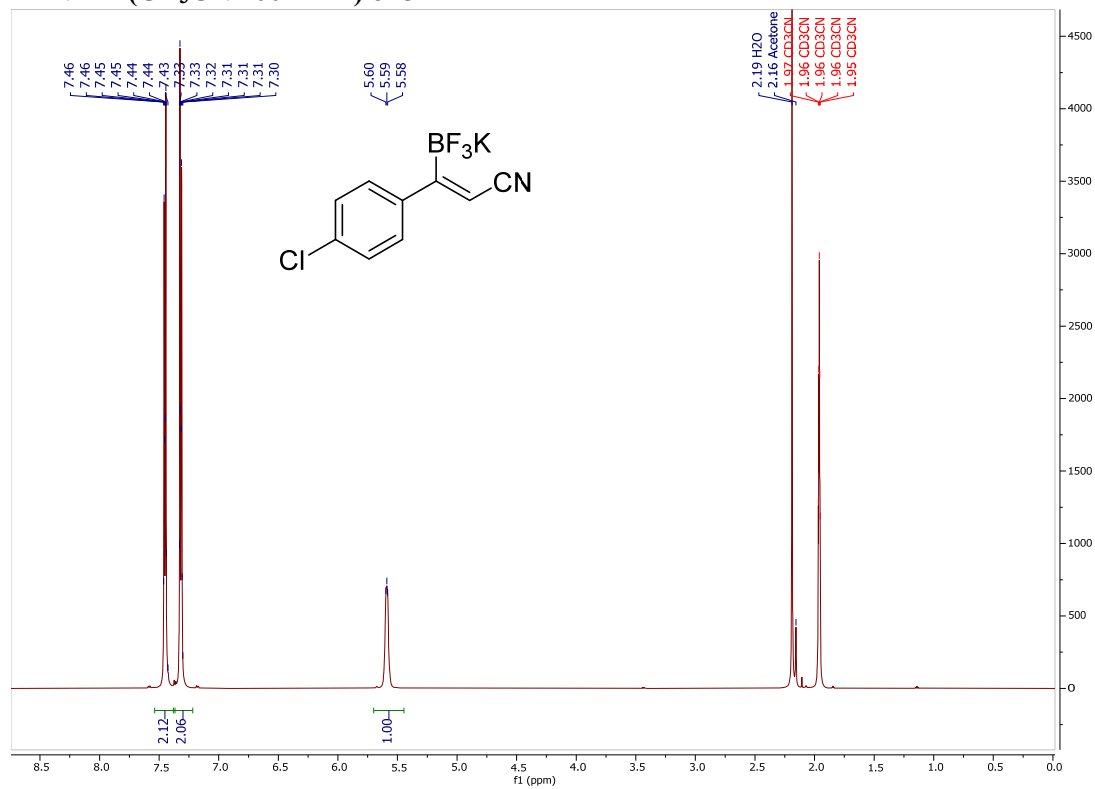

**$^{13}\text{C}$  NMR ( $\text{CD}_3\text{CN}$  100 MHz) of 31**

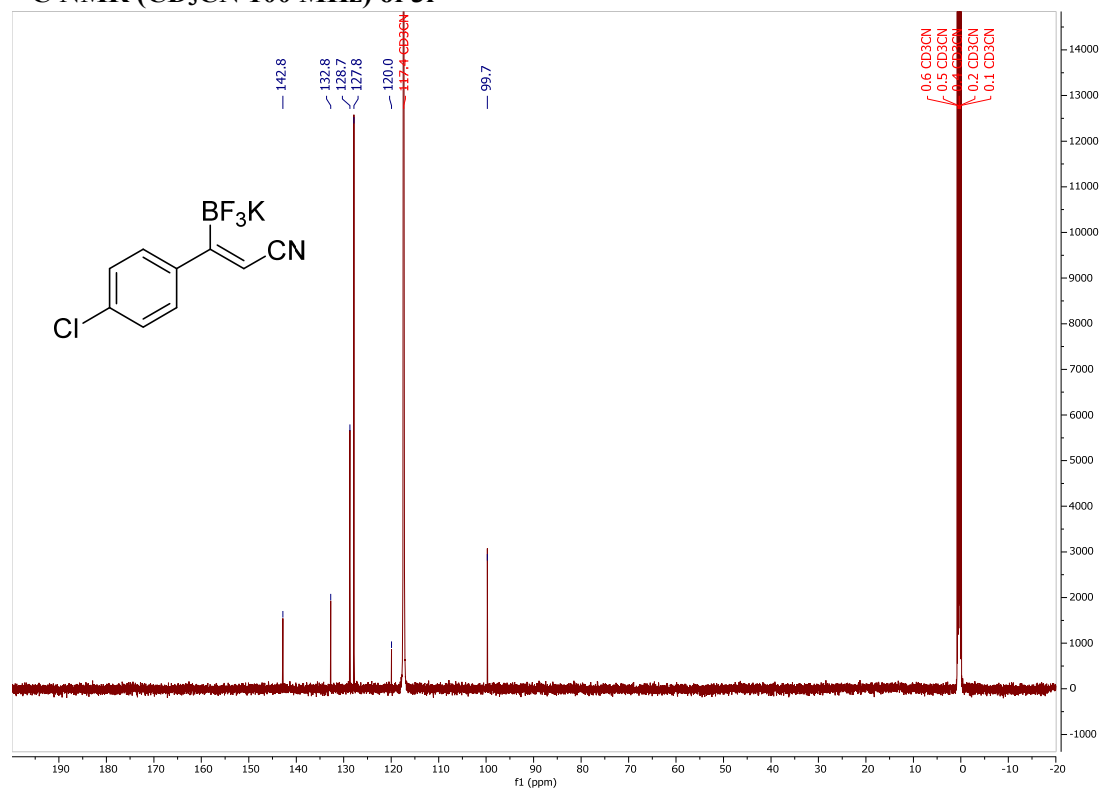

**$^{19}\text{F}$  NMR ( $\text{CD}_3\text{CN}$  376 MHz) of 31**

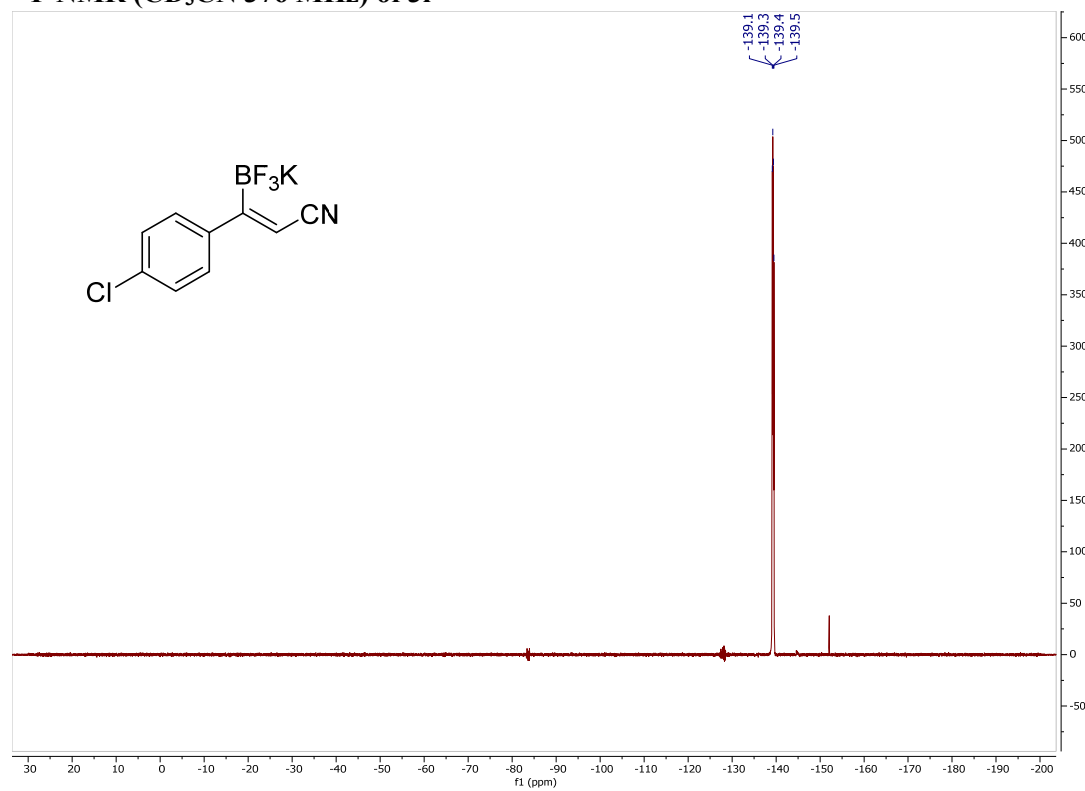



**$^{11}\text{B}$  NMR ( $\text{CD}_3\text{CN}$  128 MHz) of 3l**

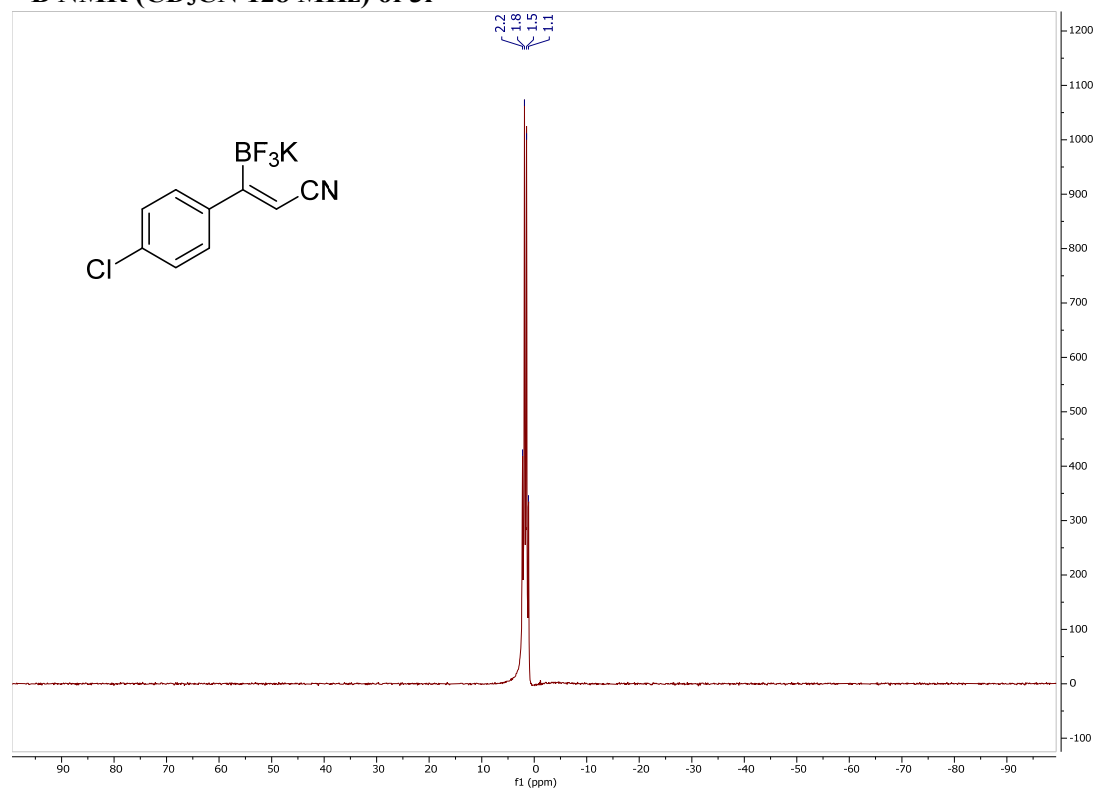

**$^1\text{H}$  NMR ( $\text{CD}_3\text{CN}$  400 MHz) of 3m**

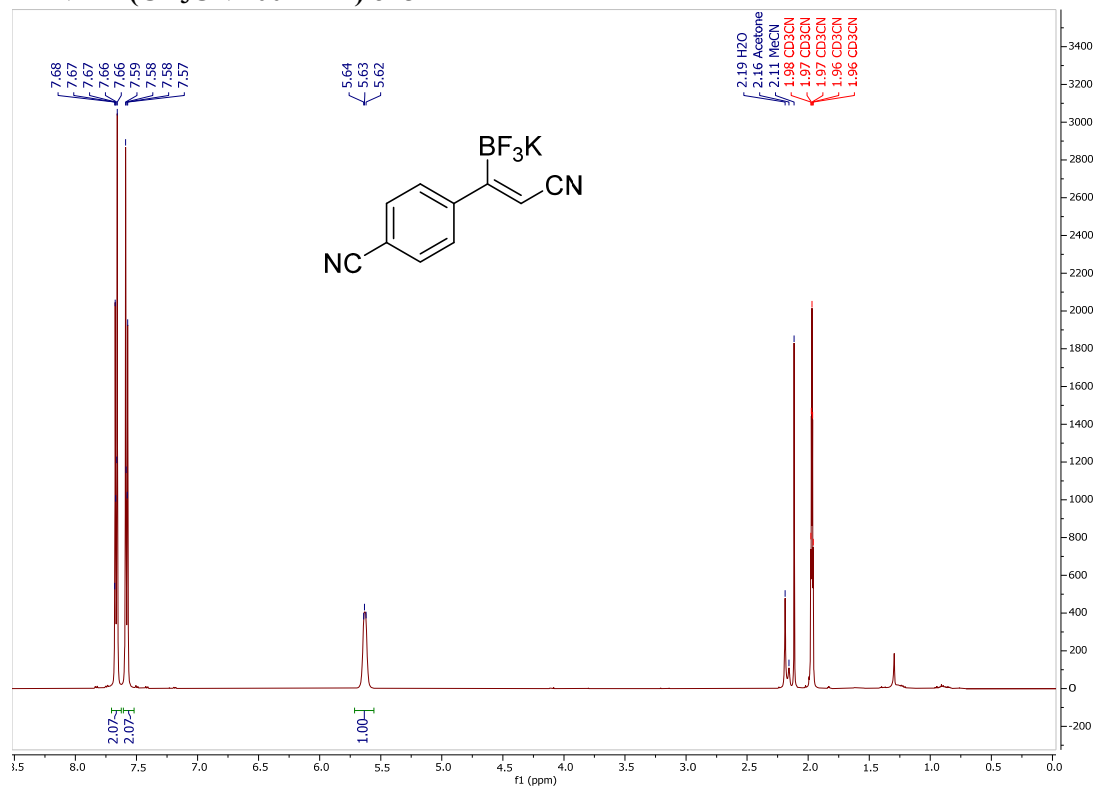

**$^{13}\text{C}$  NMR ( $\text{CD}_3\text{CN}$  100 MHz) of 3m**

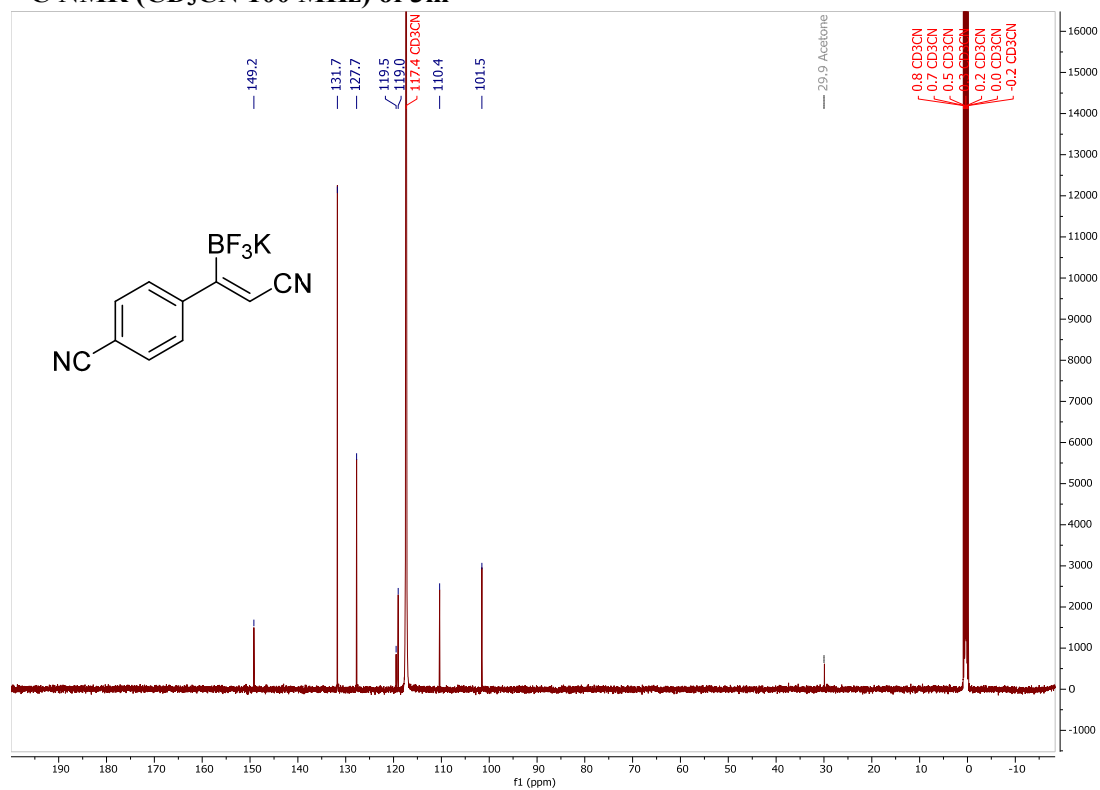

**$^{19}\text{F}$  NMR ( $\text{CD}_3\text{CN}$  376 MHz) of 3m**

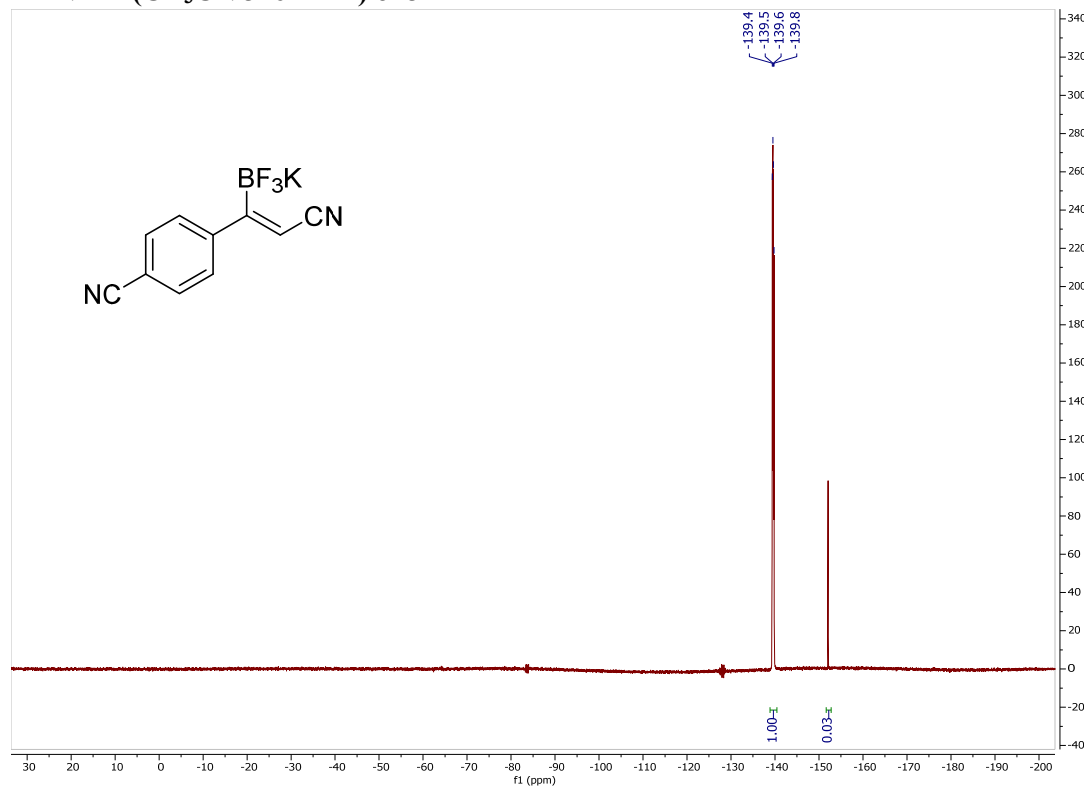

**$^{11}\text{B}$  NMR ( $\text{CD}_3\text{CN}$  128 MHz) of 3m**

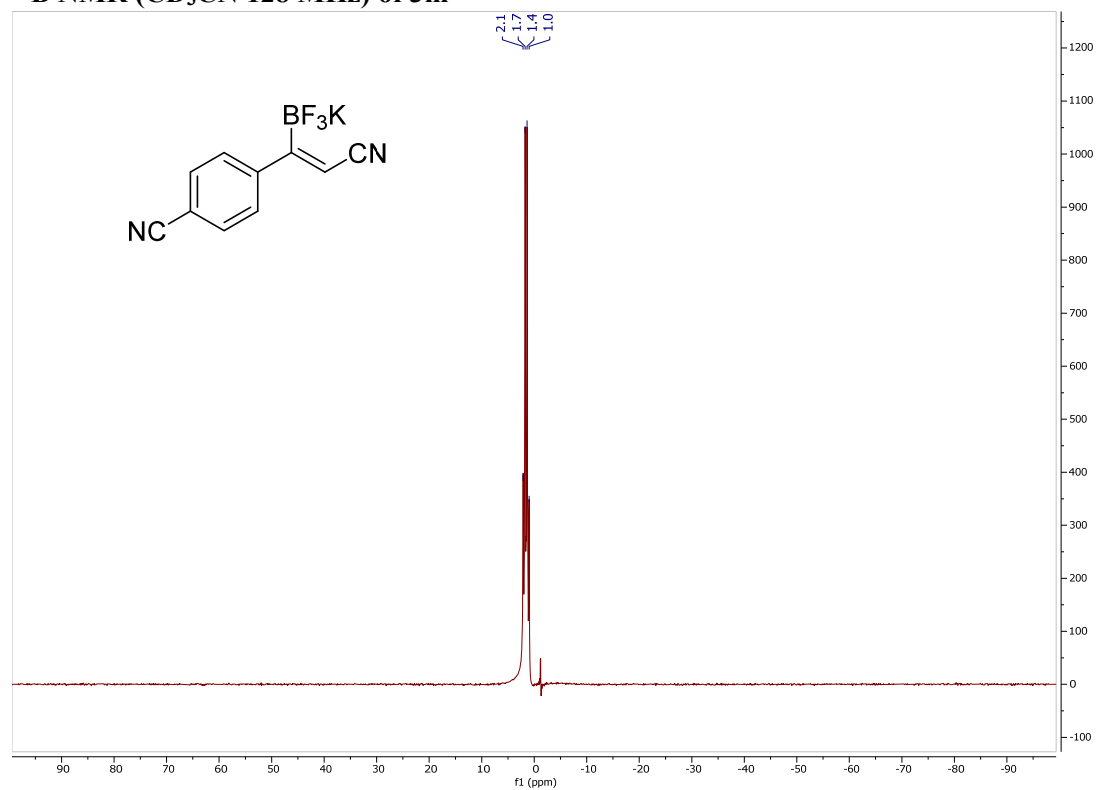

**$^1\text{H}$  NMR ( $\text{CD}_3\text{CN}$  400 MHz) of 3n**

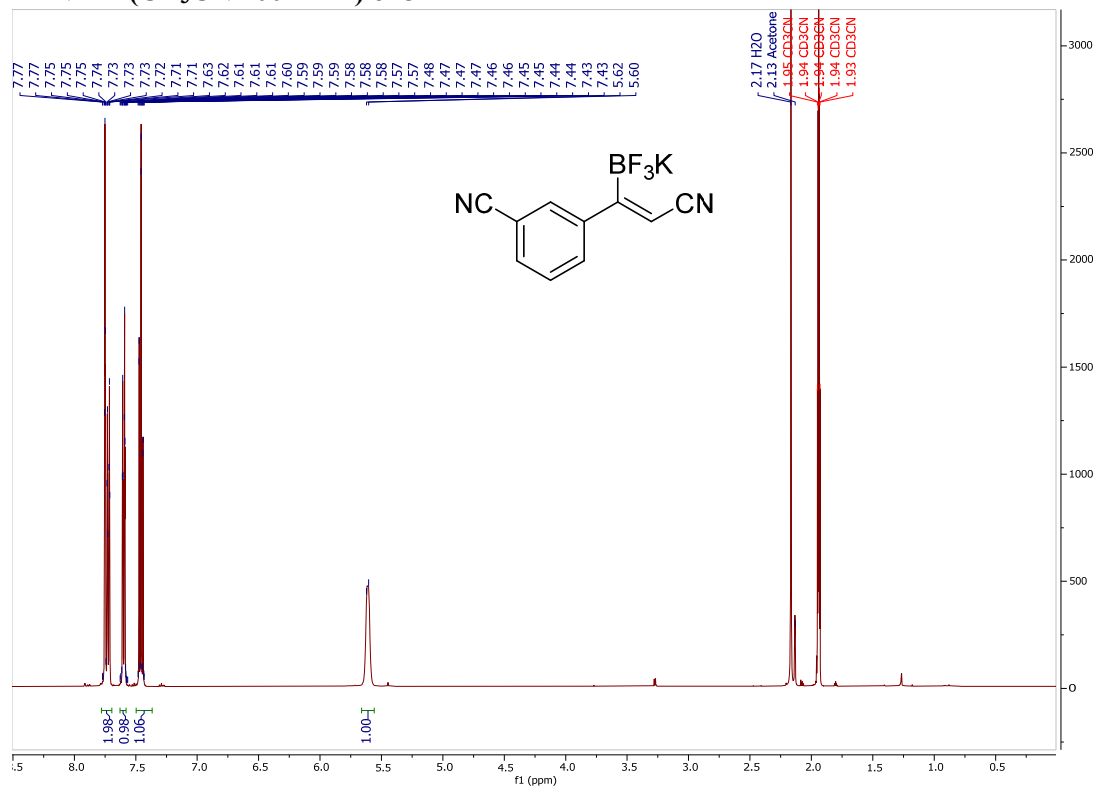

**<sup>13</sup>C NMR (CD<sub>3</sub>CN 100 MHz) of 3n**

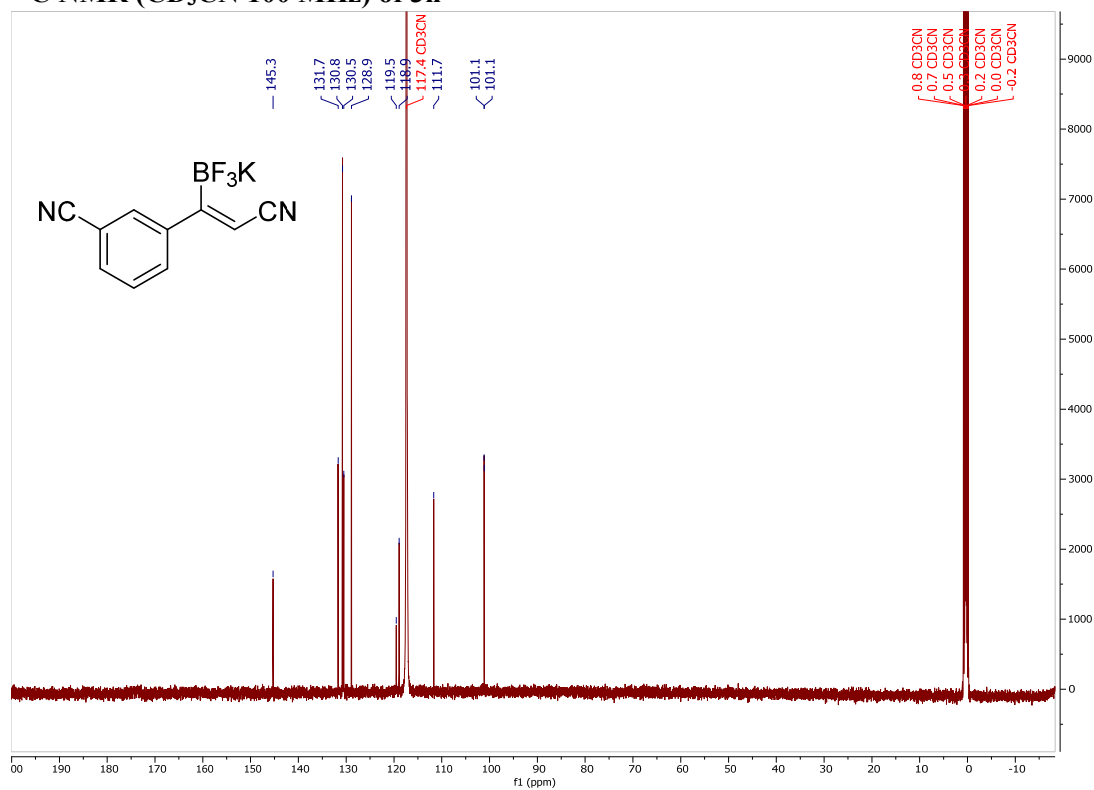

**<sup>19</sup>F NMR (CD<sub>3</sub>CN 376 MHz) of 3n**

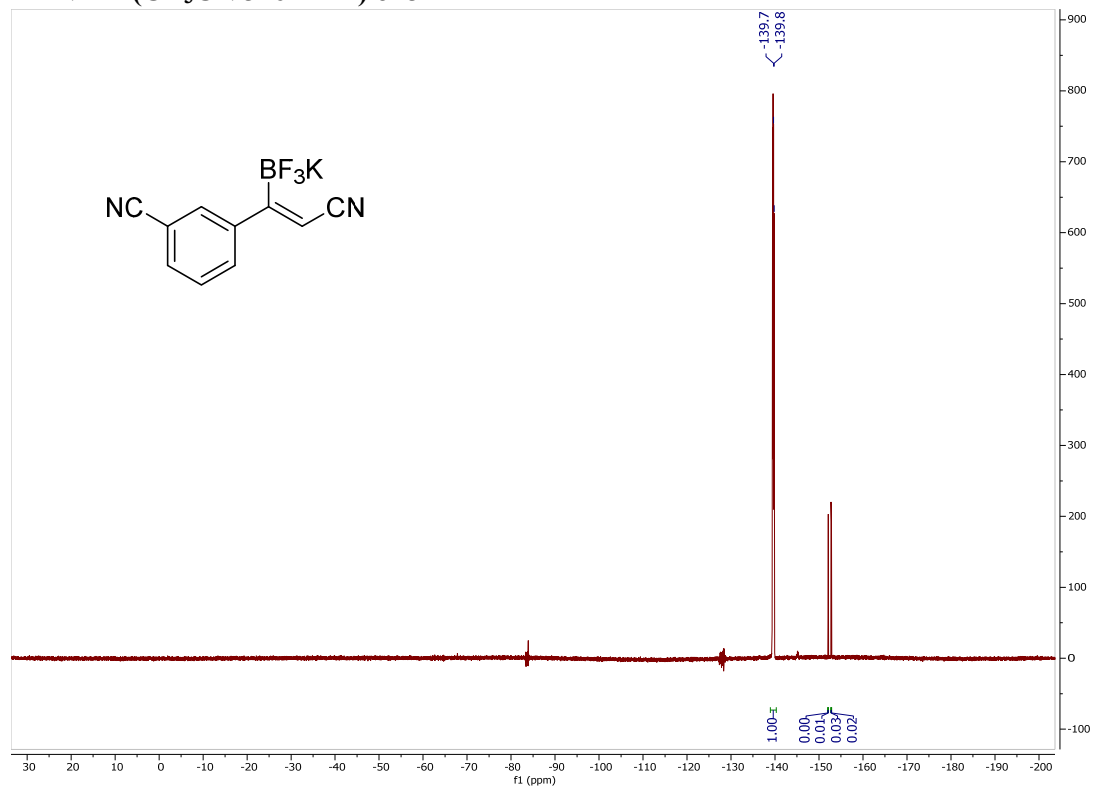

**$^{11}\text{B}$  NMR ( $\text{CD}_3\text{CN}$  128 MHz) of 3n**

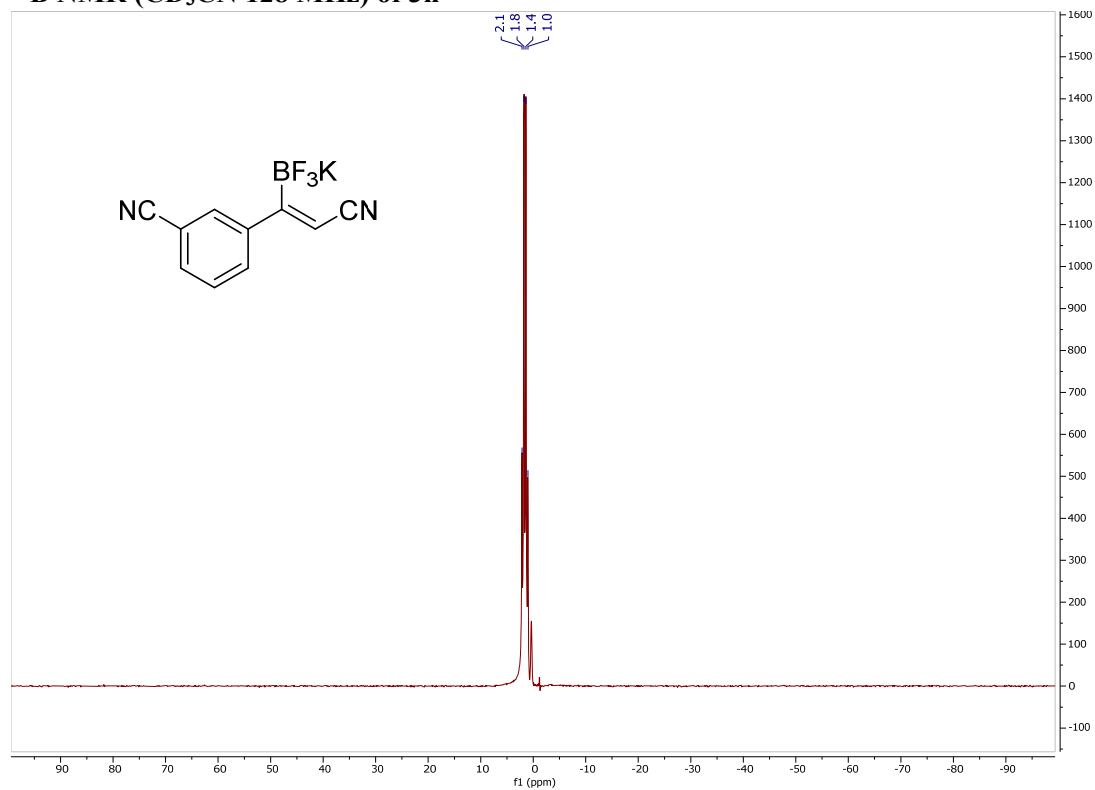

**$^1\text{H}$  NMR ( $\text{DMSO-}d_6$  400 MHz) of 3o**

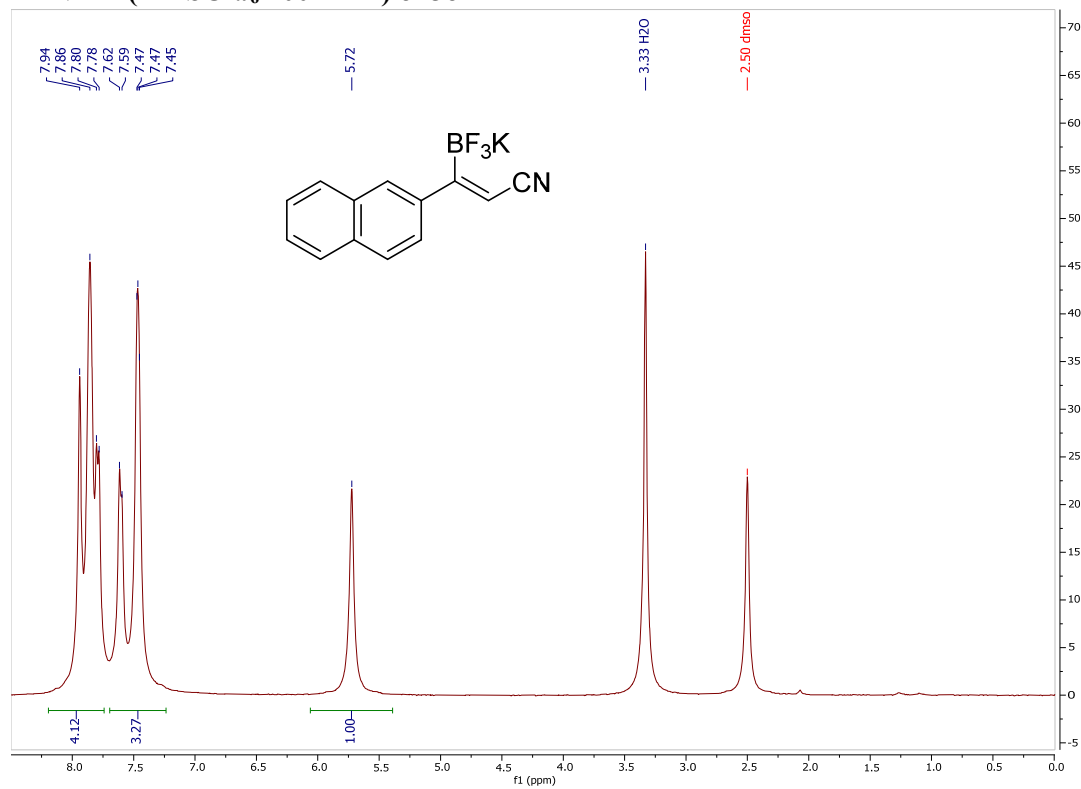

**<sup>13</sup>C NMR (DMSO-*d*<sub>6</sub> 100 MHz) of 3o**

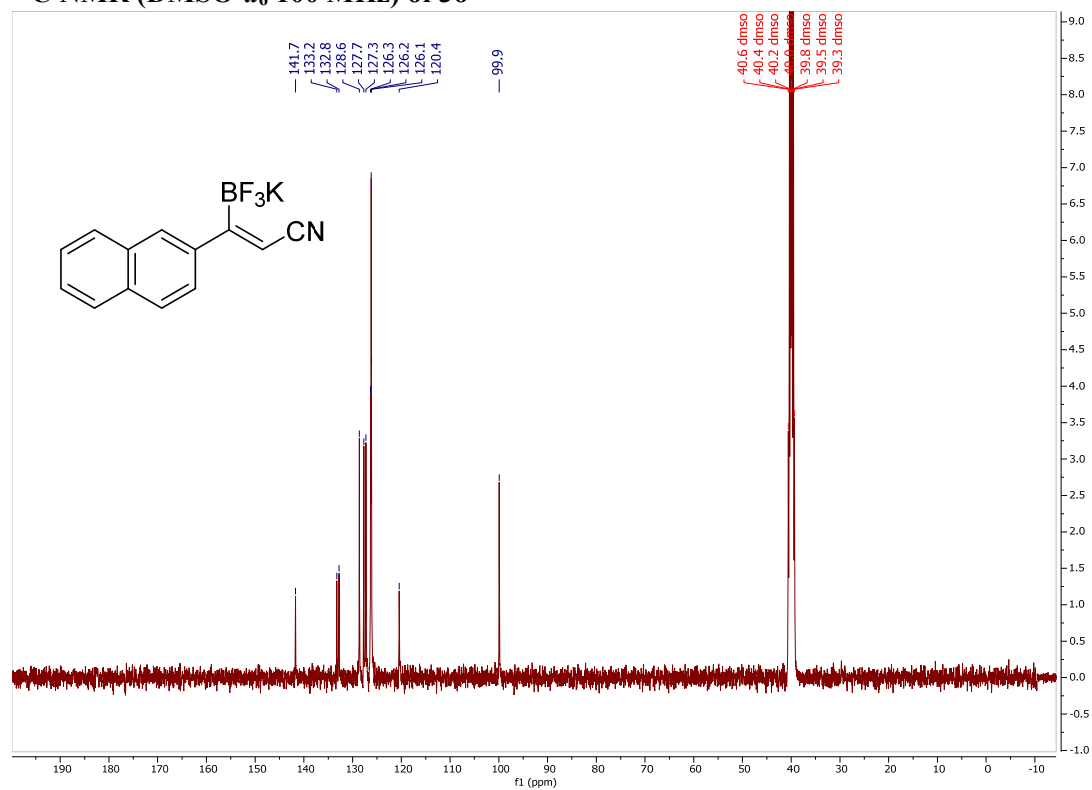

**<sup>19</sup>F NMR (DMSO-*d*<sub>6</sub> 376 MHz) of 3o**

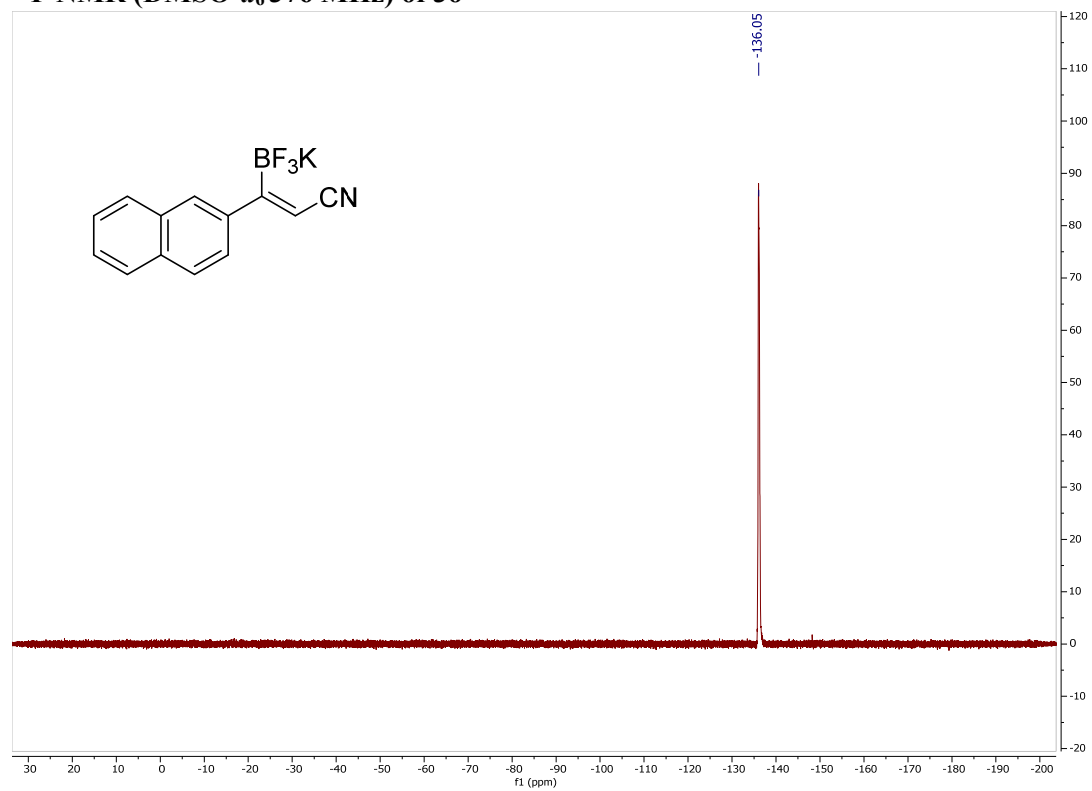

**$^{11}\text{B}$  NMR (DMSO- $d_6$  128 MHz) of 3o**

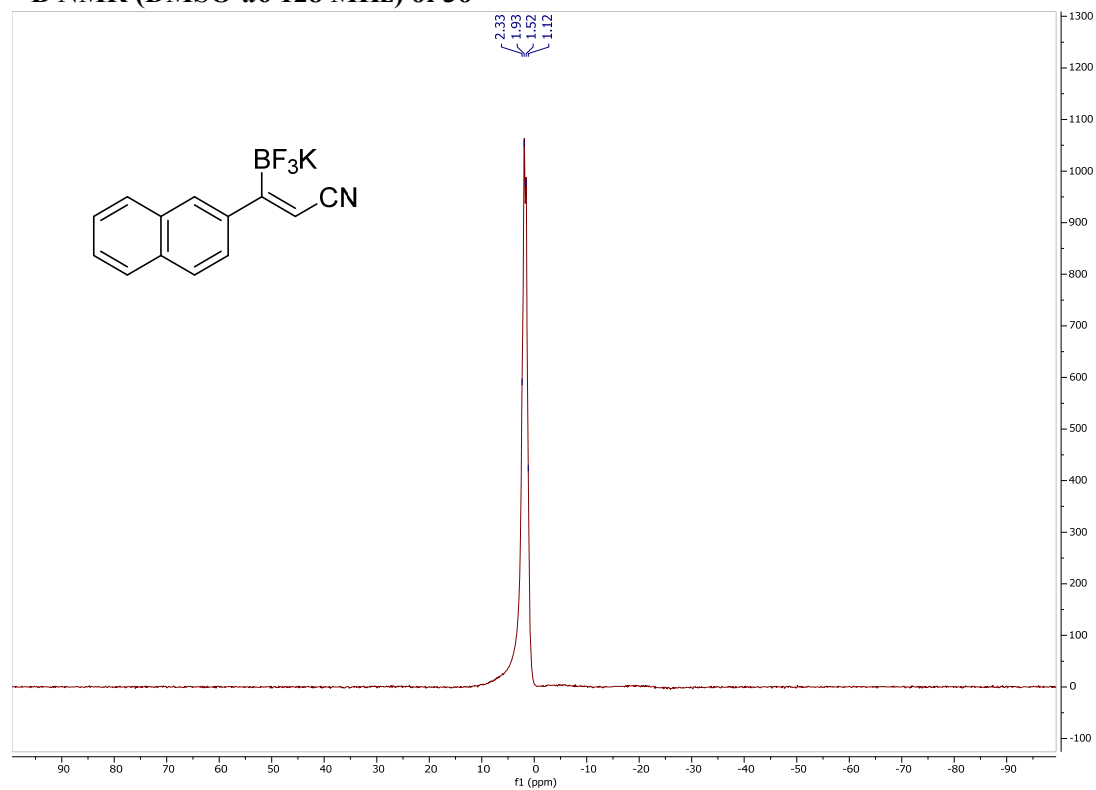

**$^1\text{H}$  NMR (CD $_3$ CN 400 MHz) of 3p**

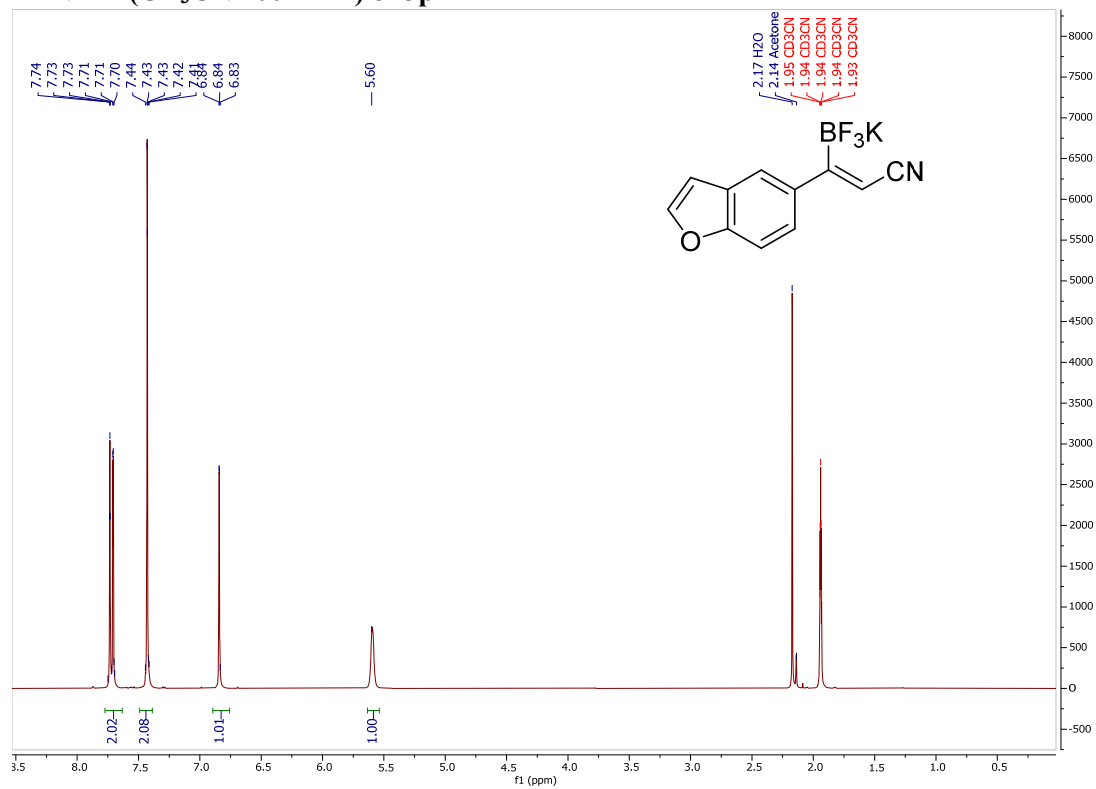

**<sup>13</sup>C NMR (CD<sub>3</sub>CN 100 MHz) of 3o**

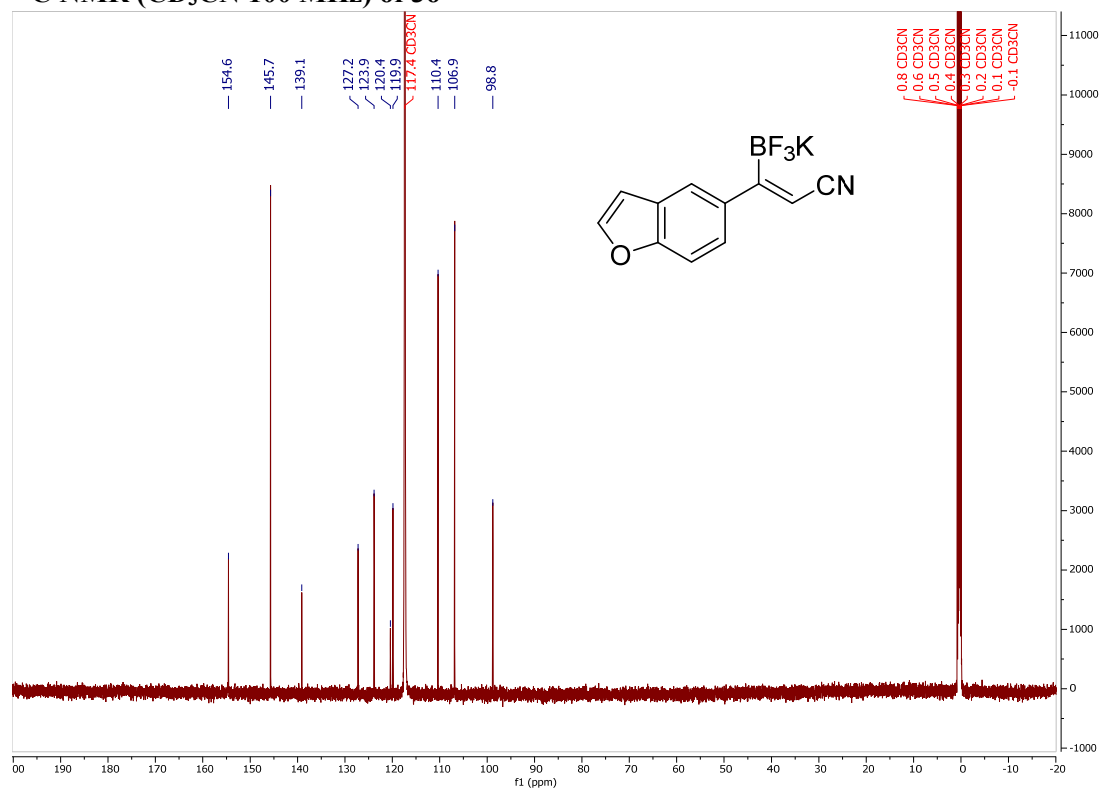

**<sup>19</sup>F NMR (CD<sub>3</sub>CN 376 MHz) of 3p**

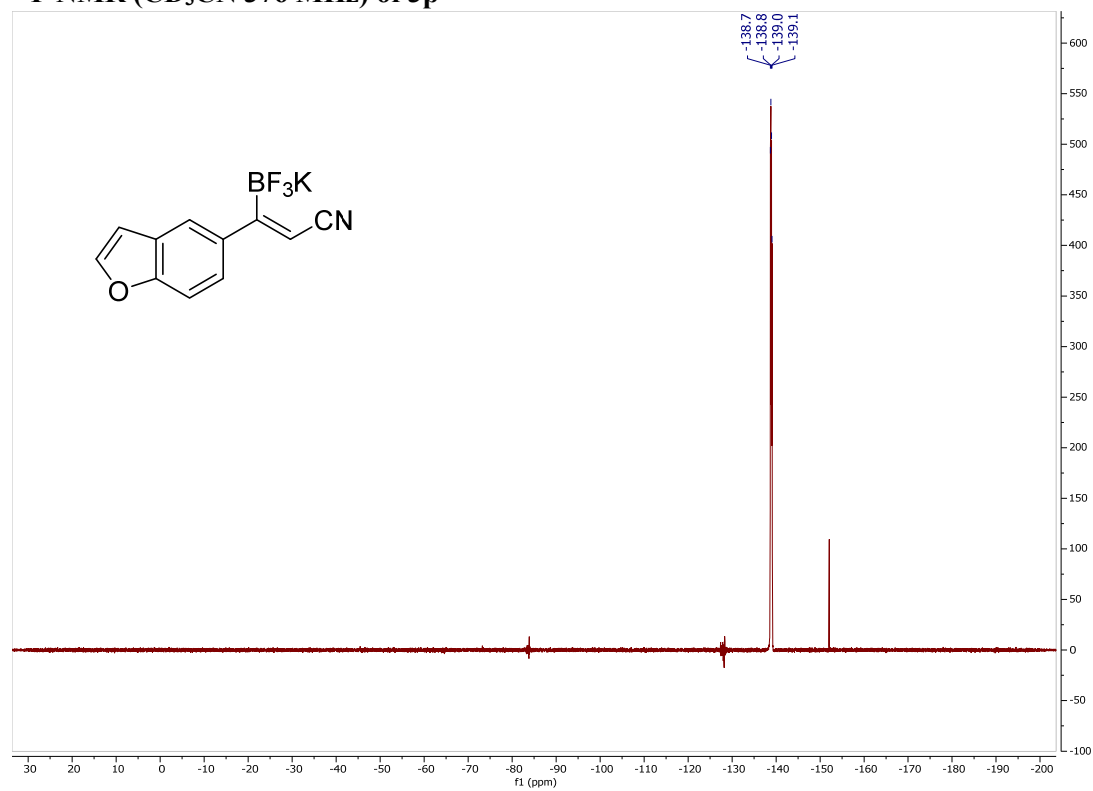



**<sup>11</sup>B NMR (CD<sub>3</sub>CN 128 MHz) of 3p**

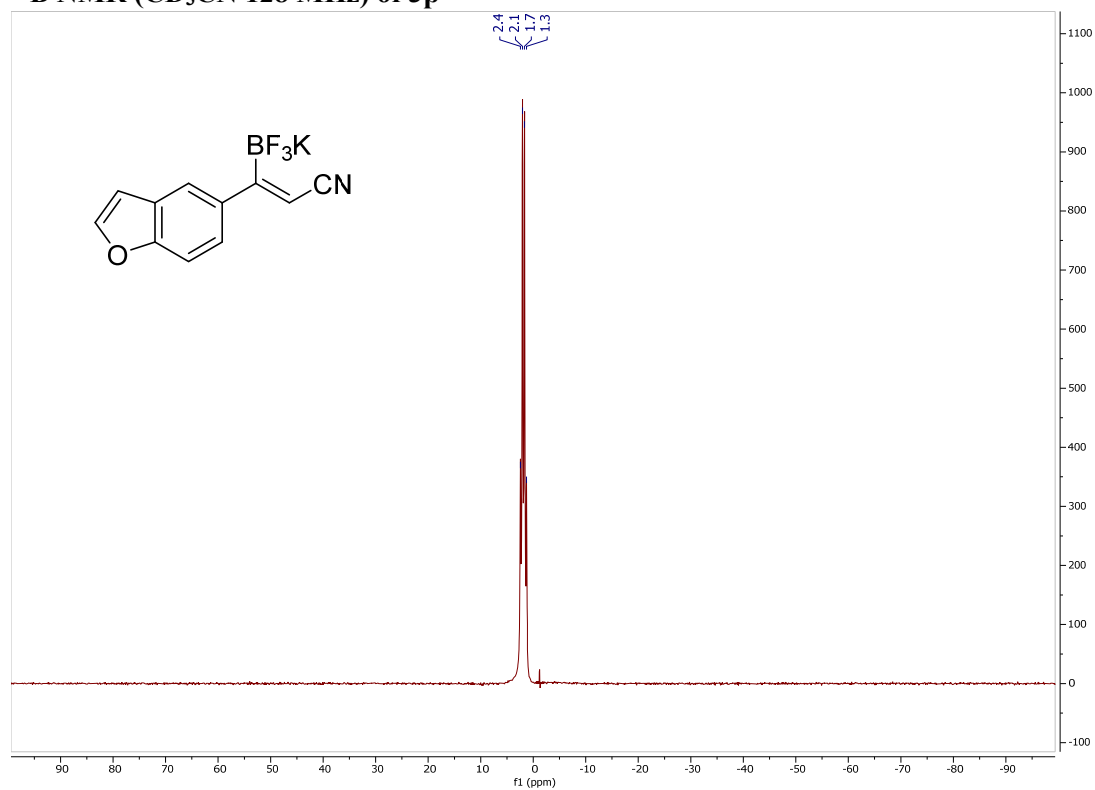

**<sup>1</sup>H NMR (CD<sub>3</sub>CN 400 MHz) of 3q**

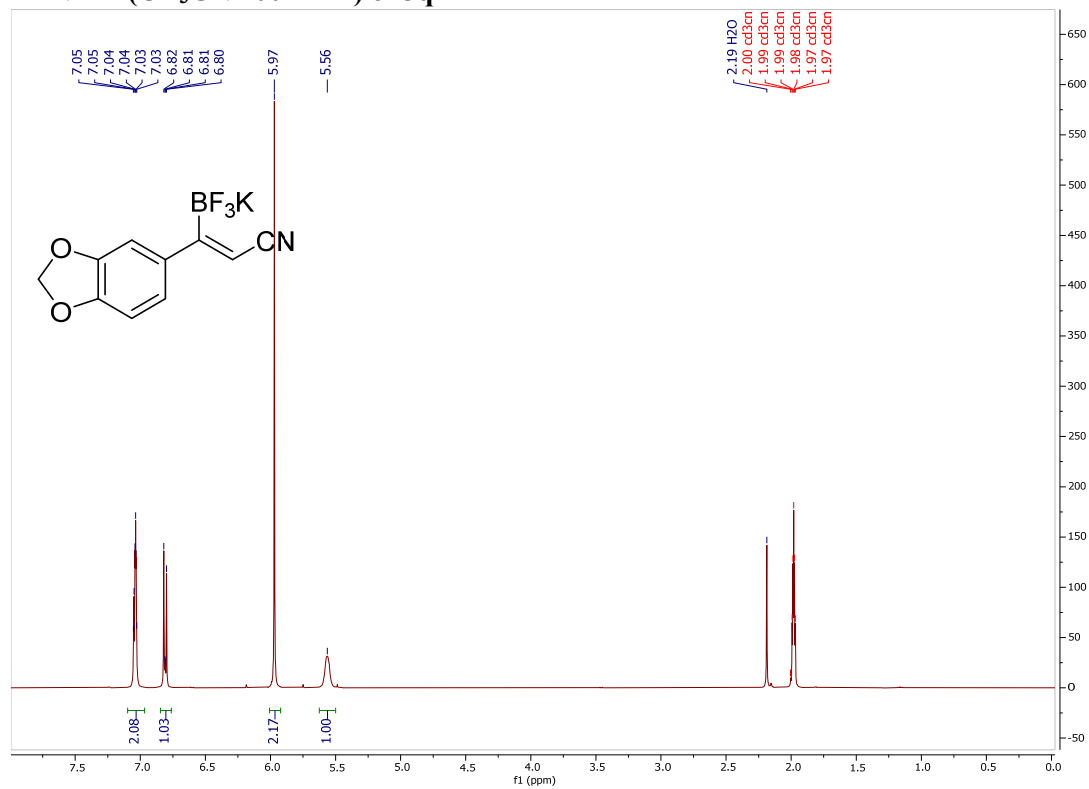

**<sup>13</sup>C NMR (CD<sub>3</sub>CN 100 MHz) of 3q**

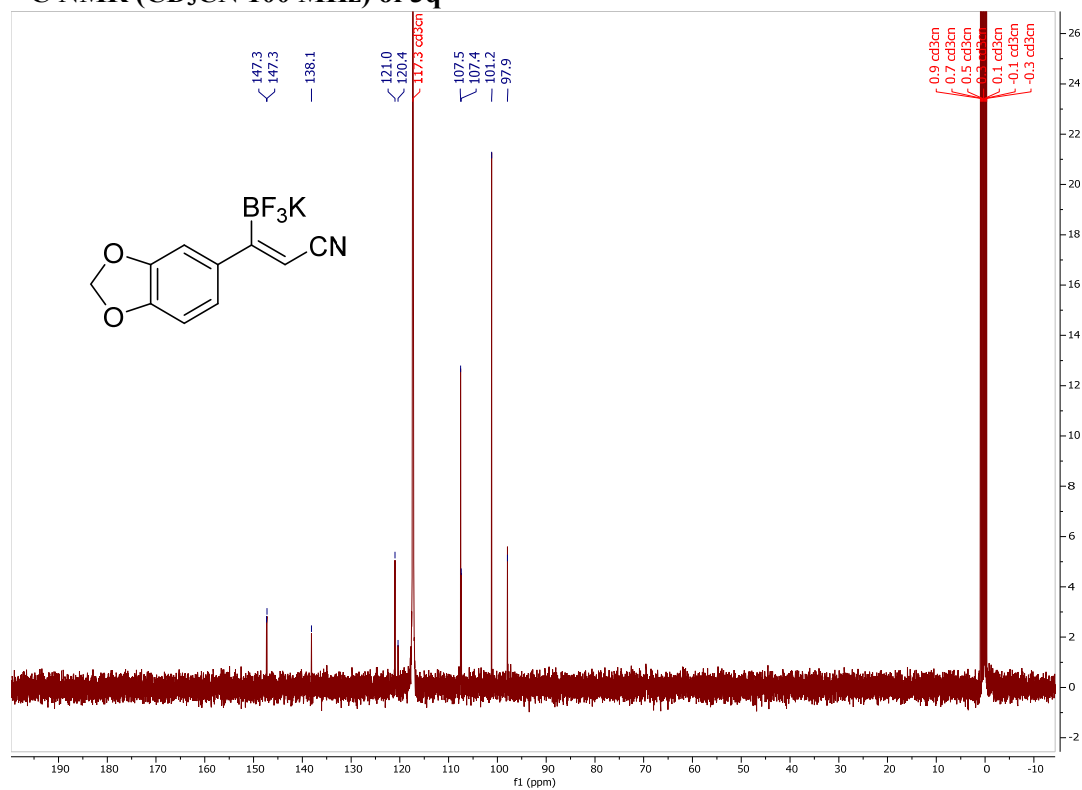

**<sup>19</sup>F NMR (CD<sub>3</sub>CN 376 MHz) of 3q**

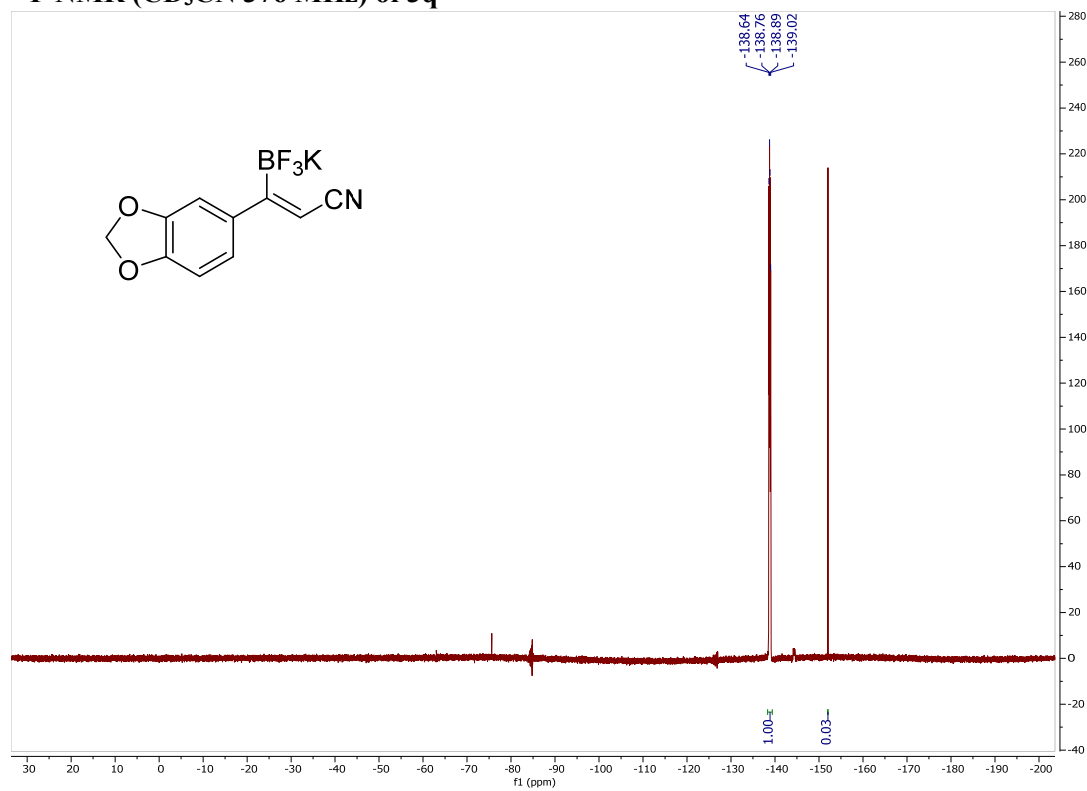

**<sup>11</sup>B NMR (CD<sub>3</sub>CN 128 MHz) of 3q**

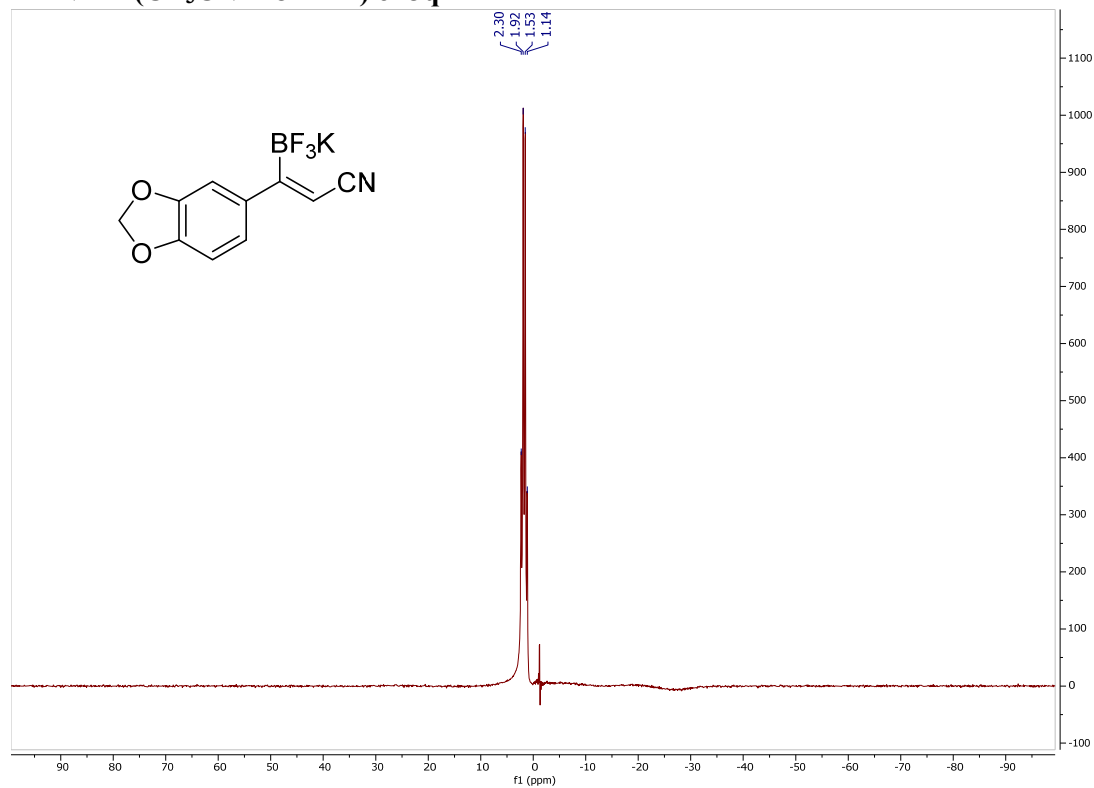

**<sup>1</sup>H NMR (CD<sub>3</sub>CN 400 MHz) of 3r**

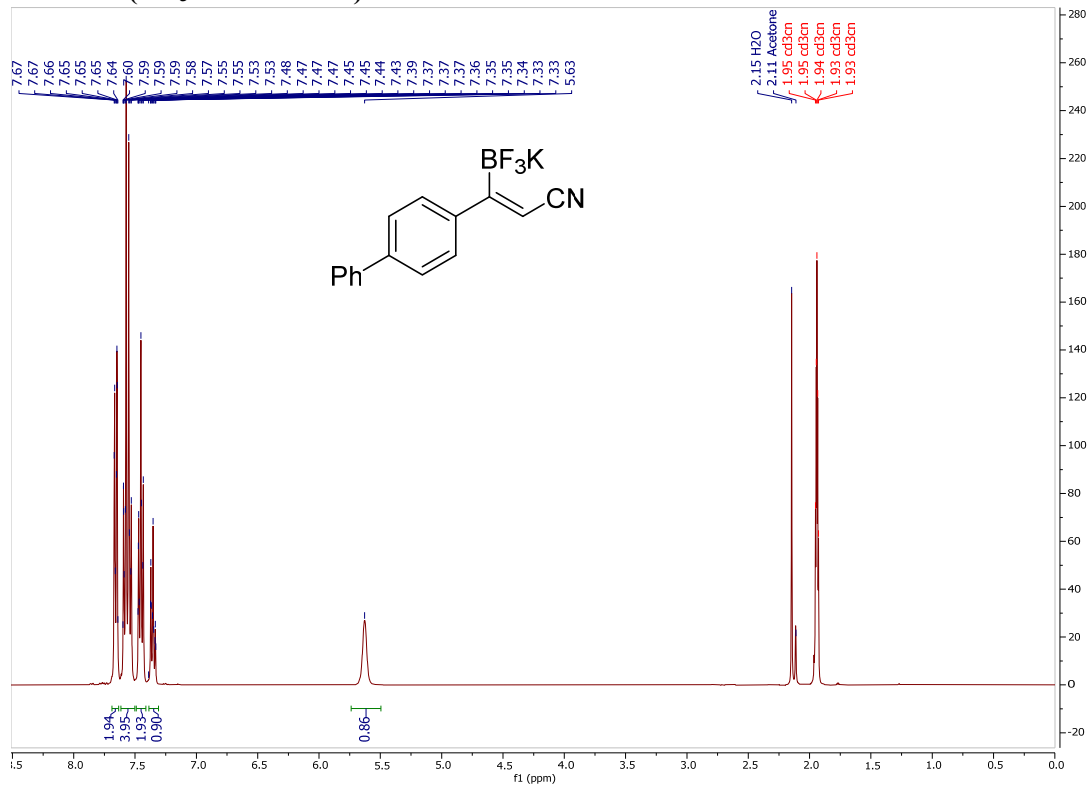

**$^{13}\text{C}$  NMR ( $\text{CD}_3\text{CN}$  100 MHz) of 3r**

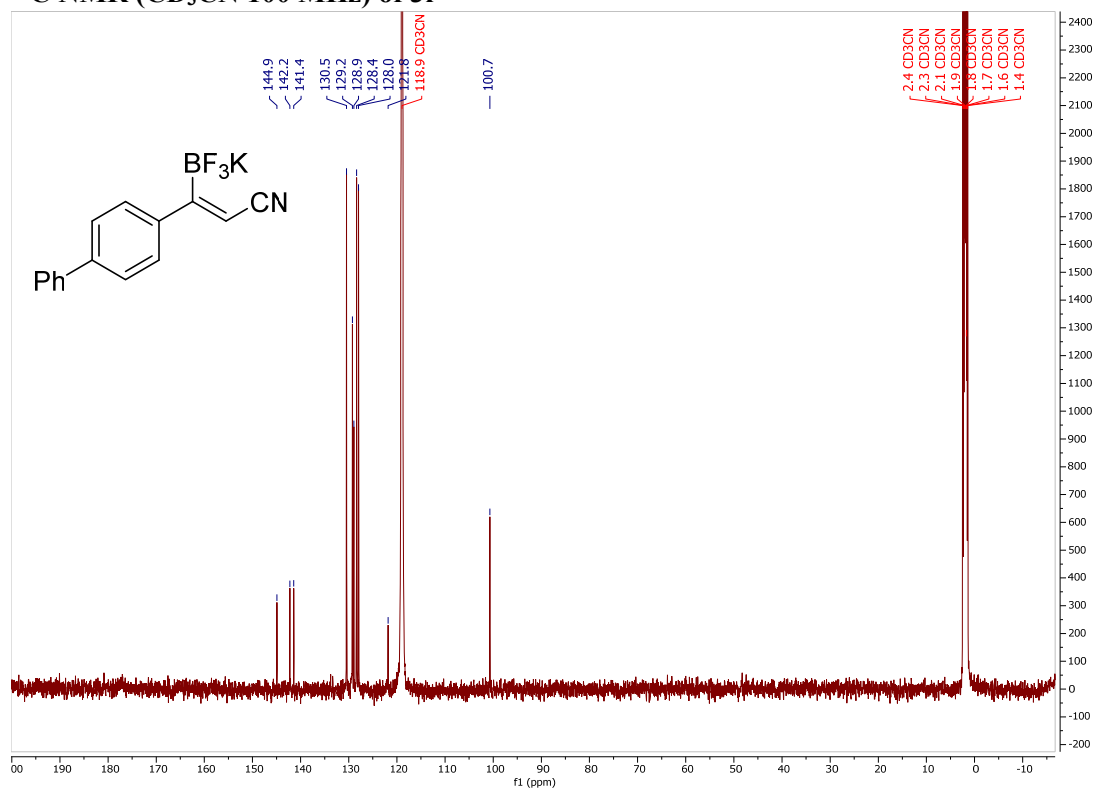

**$^{19}\text{F}$  NMR ( $\text{CD}_3\text{CN}$  376 MHz) of 3r**

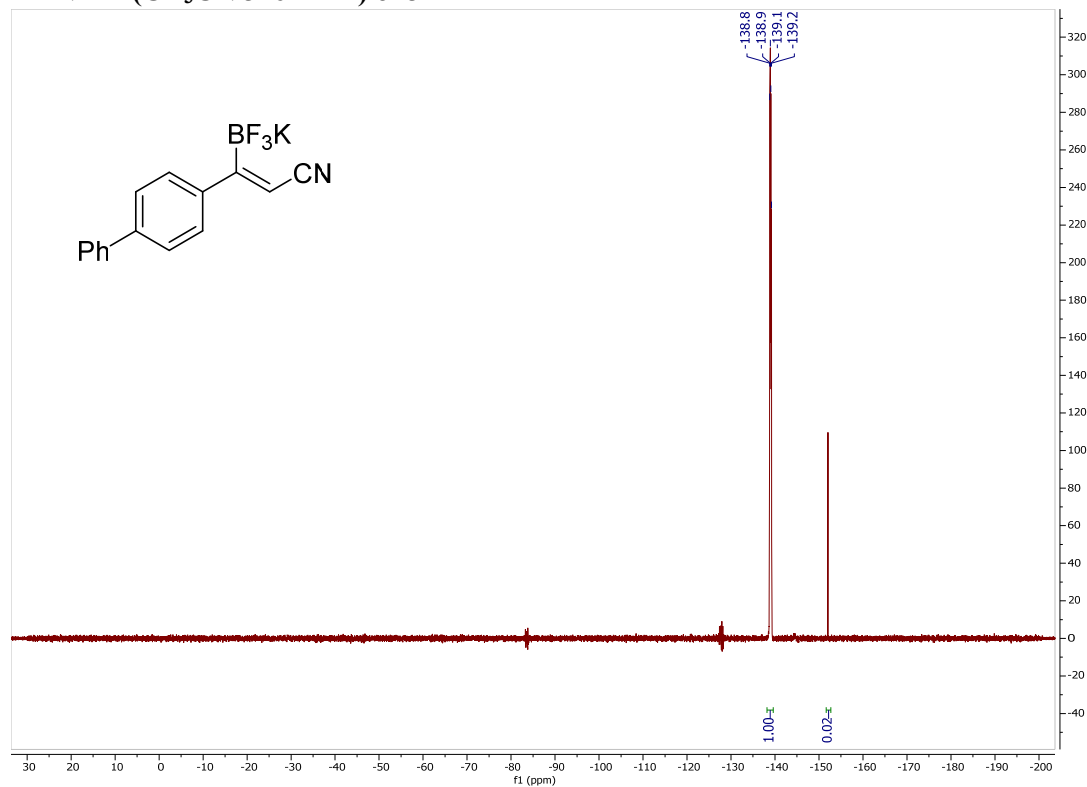

**$^{11}\text{B}$  NMR ( $\text{CD}_3\text{CN}$  128 MHz) of 3r**

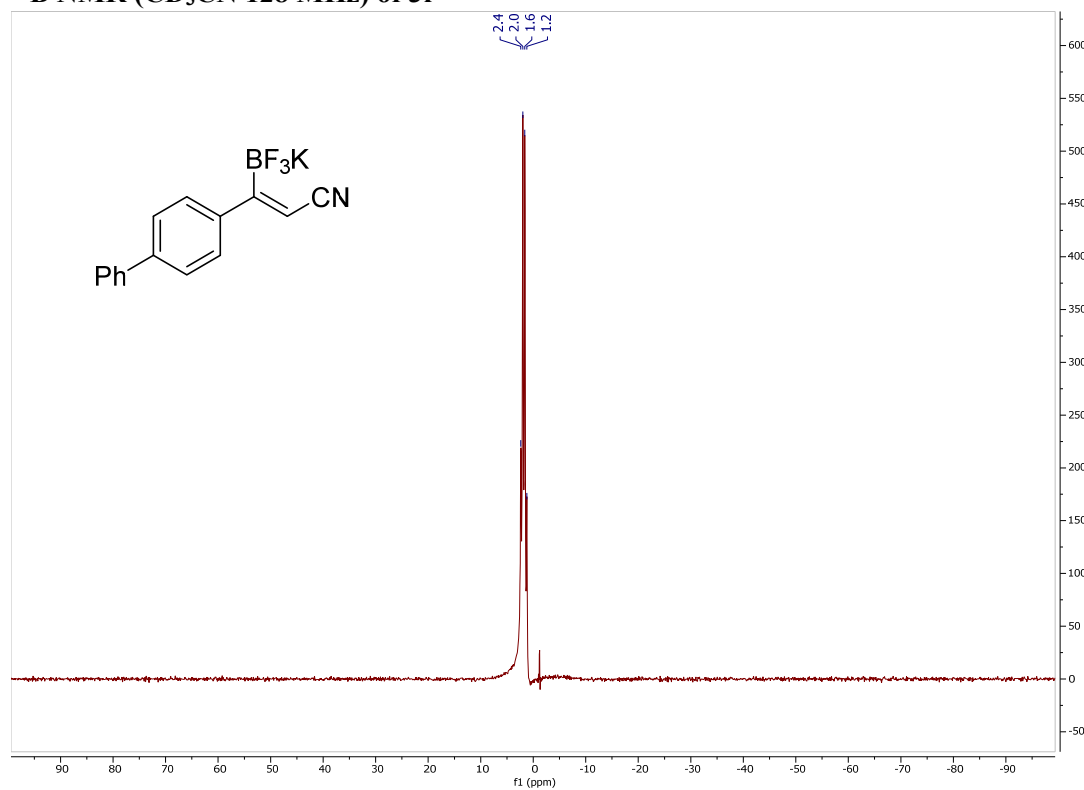

**$^1\text{H}$  NMR ( $\text{CD}_3\text{CN}$  400 MHz) of 3s**

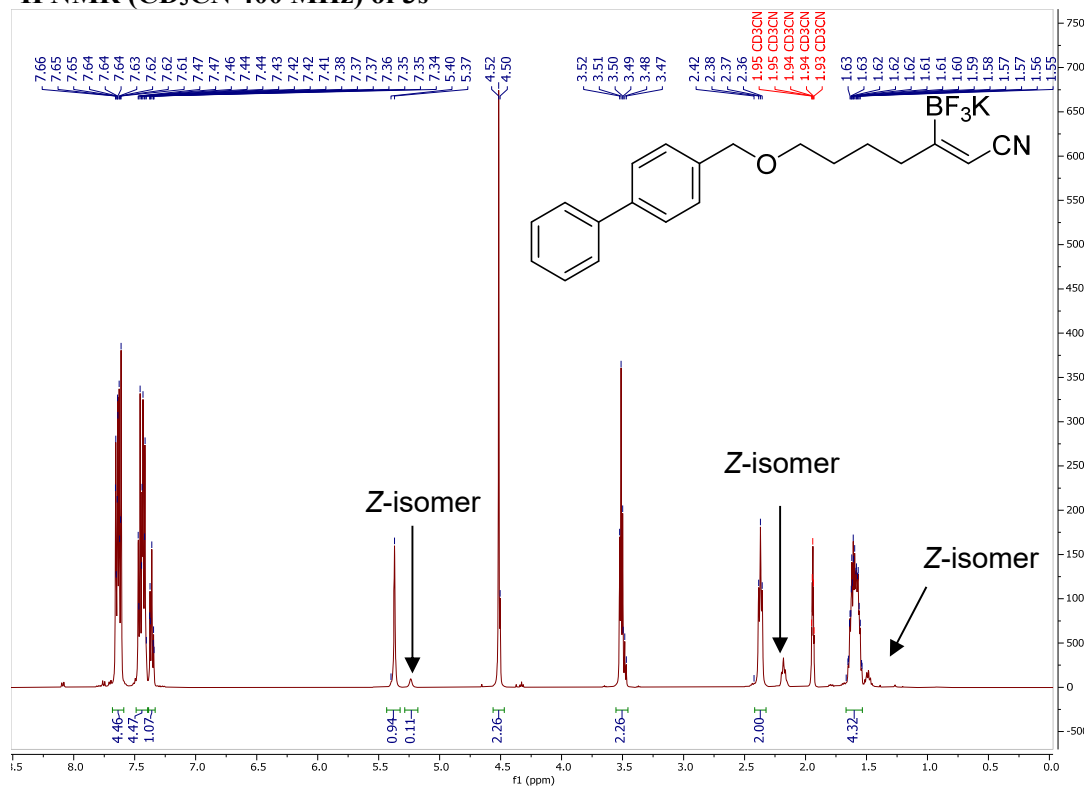

**<sup>13</sup>C NMR (CD<sub>3</sub>CN 100 MHz) of 3s**

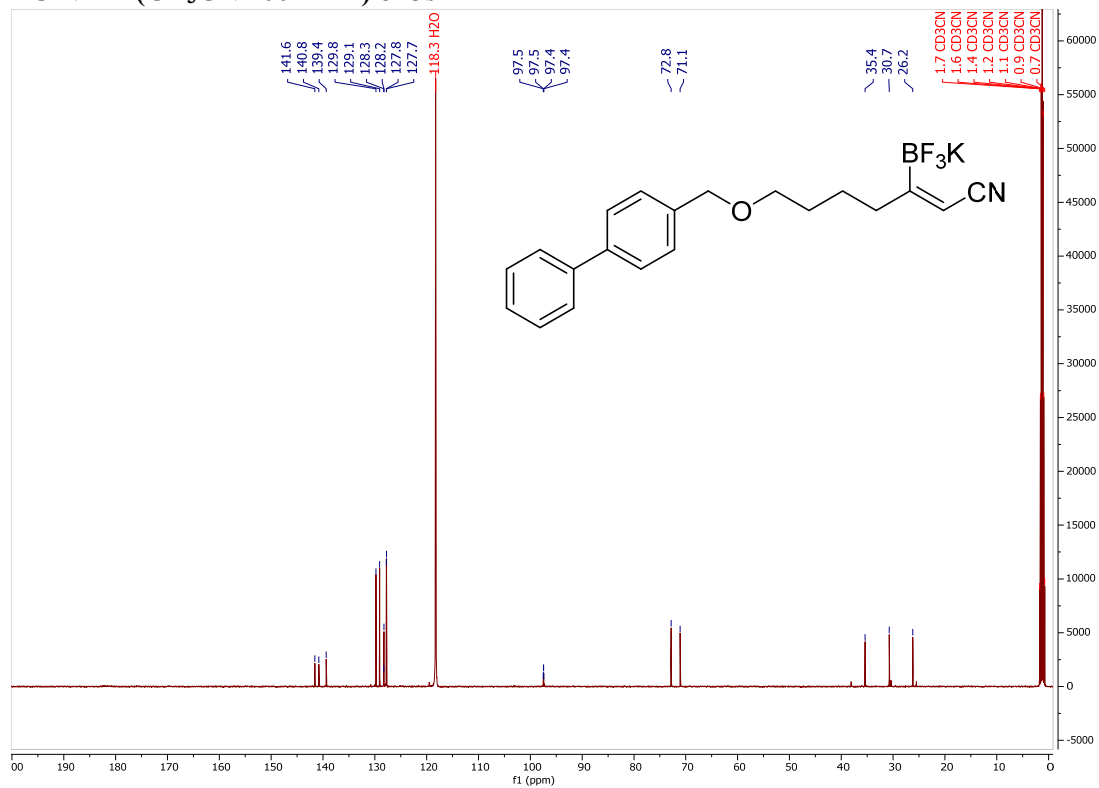

**<sup>19</sup>F NMR (CD<sub>3</sub>CN 376 MHz) of 3s**

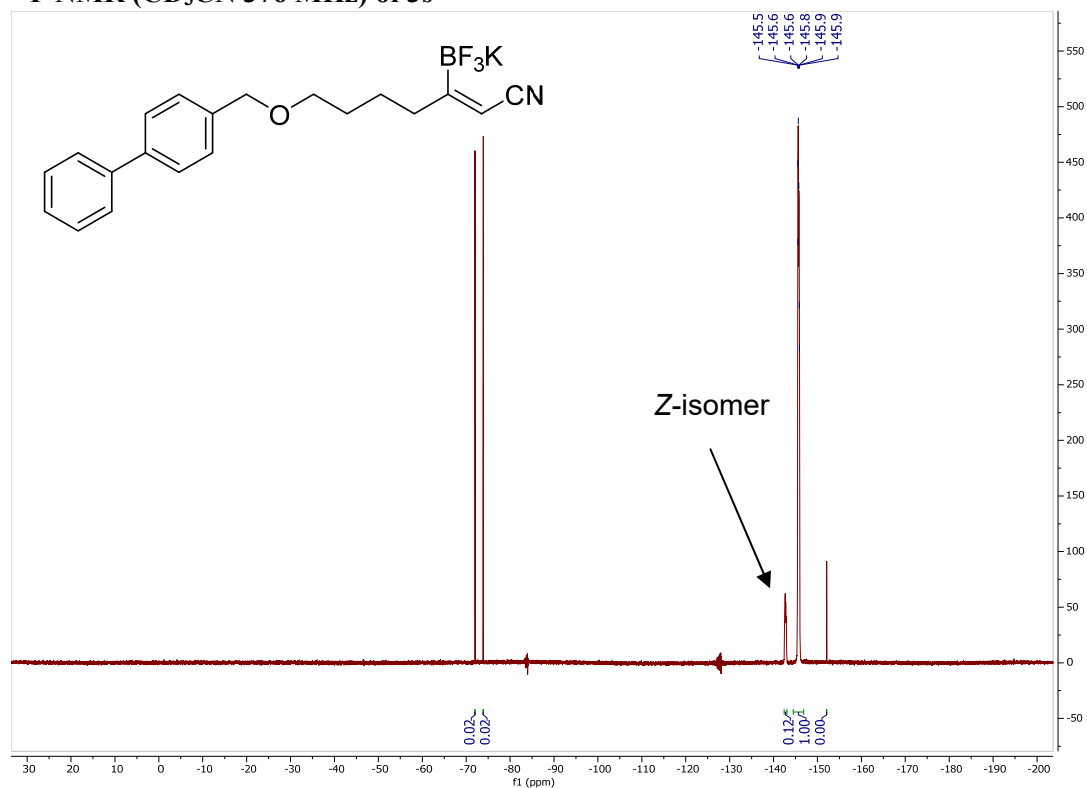

**$^{11}\text{B}$  NMR ( $\text{CD}_3\text{CN}$  128 MHz) of 3s**

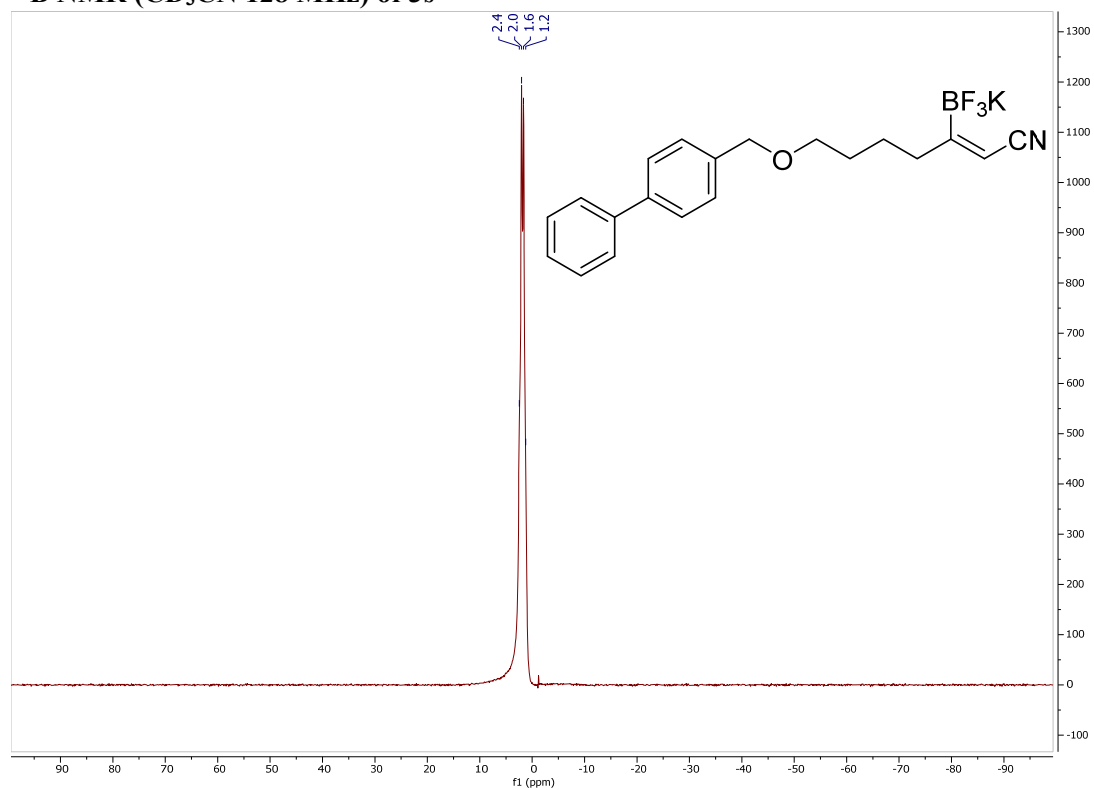

**20. Spectra for NMR studies**

**$^{31}\text{P}$  NMR ( $\text{CDCl}_3$  128 MHz) of  $\text{PPh}_3$**

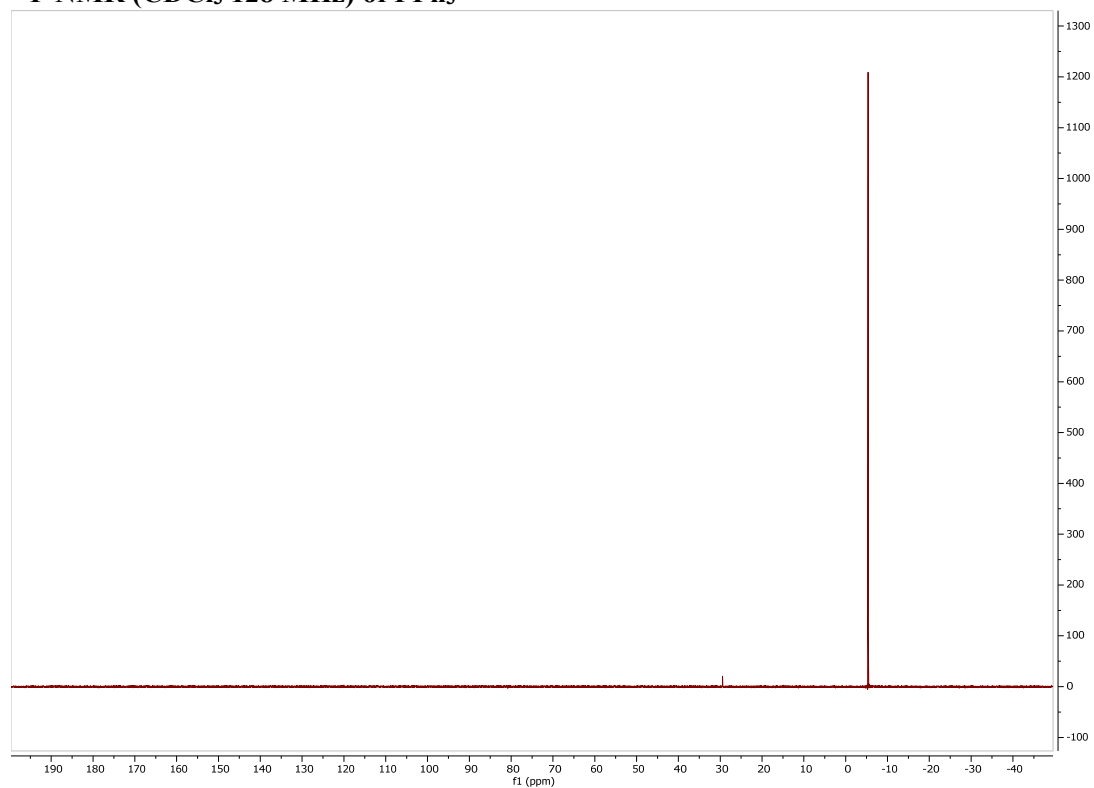

**$^{31}\text{P}$  NMR ( $\text{CDCl}_3$  128 MHz) of  $\text{PPh}_3$  and  $\text{BF}_3\cdot\text{OEt}_2$**

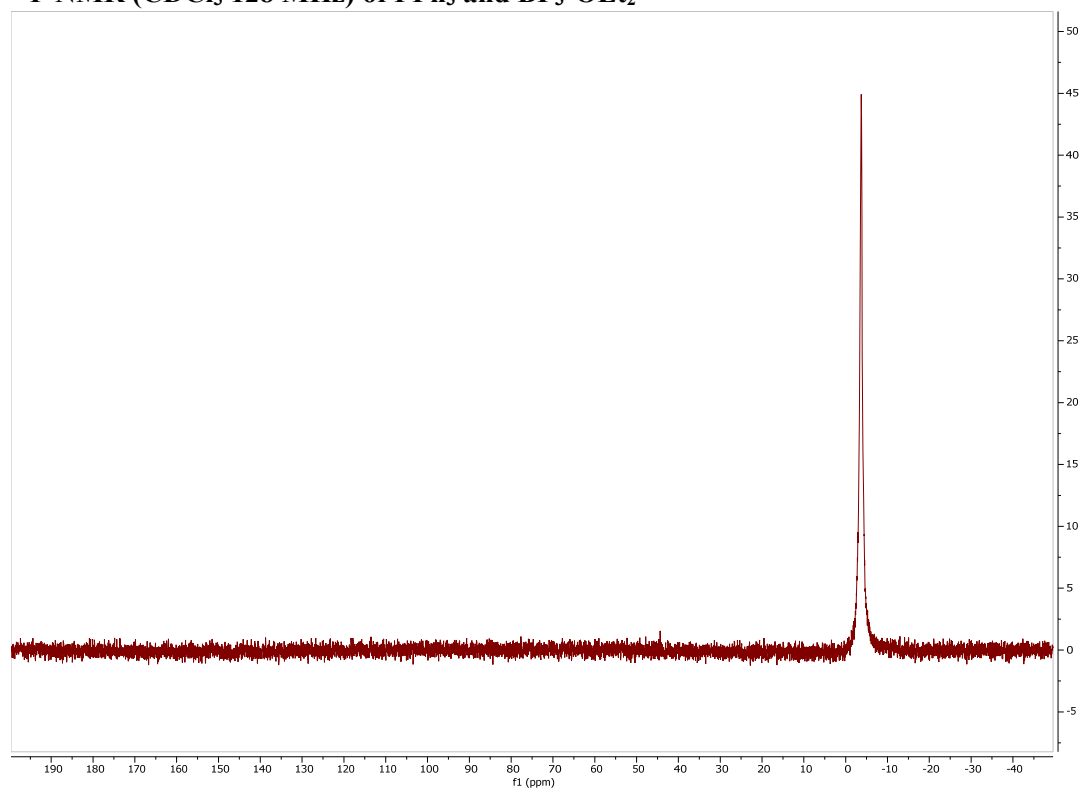

**$^{31}\text{P}$  NMR ( $\text{CDCl}_3$  128 MHz) of  $\text{PPh}_3$ , and  $\text{BF}_3\cdot\text{OEt}_2$ , and 1a**

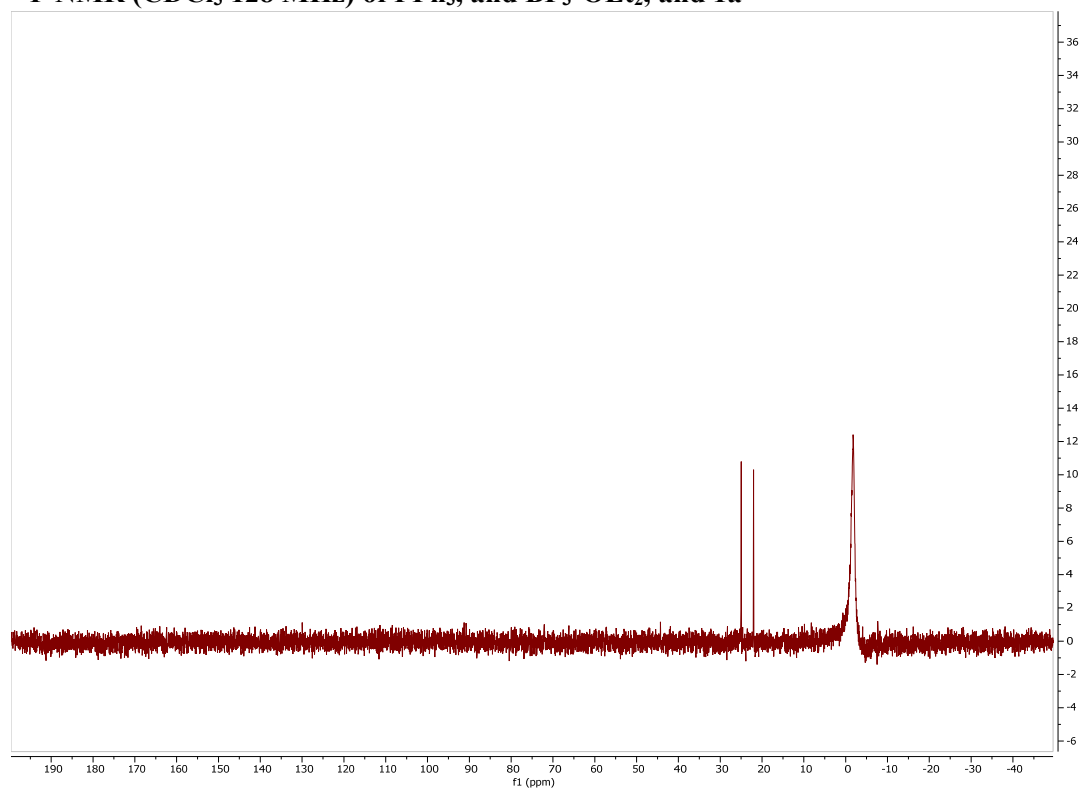



Combined  $^{31}\text{P}$  NMR spectra ( $\text{CDCl}_3$  128 MHz)

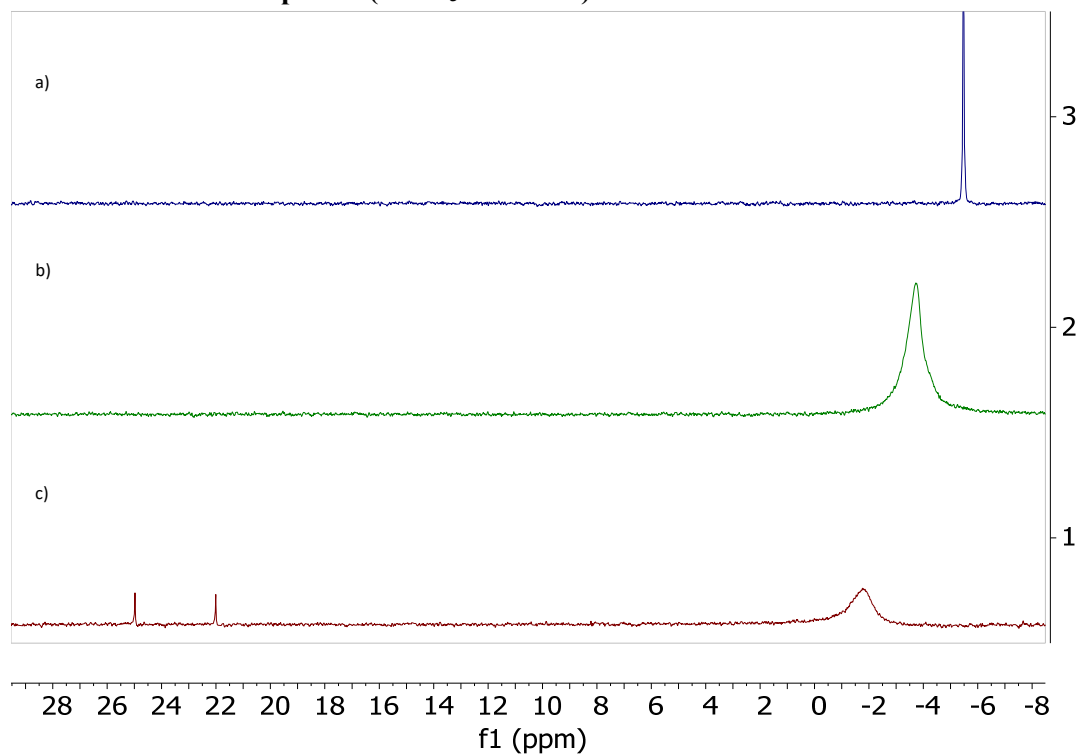

$^{31}\text{P}$  NMR studies in chloroform: a)  $\text{PPh}_3$  (80  $\mu\text{mol}$ ), b)  $\text{PPh}_3$  (80  $\mu\text{mol}$ ) and  $\text{BF}_3 \cdot \text{OEt}_2$  (80  $\mu\text{mol}$ ) and c)  $\text{PPh}_3$  (80  $\mu\text{mol}$ ),  $\text{BF}_3 \cdot \text{OEt}_2$  (80  $\mu\text{mol}$ ), and **1a** (80  $\mu\text{mol}$ ).

Combined Time Course  $^{13}\text{C}$  NMR studies in chloroform at rt.  $\text{PPh}_3$  (0.39 mmol), pinacolborane (0.43 mmol), and **1a** (0.39 mmol).

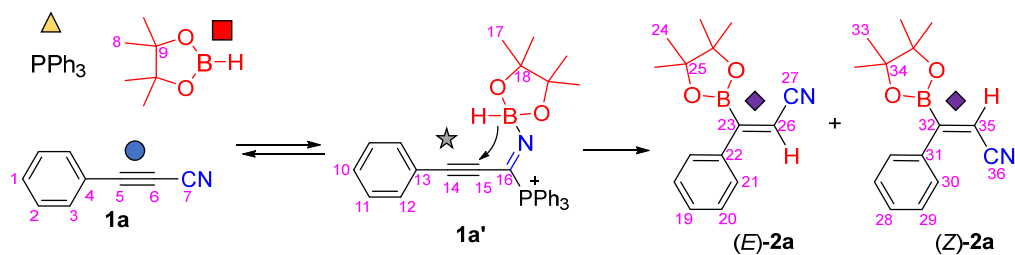

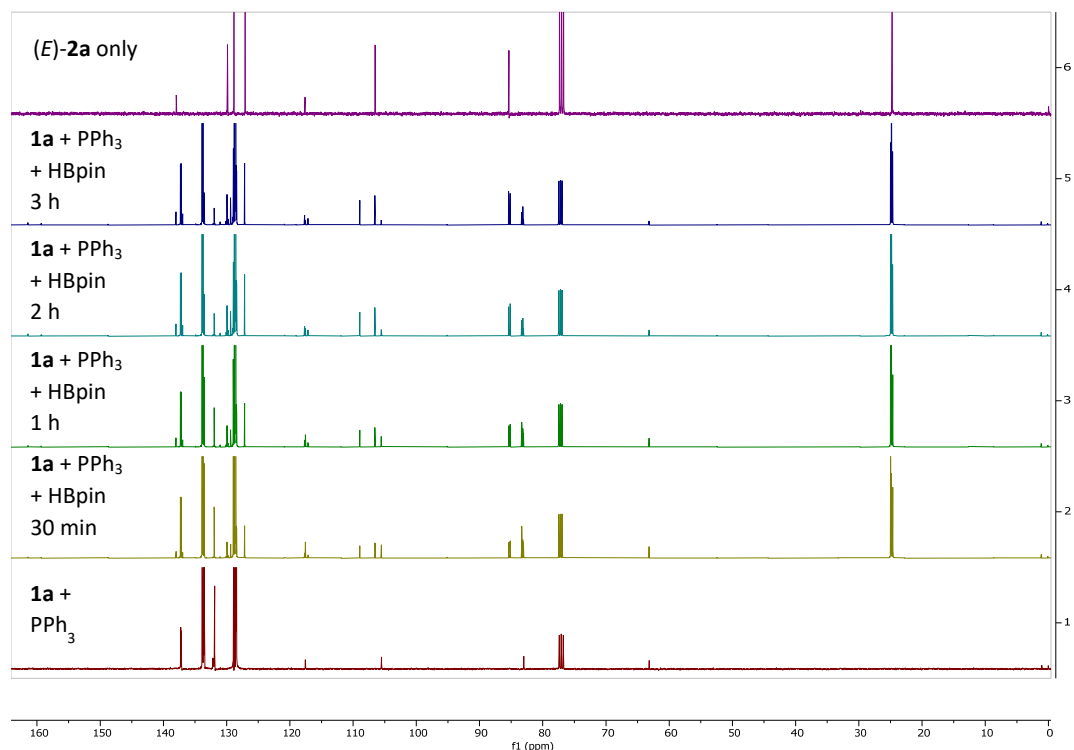

Peaks marked with ☆ correspond to intermediate **1a'**

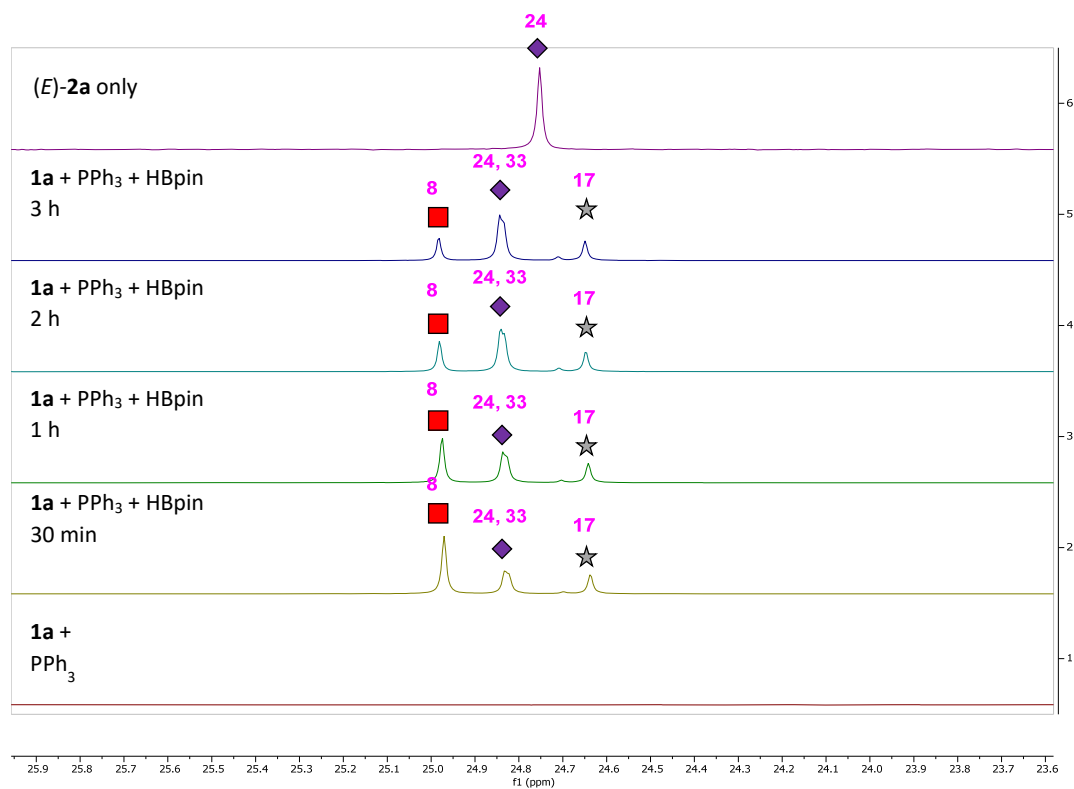

(*E*)-**2a** only

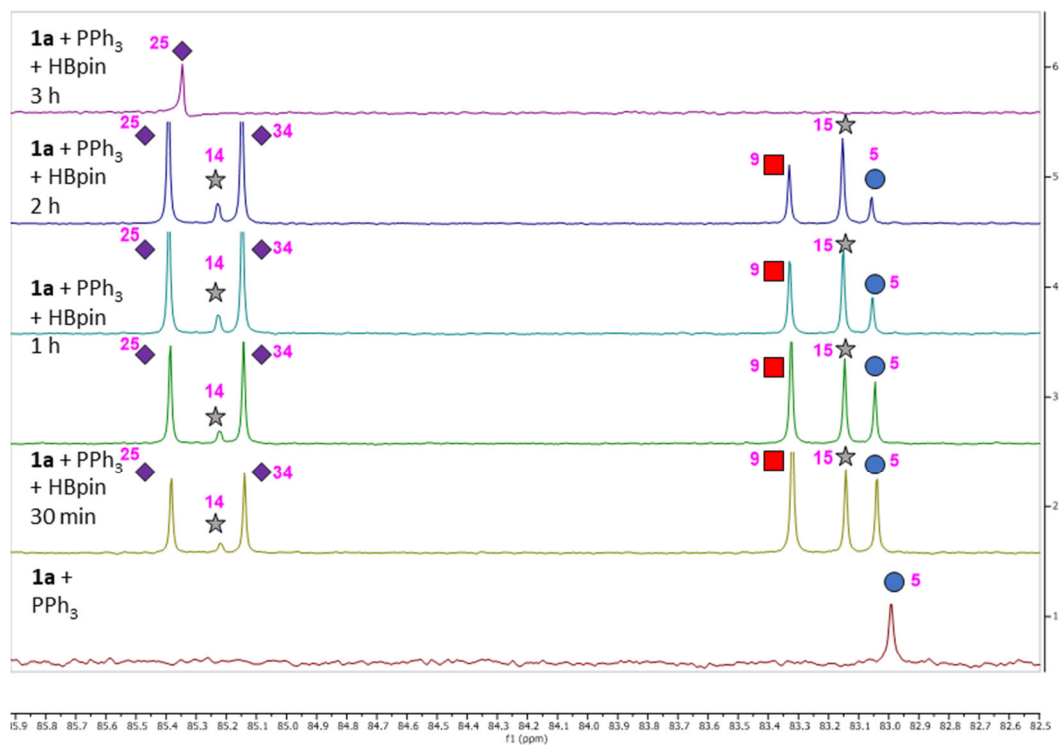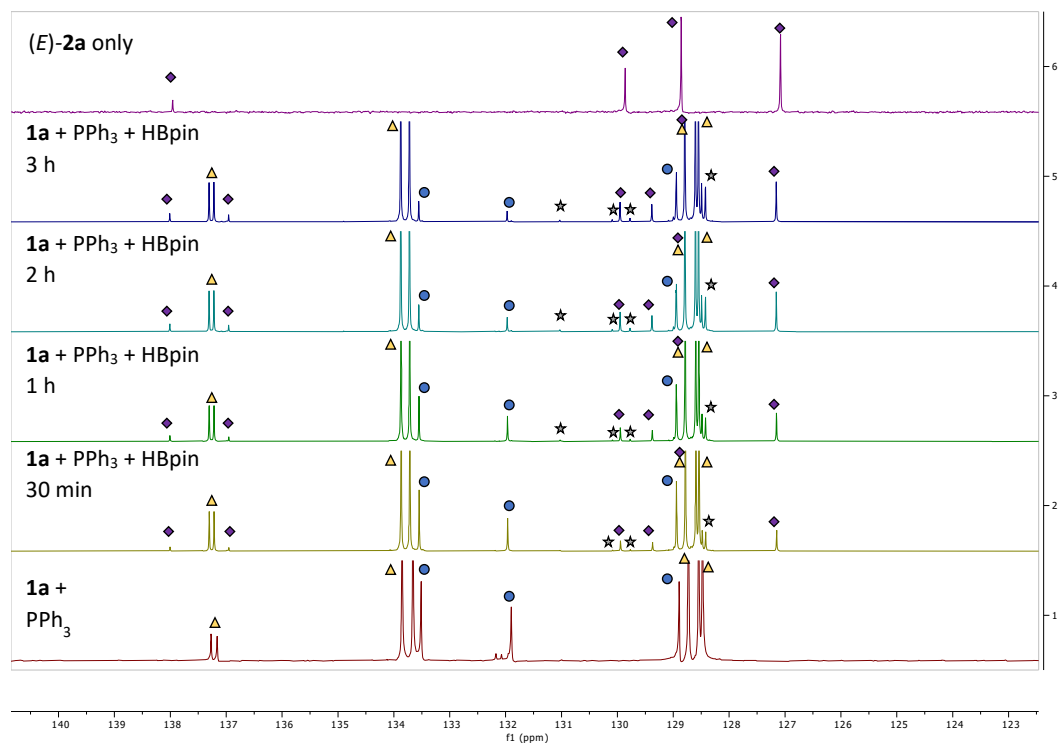

Annotated  $^{13}\text{C}$  NMR spectra for reaction with  $\text{PBu}_3$  at  $-20^\circ\text{C}$  after 30 minutes ( $\text{CDCl}_3$  128 MHz)  
 $^{13}\text{C}$  NMR studies in chloroform at  $-20^\circ\text{C}$ .  $\text{PBu}_3$  (0.039 mmol), pinacolborane (0.43 mmol),  
 and **1a** (0.39 mmol).

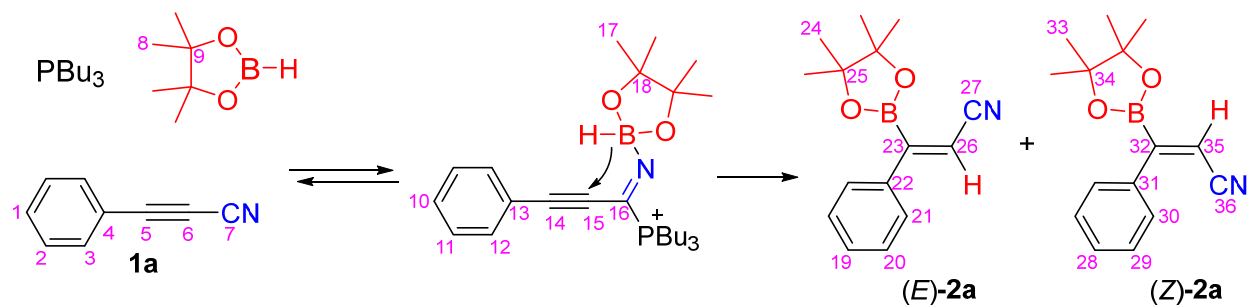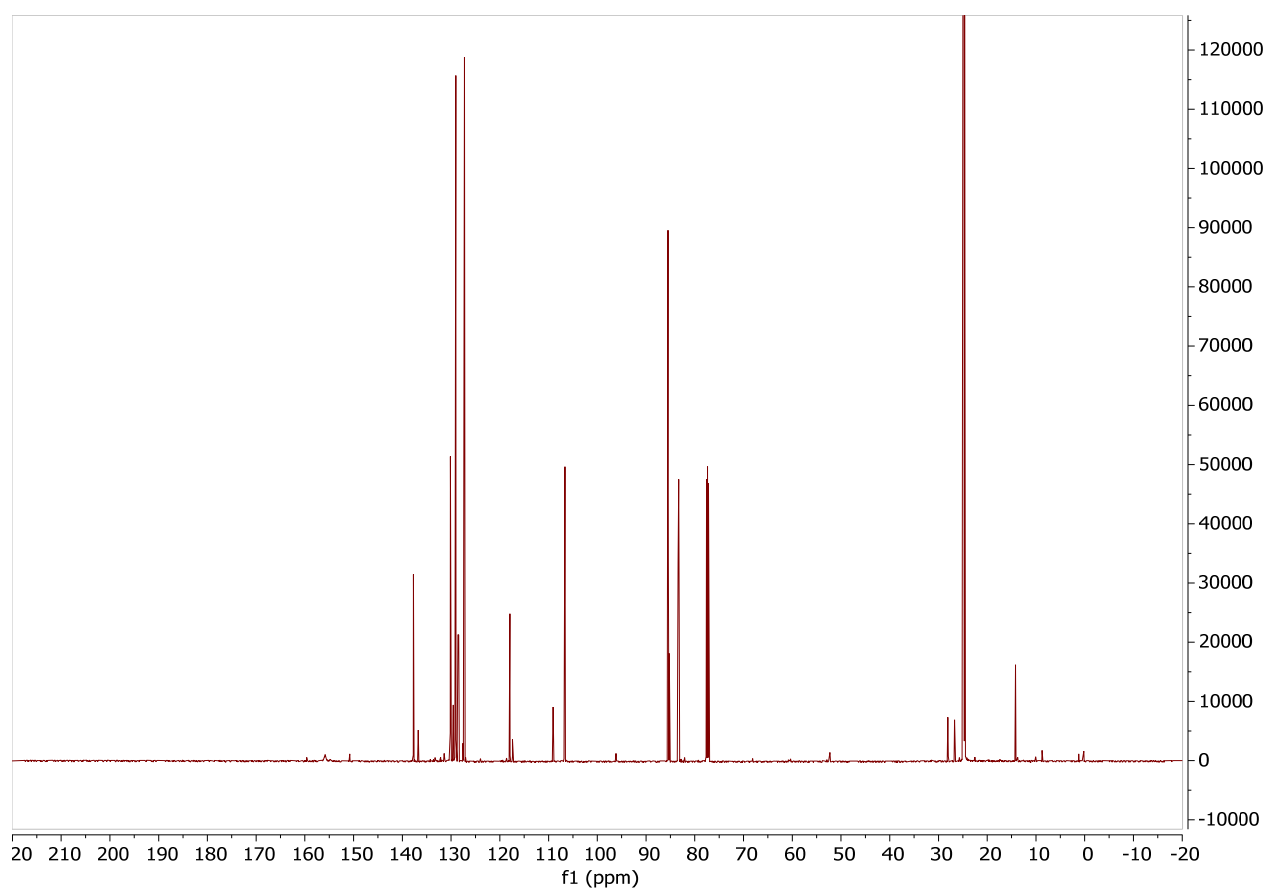

This spectra has been expanded in the following figures.

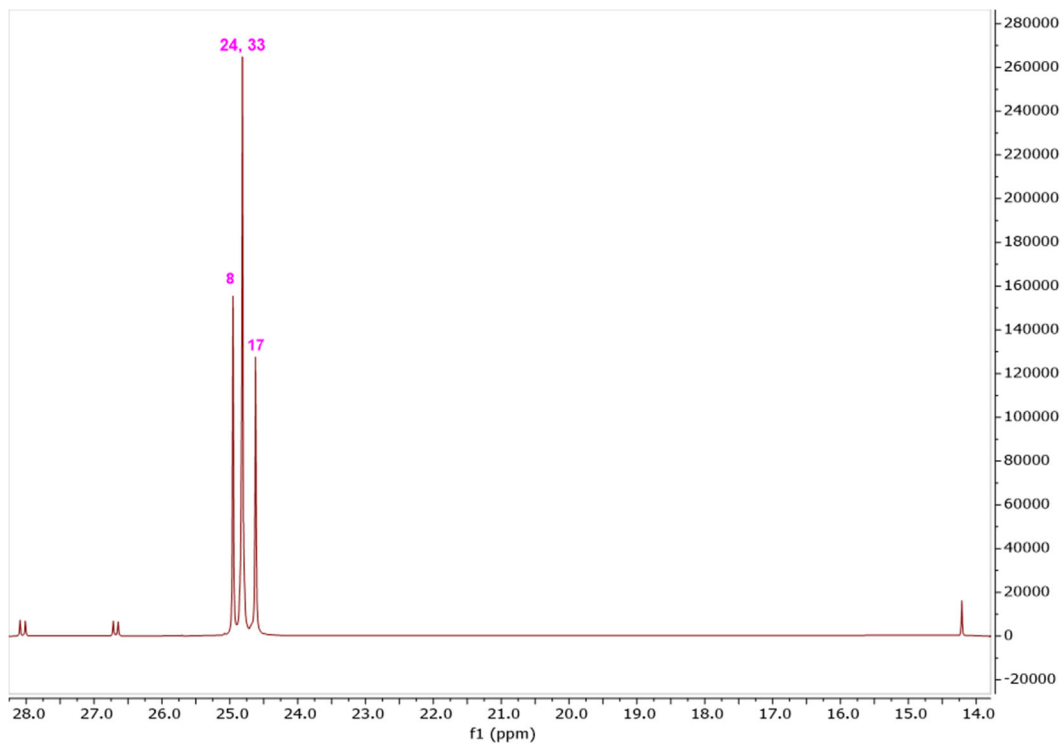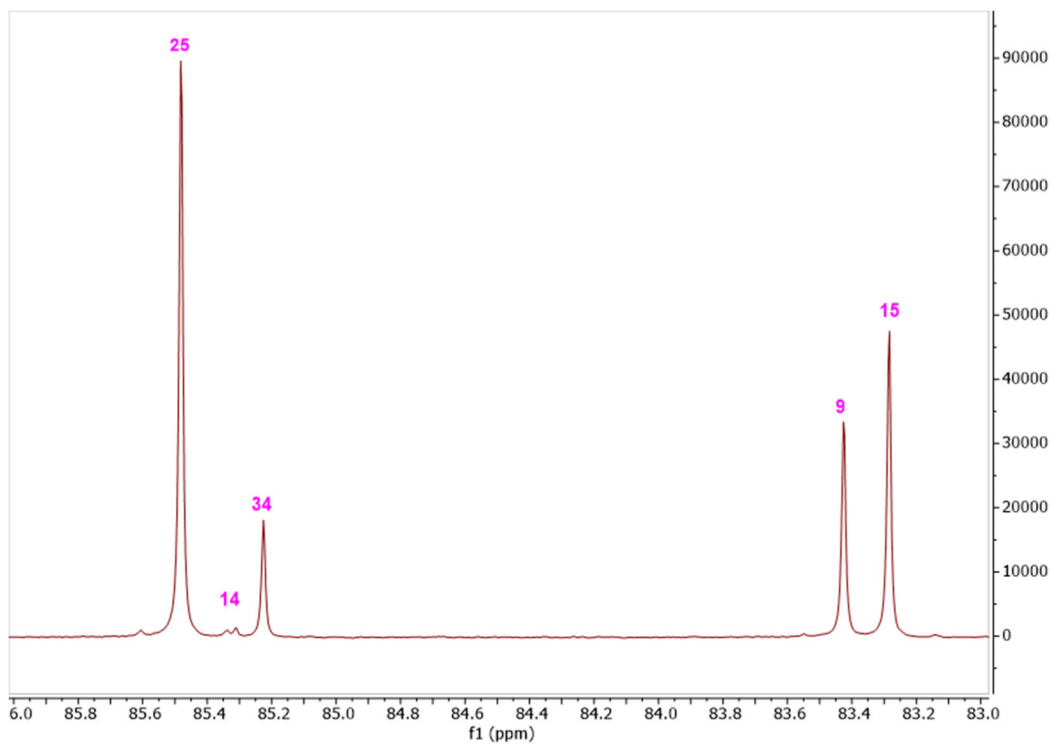

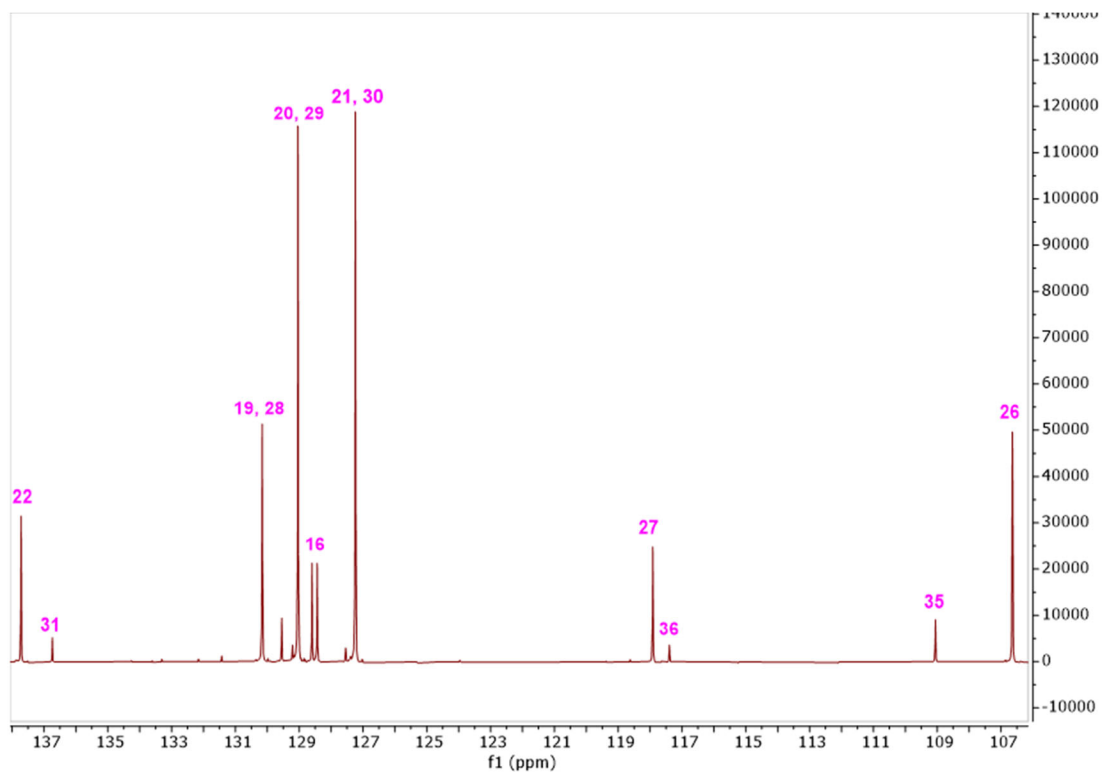

Additional rate determination studies were attempted using low temperature <sup>1</sup>H NMR. Due to the fast rate of reaction and temperature fluctuation during sample transfer, the rate of reaction could not be obtained from these experiments.

Attempts to observe the imine phosphonium intermediate by <sup>1</sup>H NMR at room temperature with triphenylphosphine as the catalyst were unsuccessful, with spectra only showing the starting material and product peaks.

**Table 1 Crystal data and structure refinement for cs2643.**

|                                    |                                                               |
|------------------------------------|---------------------------------------------------------------|
| Identification code                | JMB-05-071                                                    |
| Empirical formula                  | C <sub>10</sub> H <sub>8</sub> BF <sub>3</sub> KNO            |
| Formula weight                     | 265.08                                                        |
| Temperature/K                      | 99.98(11)                                                     |
| Crystal system                     | monoclinic                                                    |
| Space group                        | P2 <sub>1</sub> /c                                            |
| a/Å                                | 18.55436(11)                                                  |
| b/Å                                | 7.90140(4)                                                    |
| c/Å                                | 8.22574(5)                                                    |
| α/°                                | 90                                                            |
| β/°                                | 102.6760(6)                                                   |
| γ/°                                | 90                                                            |
| Volume/Å <sup>3</sup>              | 1176.545(12)                                                  |
| Z                                  | 4                                                             |
| ρ <sub>calc</sub> /cm <sup>3</sup> | 1.497                                                         |
| μ/mm <sup>-1</sup>                 | 4.187                                                         |
| F(000)                             | 536.0                                                         |
| Crystal size/mm <sup>3</sup>       | 0.21 × 0.19 × 0.07                                            |
| Radiation                          | Cu Kα (λ = 1.54184)                                           |
| 2θ range for data collection/°     | 4.882 to 156.154                                              |
| Index ranges                       | -23 ≤ h ≤ 23, -10 ≤ k ≤ 10, -9 ≤ l ≤ 10                       |
| Reflections collected              | 32096                                                         |
| Independent reflections            | 2515 [R <sub>int</sub> = 0.0425, R <sub>sigma</sub> = 0.0157] |
| Data/restraints/parameters         | 2515/0/155                                                    |

|                                                |                                  |
|------------------------------------------------|----------------------------------|
| Goodness-of-fit on $F^2$                       | 1.058                            |
| Final R indexes [ $I \geq 2\sigma(I)$ ]        | $R_1 = 0.0240$ , $wR_2 = 0.0631$ |
| Final R indexes [all data]                     | $R_1 = 0.0241$ , $wR_2 = 0.0632$ |
| Largest diff. peak/hole / $e \text{ \AA}^{-3}$ | 0.34/-0.32                       |

**Table 2 Bond Lengths for cs2643.**

| Atom | Atom            | Length/ $\text{\AA}$ | Atom | Atom            | Length/ $\text{\AA}$ |
|------|-----------------|----------------------|------|-----------------|----------------------|
| F1   | B1              | 1.4141(13)           | N1   | K1 <sup>2</sup> | 3.0032(10)           |
| F1   | K1 <sup>1</sup> | 2.6426(7)            | N1   | K1 <sup>5</sup> | 2.8559(10)           |
| F1   | K1 <sup>2</sup> | 2.7853(7)            | C1   | C2              | 1.4334(16)           |
| F2   | B1              | 1.4180(13)           | C1   | K1 <sup>2</sup> | 3.4518(11)           |
| F2   | K1 <sup>3</sup> | 2.6823(7)            | C2   | C3              | 1.3513(16)           |
| F2   | K1 <sup>2</sup> | 2.8028(7)            | C3   | C4              | 1.4811(15)           |
| F3   | B1              | 1.4020(14)           | C3   | B1              | 1.6302(16)           |
| F3   | K1              | 2.6327(7)            | C4   | C5              | 1.4063(16)           |
| F3   | K1 <sup>3</sup> | 3.1597(8)            | C4   | C9              | 1.3954(16)           |
| O1   | C7              | 1.3720(14)           | C5   | C6              | 1.3840(16)           |
| O1   | C10             | 1.4284(17)           | C6   | C7              | 1.3946(18)           |
| N1   | C1              | 1.1510(16)           | C7   | C8              | 1.3909(17)           |
| N1   | K1 <sup>4</sup> | 2.9935(10)           | C8   | C9              | 1.3930(16)           |

<sup>1</sup>1-X,1/2+Y,1/2-Z; <sup>2</sup>1-X,1-Y,1-Z; <sup>3</sup>+X,1/2-Y,1/2+Z; <sup>4</sup>+X,1+Y,+Z; <sup>5</sup>+X,3/2-Y,1/2+Z

**Table 3 Bond Angles for cs2643.**

| Atom | Atom | Atom            | Angle/ $^\circ$ | Atom            | Atom | Atom            | Angle/ $^\circ$ |
|------|------|-----------------|-----------------|-----------------|------|-----------------|-----------------|
| B1   | F1   | K1 <sup>1</sup> | 156.35(6)       | F3              | B1   | C3              | 112.71(9)       |
| B1   | F1   | K1 <sup>2</sup> | 103.03(6)       | F1 <sup>6</sup> | K1   | F1 <sup>2</sup> | 108.62(2)       |



**Table 3 Bond Angles for cs2643.**

| Atom            | Atom | Atom            | Angle/°    | Atom            | Atom | Atom            | Angle/°     |
|-----------------|------|-----------------|------------|-----------------|------|-----------------|-------------|
| K1 <sup>1</sup> | F1   | K1 <sup>2</sup> | 99.56(2)   | F1 <sup>6</sup> | K1   | F2 <sup>7</sup> | 81.57(2)    |
| B1              | F2   | K1 <sup>3</sup> | 113.22(6)  | F1 <sup>2</sup> | K1   | F2 <sup>2</sup> | 47.782(18)  |
| B1              | F2   | K1 <sup>2</sup> | 102.10(6)  | F1 <sup>6</sup> | K1   | F2 <sup>2</sup> | 69.06(2)    |
| K1 <sup>3</sup> | F2   | K1 <sup>2</sup> | 99.11(2)   | F1 <sup>6</sup> | K1   | F3 <sup>7</sup> | 66.495(19)  |
| B1              | F3   | K1              | 132.31(6)  | F1 <sup>2</sup> | K1   | F3 <sup>7</sup> | 172.34(2)   |
| B1              | F3   | K1 <sup>3</sup> | 91.65(6)   | F1 <sup>2</sup> | K1   | N1 <sup>8</sup> | 78.42(2)    |
| K1              | F3   | K1 <sup>3</sup> | 90.94(2)   | F1 <sup>6</sup> | K1   | N1 <sup>8</sup> | 136.34(3)   |
| C7              | O1   | C10             | 117.08(10) | F1 <sup>2</sup> | K1   | N1 <sup>9</sup> | 112.55(2)   |
| C1              | N1   | K1 <sup>4</sup> | 147.51(9)  | F1 <sup>2</sup> | K1   | N1 <sup>2</sup> | 68.02(2)    |
| C1              | N1   | K1 <sup>5</sup> | 112.01(8)  | F1 <sup>6</sup> | K1   | N1 <sup>2</sup> | 72.11(2)    |
| C1              | N1   | K1 <sup>2</sup> | 103.13(8)  | F1 <sup>6</sup> | K1   | N1 <sup>9</sup> | 83.27(3)    |
| K1 <sup>4</sup> | N1   | K1 <sup>2</sup> | 90.85(3)   | F2 <sup>7</sup> | K1   | F1 <sup>2</sup> | 141.94(2)   |
| K1 <sup>5</sup> | N1   | K1 <sup>2</sup> | 108.72(3)  | F2 <sup>7</sup> | K1   | F2 <sup>2</sup> | 148.885(17) |
| K1 <sup>4</sup> | N1   | K1 <sup>5</sup> | 90.23(3)   | F2 <sup>7</sup> | K1   | F3 <sup>7</sup> | 44.801(19)  |
| N1              | C1   | C2              | 178.01(12) | F2 <sup>2</sup> | K1   | F3 <sup>7</sup> | 124.759(19) |
| N1              | C1   | K1 <sup>2</sup> | 57.92(7)   | F2 <sup>2</sup> | K1   | N1 <sup>2</sup> | 79.91(2)    |
| C2              | C1   | K1 <sup>2</sup> | 123.43(7)  | F2 <sup>7</sup> | K1   | N1 <sup>9</sup> | 104.92(3)   |
| C3              | C2   | C1              | 122.30(10) | F2 <sup>7</sup> | K1   | N1 <sup>2</sup> | 81.54(2)    |
| C2              | C3   | C4              | 117.72(10) | F2 <sup>2</sup> | K1   | N1 <sup>8</sup> | 125.52(2)   |
| C2              | C3   | B1              | 121.26(10) | F2 <sup>2</sup> | K1   | N1 <sup>9</sup> | 82.21(2)    |
| C4              | C3   | B1              | 121.02(10) | F2 <sup>7</sup> | K1   | N1 <sup>8</sup> | 70.31(2)    |
| C5              | C4   | C3              | 121.58(10) | F3              | K1   | F1 <sup>6</sup> | 157.14(2)   |
| C9              | C4   | C3              | 120.78(10) | F3              | K1   | F1 <sup>2</sup> | 72.62(2)    |
| C9              | C4   | C5              | 117.64(11) | F3              | K1   | F2 <sup>7</sup> | 111.99(2)   |

**Table 3 Bond Angles for cs2643.**

| Atom | Atom | Atom | Angle/°    | Atom            | Atom | Atom            | Angle/°     |
|------|------|------|------------|-----------------|------|-----------------|-------------|
| C6   | C5   | C4   | 121.26(11) | F3              | K1   | F2 <sup>2</sup> | 99.13(2)    |
| C5   | C6   | C7   | 119.91(11) | F3              | K1   | F3 <sup>7</sup> | 109.43(2)   |
| O1   | C7   | C6   | 115.52(11) | F3              | K1   | N1 <sup>2</sup> | 126.55(3)   |
| O1   | C7   | C8   | 124.40(11) | F3              | K1   | N1 <sup>8</sup> | 66.50(3)    |
| C8   | C7   | C6   | 120.08(11) | F3              | K1   | N1 <sup>9</sup> | 75.59(3)    |
| C7   | C8   | C9   | 119.34(11) | N1 <sup>2</sup> | K1   | F3 <sup>7</sup> | 114.43(2)   |
| C8   | C9   | C4   | 121.75(11) | N1 <sup>8</sup> | K1   | F3 <sup>7</sup> | 109.22(2)   |
| F1   | B1   | F2   | 106.10(9)  | N1 <sup>9</sup> | K1   | F3 <sup>7</sup> | 61.79(2)    |
| F1   | B1   | C3   | 111.17(9)  | N1 <sup>9</sup> | K1   | N1 <sup>2</sup> | 153.462(11) |
| F2   | B1   | C3   | 111.23(9)  | N1 <sup>9</sup> | K1   | N1 <sup>8</sup> | 135.24(4)   |
| F3   | B1   | F1   | 108.13(9)  | N1 <sup>8</sup> | K1   | N1 <sup>2</sup> | 71.28(3)    |
| F3   | B1   | F2   | 107.18(9)  |                 |      |                 |             |

<sup>1</sup>1-X,1/2+Y,1/2-Z; <sup>2</sup>1-X,1-Y,1-Z; <sup>3</sup>+X,1/2-Y,1/2+Z; <sup>4</sup>+X,3/2-Y,1/2+Z; <sup>5</sup>+X,1+Y,+Z; <sup>6</sup>1-X,-1/2+Y,1/2-Z; <sup>7</sup>+X,1/2-Y,-1/2+Z; <sup>8</sup>+X,-1+Y,+Z; <sup>9</sup>+X,3/2-Y,-1/2+Z

**Table 4 Torsion Angles for cs2643.**

| A  | B  | C  | D  | Angle/°     | A               | B  | C  | D  | Angle/°     |
|----|----|----|----|-------------|-----------------|----|----|----|-------------|
| O1 | C7 | C8 | C9 | -179.29(11) | B1              | C3 | C4 | C9 | -37.54(15)  |
| C1 | C2 | C3 | C4 | -178.92(10) | K1 <sup>1</sup> | F1 | B1 | F2 | -153.02(11) |
| C1 | C2 | C3 | B1 | 0.54(16)    | K1 <sup>2</sup> | F1 | B1 | F2 | 9.46(9)     |
| C2 | C3 | C4 | C5 | -37.77(16)  | K1 <sup>1</sup> | F1 | B1 | F3 | -38.3(2)    |
| C2 | C3 | C4 | C9 | 141.92(11)  | K1 <sup>2</sup> | F1 | B1 | F3 | 124.17(7)   |
| C2 | C3 | B1 | F1 | 45.82(14)   | K1 <sup>2</sup> | F1 | B1 | C3 | -111.60(8)  |
| C2 | C3 | B1 | F2 | -72.18(13)  | K1 <sup>1</sup> | F1 | B1 | C3 | 85.92(17)   |
| C2 | C3 | B1 | F3 | 167.41(10)  | K1 <sup>3</sup> | F2 | B1 | F1 | 96.19(8)    |

**Table 4 Torsion Angles for cs2643.**

| <b>A</b> | <b>B</b> | <b>C</b> | <b>D</b> | <b>Angle/°</b> | <b>A</b>           | <b>B</b> | <b>C</b>        | <b>D</b> | <b>Angle/°</b> |
|----------|----------|----------|----------|----------------|--------------------|----------|-----------------|----------|----------------|
| C3       | C4       | C5       | C6       | 179.69(10)     | K1 <sup>2</sup> F2 | B1       | F1              |          | -9.37(9)       |
| C3       | C4       | C9       | C8       | -178.74(11)    | K1 <sup>3</sup> F2 | B1       | F3              |          | -19.17(10)     |
| C4       | C3       | B1       | F1       | -134.74(10)    | K1 <sup>2</sup> F2 | B1       | F3              |          | -124.72(7)     |
| C4       | C3       | B1       | F2       | 107.26(11)     | K1 <sup>3</sup> F2 | B1       | C3              |          | -142.79(7)     |
| C4       | C3       | B1       | F3       | -13.15(14)     | K1 <sup>2</sup> F2 | B1       | C3              |          | 111.66(8)      |
| C4       | C5       | C6       | C7       | -0.59(18)      | K1 <sup>3</sup> F3 | B1       | F1              |          | -99.14(8)      |
| C5       | C4       | C9       | C8       | 0.95(17)       | K1                 | F3       | B1              | F1       | -6.37(13)      |
| C5       | C6       | C7       | O1       | -179.79(11)    | K1 <sup>3</sup> F3 | B1       | F2              |          | 14.85(8)       |
| C5       | C6       | C7       | C8       | 0.26(18)       | K1                 | F3       | B1              | F2       | 107.62(9)      |
| C6       | C7       | C8       | C9       | 0.66(19)       | K1                 | F3       | B1              | C3       | -129.67(8)     |
| C7       | C8       | C9       | C4       | -1.29(19)      | K1 <sup>3</sup> F3 | B1       | C3              |          | 137.55(8)      |
| C9       | C4       | C5       | C6       | 0.00(17)       | K1 <sup>4</sup> N1 | C1       | K1 <sup>2</sup> |          | -116.73(7)     |
| C10      | O1       | C7       | C6       | -175.19(11)    | K1 <sup>5</sup> N1 | C1       | K1 <sup>2</sup> |          | 113.25(16)     |
| C10      | O1       | C7       | C8       | 4.76(18)       | K1 <sup>2</sup> C1 | C2       | C3              |          | 12.25(15)      |
| B1       | C3       | C4       | C5       | 142.77(11)     |                    |          |                 |          |                |
